# Supplementary material for: One-pot synthesis of diaryliodonium salts from arenes and aryl iodides with Oxone–sulfuric acid
Source: publisher site journal article supplement (doi:10.3762/bjoc.14.70), 2018-04-12

**Supporting Information**  
**for**  
**One-pot synthesis of diaryliodonium salts from arenes and**  
**aryl iodides with Oxone–sulfuric acid**

Natalia Soldatova<sup>1</sup>, Pavel Postnikov<sup>1</sup>, Olga Kukurina<sup>1</sup>, Viktor V. Zhdankin<sup>1,2</sup>, Akira Yoshimura<sup>1</sup>, Thomas Wirth<sup>3\*</sup> and Mekhman S. Yusubov<sup>1\*</sup>

Address: <sup>1</sup>The Tomsk Polytechnic University, 634050 Tomsk, Russia; <sup>2</sup>Department of Chemistry and Biochemistry, University of Minnesota Duluth, MN 55812, USA, <sup>3</sup>School of Chemistry, Cardiff University Park Place, Main Building, Cardiff CF10 3AT, UK

Email: Thomas Wirth\* - wirth@cf.ac.uk, Mekhman S. Yusubov\* - yusubov@tpu.ru

\* Corresponding author

**Experimental details and NMR spectra**

Contents:

|                                                                       |     |
|-----------------------------------------------------------------------|-----|
| Experimental.....                                                     | S2  |
| References .....                                                      | S9  |
| <sup>1</sup> H, <sup>13</sup> C and <sup>19</sup> F NMR spectra ..... | S10 |

## Experimental

### General information

All aromatic precursors, and other reagents and solvents were from commercial sources and used without further purification from freshly opened containers. NMR spectra were recorded at 300 and 400 MHz ( $^1\text{H}$  NMR), 75, 100 MHz ( $^{13}\text{C}$  NMR), 376 MHz ( $^{19}\text{F}$  NMR). Chemical shifts ( $\delta$ ) are reported in parts per million. Mass spectrometric measurements were performed by the EPSRC Mass Spectrometry Service Centre, Swansea University or by R. Jenkins/R. Hick/S. Waller at Cardiff University. Ions were generated by the atmospheric pressure chemical ionization (APCI), Electrospray (ES) or Electron Ionization (EI).

### General procedure for preparation of diaryliodonium bromides (**3a–o**).

Sulfuric acid (400–800  $\mu\text{L}$ ) was added to a stirred mixture of iodoarene (1 mmol), Oxone (1 mmol, 617 mg) and arene (1.1–3 mmol) in acetonitrile (2 mL). The reaction mixture was stirred overnight and a solution of KBr (2 mmol, 240 mg) in water (10 mL) was added. After the formation of a solid or oily residue, acetonitrile was removed under reduced pressure. To the residue  $\text{Et}_2\text{O}$  (10 mL) was added and the suspension stirred for 10 min. The precipitated diaryliodonium bromide was filtrated and washed with water (15 mL) and  $\text{Et}_2\text{O}$  (15 mL). The product was dried under vacuo.

#### Phenyl(*p*-tolyl)iodonium bromide (**3a**)

The reaction of iodobenzene (**1a**, 1 mmol, 204 mg), toluene (**2a**, 130  $\mu\text{L}$ , 1.2 mmol), sulfuric acid (400  $\mu\text{L}$ ), KBr (2 mmol, 240 mg) according to the general procedure afforded 322 mg (86%) of phenyl(*p*-tolyl)iodonium bromide (**3a**) as a yellow crystalline solid; mp 179 – 180  $^\circ\text{C}$  (lit 178 – 179  $^\circ\text{C}$  [1]).  $^1\text{H}$  NMR (300 MHz,  $\text{DMSO}-d_6$ ):  $\delta$  = 8.19 – 8.12 (m, 2H), 8.06 (d,  $J$  = 8.4 Hz, 2H), 7.58 (t,  $J$  = 7.5 Hz, 1H), 7.46 (t,  $J$  = 7.5 Hz, 2H), 7.27 (d,  $J$  = 8.1 Hz, 2H), 2.31 (s, 3H) ppm.  $^{13}\text{C}$  NMR (75 MHz,  $\text{DMSO}-d_6$ ):  $\delta$  = 141.7, 134.9, 134.77, 132.0, 131.4, 131.3, 119.5, 115.8, 20.9 ppm. HRMS (NSI)  $m/z$  calcd for  $\text{C}_{13}\text{H}_{12}\text{I}^+$ : 294.9978; found: 294.9978.

#### Diphenyliodonium bromide (**3b**)

The reaction of iodobenzene (**1a**, 1 mmol, 204 mg), benzene (**2b**, 120  $\mu\text{L}$ , 1.3 mmol), sulfuric acid (500  $\mu\text{L}$ ), KBr (2 mmol, 240mg) according to the general procedure afforded 268 mg (74%) of diphenyliodonium bromide (**3b**) as a yellow crystalline solid; mp 199 – 200  $^\circ\text{C}$  (lit 208 – 210  $^\circ\text{C}$  [2]).  $^1\text{H}$  NMR (400 MHz,  $\text{DMSO}-d_6$ ):  $\delta$  = 8.19 (dd,  $J$  = 8.4, 1.2 Hz, 2H), 7.60 (t,  $J$  = 7.6 Hz, 1H), 7.47 (t,  $J$  = 7.6 Hz, 2H) ppm.  $^{13}\text{C}$  NMR (75 MHz,  $\text{DMSO}-d_6$ : $\text{CDCl}_3$  6:1):  $\delta$  = 134.9, 131.3, 119.3 ppm. HRMS (NSI)  $m/z$  calcd for  $\text{C}_{12}\text{H}_{10}\text{I}^+$ : 280.9822; found: 280.9819.

### **(2,5-Dimethylphenyl)(phenyl)iodonium bromide (3c)**

The reaction of iodobenzene (**1a**, 1 mmol, 204 mg), *p*-xylene (**2c**, 135  $\mu$ L, 1.1 mmol), sulfuric acid (400  $\mu$ L), KBr (2 mmol, 240 mg) according to the general procedure afforded 293 mg (75%) of (2,5-dimethylphenyl)(phenyl)iodonium bromide (**3c**) as a yellow crystalline solid; mp 159 – 160 °C.  $^1\text{H}$  NMR (300 MHz, DMSO- $d_6$ ):  $\delta$  = 8.20 (s, 1H), 8.13 (d,  $J$  = 7.8 Hz, 2H), 7.78 – 7.15 (m, 5H), 2.56 (s, 3H), 2.29 (s, 3H) ppm.  $^{13}\text{C}$  NMR (75 MHz, DMSO- $d_6$ :CDCl<sub>3</sub> 6:1):  $\delta$  = 138.6, 136.9, 136.8, 134.4, 132.8, 131.3, 131.1, 130.7, 123.9, 119.1, 24.5, 20.1 ppm. HRMS (NSI)  $m/z$  calcd for C<sub>14</sub>H<sub>14</sub>I<sup>+</sup>: 309.0135; found: 309.0132.

### **Mesityl(phenyl)iodonium bromide (3d)**

The reaction of iodobenzene (**1a**, 1 mmol, 204 mg), mesitylene (**2d**, 150  $\mu$ L, 1.1 mmol), sulfuric acid (400  $\mu$ L), KBr (2 mmol, 240 mg) according to the general procedure afforded 301 mg (75%) of mesityl(phenyl)iodonium bromide (**3d**) as a white crystalline solid; mp 151 – 152 °C (lit 166 – 167 °C [3]).  $^1\text{H}$  NMR (400 MHz, DMSO- $d_6$ ):  $\delta$  = 7.88 (dd,  $J$  = 8.4, 1.2 Hz, 2H), 7.55 (t,  $J$  = 7.6 Hz, 1H), 7.43 (t,  $J$  = 8.0 Hz, 2H), 7.16 (s, 2H), 2.58 (s, 6H), 2.27 (s, 3H) ppm.  $^{13}\text{C}$  NMR (75 MHz, DMSO-  $d_6$ :CDCl<sub>3</sub> 6:1):  $\delta$  = 142.3, 140.9, 133.70, 131.4, 130.9, 129.5, 125.4, 118.2, 26.3, 20.6 ppm. HRMS (NSI)  $m/z$  calcd for C<sub>15</sub>H<sub>16</sub>I<sup>+</sup>: 323.0291; found: 323.0287.

### **Phenyl(3-(trifluoromethyl)phenyl)iodonium bromide (3e)**

The reaction of 3-iodo-1-(trifluoromethyl)benzene (**1b**, 1 mmol, 272 mg), benzene (**2b**, 120  $\mu$ L, 1.3 mmol), sulfuric acid (500  $\mu$ L), KBr (2 mmol, 240 mg) according to the general procedure afforded 365 mg (85%) of phenyl(3-(trifluoromethyl)phenyl)iodonium bromide (**3e**) as a white crystalline solid; mp 194 – 195 °C.  $^1\text{H}$  NMR (300 MHz, DMSO- $d_6$ ):  $\delta$  = 8.68 (s, 1H), 8.48 (d,  $J$  = 8.1 Hz, 1H), 8.25 (d,  $J$  = 7.5 Hz, 2H), 7.95 (d,  $J$  = 7.8 Hz, 1H), 7.68 (t,  $J$  = 7.8 Hz, 1H), 7.60 (t,  $J$  = 7.5 Hz, 1H), 7.48 (t,  $J$  = 7.8 Hz, 2H) ppm.  $^{13}\text{C}$  NMR (75 MHz, DMSO- $d_6$ ):  $\delta$  = 138.9, 135.0, 132.2, 131.5, 131.0 (q,  $J_{\text{CF}}$  = 33 Hz), 128.1, 124.9, 123.1 (q,  $J$  = 273 Hz, CF<sub>3</sub>), 121.3, 120.8, 120.4 ppm.  $^{19}\text{F}$  NMR (376 MHz, DMSO):  $\delta$  = –61.16 ppm. HRMS (NSI)  $m/z$  calcd for C<sub>13</sub>H<sub>9</sub>F<sub>3</sub>I<sup>+</sup>: 348.9696; found: 348.9691.

### **p-Tolyl(3-(trifluoromethyl)phenyl)iodonium bromide (3f)**

The reaction of 3-iodo-1-(trifluoromethyl)benzene (**1b**, 1 mmol, 272 mg), toluene (**2a**, 130  $\mu$ L, 1.2 mmol), sulfuric acid (400  $\mu$ L), KBr (2 mmol, 240 mg) according to the general procedure afforded 338 mg (76%) of p-tolyl(3-(trifluoromethyl)phenyl)iodonium bromide (**3f**) as a white crystalline solid; mp 178 – 179 °C.  $^1\text{H}$  NMR (300 MHz, DMSO- $d_6$ ):  $\delta$  = 8.66 (s, 1H), 8.44 (d,  $J$  = 8.1 Hz, 1H), 8.12 (d,  $J$  = 8.4 Hz, 2H), 7.95 (d,  $J$  = 7.8 Hz, 1H), 7.67 (t,  $J$  = 7.8 Hz, 1H), 7.29 (d,  $J$  = 8.1 Hz, 2H), 2.31 (s, 3H) ppm.  $^{13}\text{C}$  NMR (75 MHz, DMSO- $d_6$ ):  $\delta$  = 142.0, 138.8, 135.0, 132.1, 131.4, 130.9 (q,  $J_{\text{CF}}$  = 32 Hz), 128.0, 123.1 (q,  $J_{\text{CF}}$  = 273 Hz, CF<sub>3</sub>), 120.8, 116.6, 20.9 ppm.  $^{19}\text{F}$

NMR (376 MHz, CDCl<sub>3</sub>):  $\delta$  = -62.65 ppm. HRMS (NSI)  $m/z$  calcd for C<sub>14</sub>H<sub>11</sub>F<sub>3</sub>I<sup>+</sup>: 362.9852; found: 362.9849.

**(2,5-Dimethylphenyl)(3-(trifluoromethyl)phenyl)iodonium bromide (3g)**

The reaction of 3-iodo-1-(trifluoromethyl)benzene (**1b**, 1 mmol, 272 mg), *p*-xylene (**2c**, 135  $\mu$ L, 1.1 mmol), sulfuric acid (400  $\mu$ L), KBr (2 mmol, 240 mg) according to the general procedure afforded 433 mg (95%) of (2,5-dimethylphenyl)(3-(trifluoromethyl)phenyl)iodonium bromide (**3g**) as a grey crystalline solid; mp 148 – 149 °C. <sup>1</sup>H NMR (400 MHz, DMSO-*d*<sub>6</sub>):  $\delta$  = 8.60 (s, 1H), 8.36 (d,  $J$  = 8.4 Hz, 1H), 8.26 (s, 1H), 7.95 (d,  $J$  = 8.0 Hz, 1H), 7.67 (t,  $J$  = 8.0 Hz, 1H), 7.39 (d,  $J$  = 7.6 Hz, 1H), 7.34 (d,  $J$  = 7.6 Hz, 1H), 2.58 (s, 3H), 2.28 (s, 3H) ppm. <sup>13</sup>C NMR (75 MHz, DMSO-*d*<sub>6</sub>:CDCl<sub>3</sub> 6:1):  $\delta$  = 138.7, 138.3, 137.0, 136.8, 133.0, 132.2, 131.1, 131.14 (q,  $J_{CF}$  = 33 Hz), 130.8, 127.8, 124.2, 123.0 (q,  $J_{CF}$  = 273 Hz, CF<sub>3</sub>), 120.1, 24.5, 20.1 ppm. <sup>19</sup>F NMR (376 MHz, DMSO-*d*<sub>6</sub>):  $\delta$  = -61.15 ppm. HRMS (ESI)  $m/z$  calcd for C<sub>15</sub>H<sub>13</sub>F<sub>3</sub>I<sup>+</sup>: 377.0014; found: 377.0001.

**Mesityl(3-(trifluoromethyl)phenyl)iodonium bromide (3h)**

The reaction of 3-iodo-1-(trifluoromethyl)benzene (**1b**, 1 mmol, 272 mg), mesitylene (**2d**, 150  $\mu$ L, 1.1 mmol), sulfuric acid (400  $\mu$ L), KBr (2 mmol, 240 mg) according to the general procedure afforded 433 mg (92%) of mesityl(3-(trifluoromethyl)phenyl)iodonium bromide (**3h**) as a white crystalline solid; mp 138 – 139 °C. <sup>1</sup>H NMR (400 MHz, DMSO-*d*<sub>6</sub>):  $\delta$  = 8.36 (s, 1H), 7.98 (d,  $J$  = 7.6 Hz, 1H), 7.91 (d,  $J$  = 7.6 Hz, 1H), 7.63 (t,  $J$  = 8.0 Hz, 1H), 7.17 (s, 2H), 2.59 (s, 6H), 2.27 (s, 3H) ppm. <sup>13</sup>C NMR (100 MHz, DMSO):  $\delta$  = 142.5, 141.0, 137.3, 132.4, 131.0 (q,  $J_{CF}$  = 33 Hz), 130.3, 129.6, 127.7, 126.0, 123.1 (q,  $J_{CF}$  = 273 Hz, CF<sub>3</sub>), 119.7, 26.3, 20.5 ppm. <sup>19</sup>F NMR (376 MHz, DMSO-*d*<sub>6</sub>):  $\delta$  = -61.28 ppm. HRMS (NSI)  $m/z$  calcd for C<sub>16</sub>H<sub>15</sub>F<sub>3</sub>I<sup>+</sup>: 391.0165; found: 391.0165.

**(4-Chlorophenyl)(3-(trifluoromethyl)phenyl)iodonium bromide (3i)**

The reaction of 3-iodo-1-(trifluoromethyl)benzene (**1b**, 1 mmol, 272 mg), chlorobenzene (**2e**, 150  $\mu$ L, 1.5 mmol), sulfuric acid (800  $\mu$ L), KBr (2 mmol, 240 mg) according to the general procedure afforded 236 mg (51%) of (4-chlorophenyl)(3-(trifluoromethyl)phenyl)iodonium bromide (**3i**) as a white crystalline solid; mp 175 – 176 °C. <sup>1</sup>H NMR (300 MHz, DMSO-*d*<sub>6</sub>):  $\delta$  = 8.71 (s, 1H), 8.49 (d,  $J$  = 7.8 Hz, 1H), 8.26 (d,  $J$  = 8.7 Hz, 2H), 7.97 (d,  $J$  = 7.2 Hz, 1H), 7.69 (t,  $J$  = 8.1 Hz, 1H), 7.58 (d,  $J$  = 8.7 Hz, 2H) ppm. <sup>13</sup>C NMR (75 MHz, DMSO-*d*<sub>6</sub>):  $\delta$  = 138.9, 136.8, 136.7, 132.2, 131.5, 131.4, 131.0 (q,  $J_{CF}$  = 33 Hz), 128.0, 123.1 (q,  $J_{CF}$  = 273 Hz, CF<sub>3</sub>), 121.7, 119.2 ppm. <sup>19</sup>F NMR (376 MHz, DMSO-*d*<sub>6</sub>):  $\delta$  = -61.14 ppm. HRMS (NSI)  $m/z$  calcd for C<sub>13</sub>H<sub>8</sub>ClF<sub>3</sub>I<sup>+</sup>: 382.9306; found: 382.9305.

#### **(4-Bromophenyl)(*p*-tolyl)iodonium bromide (3j)**

The reaction of 1-bromo-4-iodobenzene (**1c**, 1 mmol, 282 mg), toluene (**2a**, 130  $\mu$ L, 1.2 mmol), sulfuric acid (400  $\mu$ L), KBr (2 mmol, 240 mg) according to the general procedure afforded 316 mg (70%) of (4-bromophenyl)(*p*-tolyl)iodonium bromide (**3j**) as a white crystalline solid; mp 171 – 172 °C.  $^1\text{H}$  NMR (400 MHz, DMSO- $d_6$ ):  $\delta$  = 8.09 (d,  $J$  = 6.4 Hz, 2H), 8.07 (d,  $J$  = 6.4 Hz, 2H), 7.68 (d,  $J$  = 8.4 Hz, 2H), 7.28 (d,  $J$  = 8.4 Hz, 2H), 2.32 (s, 3H) ppm.  $^{13}\text{C}$  NMR (75 MHz, DMSO- $d_6$ ):  $\delta$  = 141.8, 136.7, 134.9, 134.2, 132.1, 125.3, 118.7, 116.3, 20.8 ppm. HRMS (NSI)  $m/z$  calcd for  $\text{C}_{13}\text{H}_{11}\text{BrI}^+$ : 372.9083; found: 372.9085.

#### **(4-Bromophenyl)(2,5-dimethylphenyl)iodonium bromide (3k)**

The reaction of 1-bromo-4-iodobenzene (**1c**, 1 mmol, 282 mg), *p*-xylene (**2c**, 135  $\mu$ L, 1.1 mmol), sulfuric acid (400  $\mu$ L), KBr (2 mmol, 240 mg) according to the general procedure afforded 149 mg (32%) of (4-bromophenyl)(2,5-dimethylphenyl)iodonium bromide (**3k**) as a white crystalline solid; mp 180 – 181 °C.  $^1\text{H}$  NMR (400 MHz, DMSO- $d_6$ ):  $\delta$  = 8.20 (s, 1H), 8.05 (d,  $J$  = 8.8 Hz, 2H), 7.68 (d,  $J$  = 8.4 Hz, 2H), 7.40 (d,  $J$  = 8.0 Hz, 1H), 7.35 (d,  $J$  = 8.0 Hz, 1H), 2.55 (s, 3H), 2.29 (s, 3H) ppm.  $^{13}\text{C}$  NMR (75 MHz, DMSO- $d_6$ : $\text{CDCl}_3$  6:1):  $\delta$  = 138.9, 137.1, 136.9, 136.6, 134.4, 133.2, 130.9, 125.6, 118.6, 116.8, 24.5, 20.1 ppm. HRMS (NSI)  $m/z$  calcd for  $\text{C}_{14}\text{H}_{13}\text{BrI}^+$ : 386.9240; found: 386.9240.

#### **(4-Bromophenyl)(mesityl)iodonium bromide (3l)**

The reaction of 1-bromo-4-iodobenzene (**1c**, 1 mmol, 282 mg), mesitylene (**2d**, 150  $\mu$ L, 1.1 mmol), sulfuric acid (400  $\mu$ L), KBr (2 mmol, 240 mg) according to the general procedure afforded 316 mg (71%) of (4-bromophenyl)(mesityl)iodonium bromide (**3l**) as a white crystalline solid; mp 154 – 156 °C.  $^1\text{H}$  NMR (400 MHz, DMSO- $d_6$ ):  $\delta$  = 7.82 (d,  $J$  = 8.8 Hz, 2H), 7.66 (d,  $J$  = 8.8 Hz, 2H), 7.18 (s, 2H), 2.58 (s, 6H), 2.28 (s, 3H) ppm.  $^{13}\text{C}$  NMR (100 MHz, DMSO- $d_6$ ):  $\delta$  = 142.5, 141.0, 135.8, 134.3, 129.6, 125.4, 125.0, 116.9, 26.3, 20.6 ppm. HRMS (NSI)  $m/z$  calcd for  $\text{C}_{15}\text{H}_{15}\text{BrI}^+$ : 400.9396; found: 400.9395.

#### **(4-Bromophenyl)(4-chlorophenyl)iodonium bromide (3m)**

The reaction of 1-bromo-4-iodobenzene (**1c**, 1 mmol, 282 mg), chlorobenzene (**2e**, 150  $\mu$ L, 1.5 mmol), sulfuric acid (800  $\mu$ L), KBr (2 mmol, 240 mg) according to the general procedure afforded 161 mg (34%) of (4-bromophenyl)(4-chlorophenyl)iodonium bromide (**3m**) as a white crystalline solid; mp 169 – 170 °C.  $^1\text{H}$  NMR (300 MHz, DMSO- $d_6$ ):  $\delta$  = 8.23 (d,  $J$  = 8.4 Hz, 2H), 8.15 (d,  $J$  = 8.1 Hz, 2H), 7.73 (d,  $J$  = 8.4 Hz, 2H), 7.60 (d,  $J$  = 8.4 Hz, 2H) ppm.  $^{13}\text{C}$  NMR (75 MHz, DMSO- $d_6$ : $\text{CDCl}_3$  6:1):  $\delta$  = 137.0, 136.9, 136.8, 134.3, 131.5, 125.8, 117.5, 116.8 ppm. HRMS (NSI)  $m/z$  calcd for  $\text{C}_{12}\text{H}_8\text{ClBrI}^+$ : 392.8537; found: 392.8533.

### **(3,5-Bis(trifluoromethyl)phenyl)(phenyl)iodonium bromide (3n)**

The reaction of 1-iodo-3,5-bis(trifluoromethyl)benzene (**1d**, 1 mmol, 340 mg), benzene (**2b**, 120  $\mu$ L, 1.3 mmol), sulfuric acid (500  $\mu$ L), KBr (2 mmol, 240 mg) according to the general procedure afforded 174 mg (35%) of (3,5-bis(trifluoromethyl)phenyl)(phenyl)iodonium bromide **3n** as a white crystalline solid; mp 190 – 192 °C.  $^1\text{H}$  NMR (400 MHz, DMSO- $d_6$ ):  $\delta$  = 9.01 (s, 2H), 8.37 (s, 1H), 8.30 (dd,  $J$  = 8.4, 1.2 Hz, 1H), 7.62 (t,  $J$  = 7.2 Hz, 1H), 7.51 (t,  $J$  = 7.6 Hz, 2H) ppm.  $^{13}\text{C}$  NMR (75 MHz, DMSO- $d_6$ -CDCl<sub>3</sub> 6:1):  $\delta$  = 135.6, 135.1, 131.8 (q,  $J_{\text{CF}}$  = 34 Hz), 131.6, 131.4, 131.13, 125.0, 122.5, 122.7 (q,  $J$  = 274 Hz, CF<sub>3</sub>), 120.7 ppm.  $^{19}\text{F}$  NMR (376 MHz, DMSO- $d_6$ ):  $\delta$  = -61.21 ppm. HRMS (ESI)  $m/z$  calcd for C<sub>14</sub>H<sub>8</sub>F<sub>6</sub>I<sup>+</sup>: 416.9575; found: 416.9584.

### **(3,5-Bis(trifluoromethyl)phenyl)(mesityl)iodonium bromide (3o)**

The reaction of 1-iodo-3,5-bis(trifluoromethyl)benzene (**1d**, 1 mmol, 340 mg), mesitylene (**2d**, 150  $\mu$ L, 1.1 mmol), sulfuric acid (400  $\mu$ L), KBr (2 mmol, 240 mg) according to the general procedure afforded 334 mg (62%) of (3,5-bis(trifluoromethyl)phenyl)(mesityl)iodonium bromide (**3o**) as a white crystalline solid; mp 142 – 144 °C.  $^1\text{H}$  NMR (400 MHz, DMSO- $d_6$ ):  $\delta$  = 8.43 (s, 2H), 8.34 (s, 1H), 7.21 (s, 2H), 2.61 (s, 6H), 2.29 (s, 3H) ppm.  $^{13}\text{C}$  NMR (75 MHz, DMSO- $d_6$ -CDCl<sub>3</sub> 6:1):  $\delta$  = 142.9, 141.1, 133.6, 132.0 (q,  $J_{\text{CF}}$  = 34 Hz), 129.7, 125.6, 124.7, 122.2 (q,  $J$  = 274 Hz, CF<sub>3</sub>), 121.3, 26.31, 20.57 ppm.  $^{19}\text{F}$  NMR (376 MHz, DMSO- $d_6$ ):  $\delta$  = -61.36 ppm. HRMS (ESI)  $m/z$  calcd for C<sub>17</sub>H<sub>14</sub>F<sub>6</sub>I<sup>+</sup>: 459.0044; found: 459.0060.

### **General procedure for preparation of symmetric diaryliodonium bromides (3b, 3t–v).**

Sulfuric acid (400–800  $\mu$ L) was added to a stirred mixture of iodine (0.5 mmol, 127 mg), Oxone (2 mmol, 1.23 g) and arene (2.2–3 mmol) in acetonitrile (2 mL). The reaction mixture was stirred overnight and a solution of KBr (2 mmol, 240 mg) in water (10 mL) was added. After the formation of solid or oil residue acetonitrile was removed under low pressure. To the residue Et<sub>2</sub>O (10 mL) was added and the suspension was stirred for 10 min. The precipitated diaryliodonium bromide was filtrated and washed with water (15 mL) and Et<sub>2</sub>O (15 mL). The product was dried under vacuo.

### **Diphenyliodonium bromide (3b)**

The reaction of iodine (0.5 mmol, 127 mg), benzene (**2b**, 240  $\mu$ L, 2.6 mmol), sulfuric acid (500  $\mu$ L), KBr (2 mmol, 240mg) according to the general procedure afforded 304 mg (84%) of diphenyliodonium bromide (**3b**) as a yellow crystalline solid; mp 201 – 202 °C (lit 208 – 210 °C [2]).

### **Bis(2,5-dimethylphenyl)iodonium bromide (3t)**

The reaction of iodine (0.5 mmol, 127 mg), *p*-xylene (**2c**, 270  $\mu$ L, 2.2 mmol), sulfuric acid (400  $\mu$ L), KBr (2 mmol, 240 mg) according to the general procedure afforded 334 mg (80%) of **3t** as a white crystalline solid; mp 129 – 130 °C.  $^1\text{H}$  NMR (300 MHz, DMSO- $d_6$ ):  $\delta$  = 8.10 (s, 2H),

7.40 (d,  $J = 7.8$  Hz, 2H), 7.34 (d,  $J = 7.8$  Hz, 2H), 2.56 (s, 6H), 2.29 (s, 6H) ppm.  $^{13}\text{C}$  NMR (75 MHz, DMSO- $d_6$ ):  $\delta = 138.8, 137.2, 136.9, 133.0, 131.0, 121.9, 24.5, 20.1$  ppm. HRMS (NSI)  $m/z$  calcd for  $\text{C}_{16}\text{H}_{18}\text{I}^+$ : 337.0448; found: 337.0446.

#### **Dimesityliodonium bromide (3u)**

The reaction of iodine (0.5 mmol, 127 mg), mesitylene (**2d**, 300  $\mu\text{L}$ , 2.2 mmol), sulfuric acid (400  $\mu\text{L}$ ), KBr (2 mmol, 240 mg) according to the general procedure afforded 344 mg (77%) of **3u** as a white crystalline solid; mp 114 – 115  $^{\circ}\text{C}$  (lit 134-135  $^{\circ}\text{C}$  [4]).  $^1\text{H}$  NMR (300 MHz, MeOD):  $\delta = 7.16$  (s, 4H), 2.51 (s, 12H), 2.32 (s, 6H) ppm.  $^{13}\text{C}$  NMR (75 MHz, MeOD):  $\delta = 145.2, 143.6, 131.7, 119.5, 31.5, 20.9$  ppm. HRMS (NSI)  $m/z$  calcd for  $\text{C}_{18}\text{H}_{22}\text{I}^+$ : 365.0761; found: 365.0755.

#### **Bis(4-chlorophenyl)iodonium bromide (3v)**

The reaction of iodine (0.5 mmol, 127 mg), chlorobenzene (**2e**, 300  $\mu\text{L}$ , 3.0 mmol), sulfuric acid (800  $\mu\text{L}$ ), KBr (2 mmol, 240 mg) according to the general procedure afforded 171 mg (40%) of **3v** as a white crystalline solid; mp 188 – 189  $^{\circ}\text{C}$  (lit 189 – 190  $^{\circ}\text{C}$  [5]).  $^1\text{H}$  NMR (300 MHz, DMSO- $d_6$ ):  $\delta = 8.20$  (d,  $J = 8.7$  Hz, 1H), 7.55 (d,  $J = 8.7$  Hz, 1H) ppm.  $^{13}\text{C}$  NMR (75 MHz, DMSO- $d_6$ ):  $\delta = 136.7, 136.7, 131.4, 118.4$  ppm. HRMS (NSI)  $m/z$  calcd for  $\text{C}_{12}\text{H}_8\text{Cl}_2\text{I}^+$ : 348.9042; found: 348.9043.

#### **Procedure for preparation of mesityl(3-(trifluoromethyl)phenyl)iodonium tosylate (3p).**

Sulfuric acid (400  $\mu\text{L}$ ) was added to a stirred mixture of 3-iodo-1-(trifluoromethyl)benzene (**1b**, 1 mmol, 272 mg), Oxone (1 mmol, 617 mg) and mesitylene (**2d**, 150  $\mu\text{L}$ , 1.1 mmol) in acetonitrile (2 mL). The reaction mixture was stirred overnight and a solution of  $\text{TsOH} \cdot \text{H}_2\text{O}$  (2 mmol, 380 mg) in water (10 mL) was added. After the formation of a solid residue, acetonitrile was removed under reduced pressure. To the residue  $\text{Et}_2\text{O}$  (10 mL) was added and the suspension was stirred for 10 min. The precipitated diaryliodonium tosylate **3p** was filtrated and washed with water (15 mL) and  $\text{Et}_2\text{O}$  (15 mL). The product was dried under vacuo. The product was obtained in 82% yield (460 mg) as a white crystalline solid; mp 162 – 163  $^{\circ}\text{C}$ .  $^1\text{H}$  NMR (400 MHz, DMSO- $d_6$ ):  $\delta = 8.48$  (s, 1H), 8.11 (d,  $J = 8.4$  Hz, 1H), 8.01 (d,  $J = 7.6$  Hz, 1H), 7.70 (t,  $J = 8.0$  Hz, 1H), 7.45 (d,  $J = 8.0$  Hz, 2H), 7.23 (s, 2H), 7.10 (d,  $J = 8.0$  Hz, 2H), 2.59 (s, 6H), 2.30 (s, 3H), 2.28 (s, 3H) ppm.  $^{13}\text{C}$  NMR (75 MHz, DMSO- $d_6$ : $\text{CDCl}_3$  6:1):  $\delta = 145.3, 143.3, 141.7, 137.8, 132.8, 131.4$  (q,  $J_{\text{CF}} = 33$  Hz), 130.9, 129.8, 128.3, 128.0, 125.5, 122.9 (q,  $J_{\text{CF}} = 273$  Hz,  $\text{CF}_3$ ), 122.6, 114.7, 26.4, 20.8, 20.6 ppm.  $^{19}\text{F}$  NMR (376 MHz, DMSO- $d_6$ ):  $\delta = -61.26$  ppm. HRMS (ESI)  $m/z$  calcd for  $\text{C}_{16}\text{H}_{15}\text{F}_3\text{I}^+$ : 391.0171; found: 391.0170.

### General procedure for preparation of mesityl(3-(trifluoromethyl)phenyl)iodonium salts (**3q–s**).

Sulfuric acid (400  $\mu$ L) was added to a stirred mixture of 3-iodo-1-(trifluoromethyl)benzene (**1b**, 1 mmol, 272 mg), Oxone (1mmol, 617 mg) and mesitylene (**2d**, 150  $\mu$ L, 1.1 mmol) in acetonitrile (2 mL). The reaction mixture was stirred overnight and a solution of salt or acid (2 mmol) in water (10 mL) was added. The diaryliodonium salt was extracted with  $\text{CH}_2\text{Cl}_2$  ( $3 \times 5$  mL). The combined organic layers were dried with  $\text{Na}_2\text{SO}_4$  and the solvent was removed under the reduced pressure. A mixture of hexane (9 mL) and  $\text{Et}_2\text{O}$  (1 mL) was added to the residue. The product was filtered off and washed with hexane ( $3 \times 5$  mL). The product was dried under vacuo.

#### Mesityl(3-(trifluoromethyl)phenyl)iodonium trifluoromethanesulfonate (**3q**)

The reaction of 3-iodo-1-(trifluoromethyl)benzene (**1b**, 1 mmol, 272 mg), mesitylene (**2d**, 150  $\mu$ L, 1.1 mmol), sulfuric acid (400  $\mu$ L), TfOH (2 mmol, 176  $\mu$ L) according to the general procedure afforded 481 mg (89%) of **3q** as a beige crystalline solid; mp 100 – 101  $^\circ\text{C}$  (lit 107 – 108  $^\circ\text{C}$  [6]).  $^1\text{H}$  NMR (400 MHz,  $\text{CDCl}_3$ ):  $\delta$  = 7.94 (d,  $J$  = 8.0 Hz, 1H), 7.91 (s, 1H), 7.77 (d,  $J$  = 8.0 Hz, 1H), 7.54 (t,  $J$  = 8.0 Hz, 1H), 7.12 (s, 2H), 2.63 (s, 6H), 2.37 (s, 3H) ppm.  $^{13}\text{C}$  NMR (100 MHz,  $\text{CDCl}_3$ ):  $\delta$  = 144.9, 142.6, 136.5, 134.2 (q,  $J_{\text{CF}}$  = 34 Hz), 132.5, 130.6, 129.8, 128.6, 122.5 (q,  $J_{\text{CF}}$  = 272 Hz,  $\text{CF}_3$ ), 120.2 (q,  $J_{\text{CF}}$  = 318 Hz,  $\text{CF}_3\text{SO}_3^-$ ), 120.9, 112.0, 27.3, 21.3 ppm.  $^{19}\text{F}$  NMR (376 MHz,  $\text{CDCl}_3$ ):  $\delta$  = –63.01, –78.54 ppm. HRMS (ESI)  $m/z$  calcd for  $\text{C}_{16}\text{H}_{15}\text{F}_3\text{I}^+$ : 391.0171; found: 391.0189.

#### Mesityl(3-(trifluoromethyl)phenyl)iodonium tetrafluoroborate (**3r**)

The reaction of 3-iodo-1-(trifluoromethyl)benzene (**1b**, 1 mmol, 272 mg), mesitylene (**1d**, 150  $\mu$ L, 1.1 mmol), sulfuric acid (400  $\mu$ L),  $\text{NaBF}_4$  (2 mmol, 220 mg) according to the general procedure afforded 387 mg (81%) of **3r** as a beige crystalline solid; mp 133 – 134  $^\circ\text{C}$ .  $^1\text{H}$  NMR (400 MHz,  $\text{DMSO}-d_6$ ):  $\delta$  = 8.48 (s, 1H), 8.11 (d,  $J$  = 8.0 Hz, 1H), 8.02 (d,  $J$  = 8.0 Hz, 1H), 7.70 (t,  $J$  = 8.0 Hz, 1H), 7.24 (s, 2H), 2.60 (s, 6H), 2.31 (s, 3H) ppm.  $^{13}\text{C}$  NMR (75 MHz,  $\text{CDCl}_3$ ):  $\delta$  = 144.7, 142.8, 136.9, 134.3 (q,  $J_{\text{CF}}$  = 34 Hz), 132.6, 130.5, 129.3, 128.4, 122.6 (q,  $J_{\text{CF}}$  = 272 Hz,  $\text{CF}_3$ ), 120.5, 112.1, 27.2, 21.3 ppm.  $^{19}\text{F}$  NMR (376 MHz,  $\text{DMSO}-d_6$ ):  $\delta$  = –61.25, –148.22 ppm. HRMS (ESI)  $m/z$  calcd for  $\text{C}_{16}\text{H}_{15}\text{F}_3\text{I}^+$ : 391.0171; found: 391.0164.

#### Mesityl(3-(trifluoromethyl)phenyl)iodonium hexafluorophosphate (**3s**)

The reaction of 3-iodobenzotrifluoride (**1b**, 1 mmol, 272 mg), mesitylene (**2d**, 150  $\mu$ L, 1.1 mmol), sulfuric acid (400  $\mu$ L),  $\text{NaPF}_6$  (2 mmol, 336 mg) according to the general procedure afforded 329 mg (80%) of **3s** as a beige crystalline solid; mp 165 – 166  $^\circ\text{C}$ .  $^1\text{H}$  NMR (400 MHz,  $\text{DMSO}-d_6$ ):  $\delta$  = 8.49 (s, 1H), 8.12 (d,  $J$  = 8.0 Hz, 1H), 8.02 (d,  $J$  = 8.4 Hz, 1H), 7.70 (t,  $J$  = 8.0 Hz, 1H), 7.24 (s, 2H), 2.60 (s, 6H), 2.31 (s, 3H) ppm.  $^{13}\text{C}$  NMR (75 MHz,  $\text{DMSO}-d_6$ : $\text{CDCl}_3$  6:1):

$\delta$  = 143.5, 141.7, 137.8, 132.8, 131.5 (q,  $J_{\text{CF}}$  = 33 Hz), 130.9, 129.9, 128.4, 122.9 (q,  $J_{\text{CF}}$  = 272 Hz,  $\text{CF}_3$ ), 122.5, 114.6, 26.4, 20.6 ppm.  $^{19}\text{F}$  NMR (376 MHz,  $\text{DMSO-d}_6$ ):  $\delta$  = -61.27, -70.11 (d,  $J_{\text{PF}}$  = 710 Hz) ppm. HRMS (ESI)  $m/z$  calcd for  $\text{C}_{16}\text{H}_{15}\text{F}_3\text{I}^+$ : 391.0171; found: 391.0171.

## References

1. Kamierczak P., Skulski L. *Synthesis* **1995**, 1027-10329.
2. McKerrow J. D., Al-Rawi J. M. A., Brooks P. *Synth. Commun.* **2010**, 40, 1161-1179.
3. Krysa A., Skulski L. *Molecules* **2001**, 6, 875-880.
4. Miralles, N., Romero, R. M., Fernández, E., Muñiz, K. *Chem. Commun.* **2015**, 51, 14068-14071.
5. Beringer F. M., Dehn Jr J. W., Winicov M. *J. Am. Chem. Soc.* **1960**, 82, 2948-2952.
6. Hossain, M. D., Kitamura, T. *Tetrahedron* **2006**, 62, 6955-696.

$^1\text{H}$ ,  $^{13}\text{C}$  and  $^{19}\text{F}$  NMR spectra

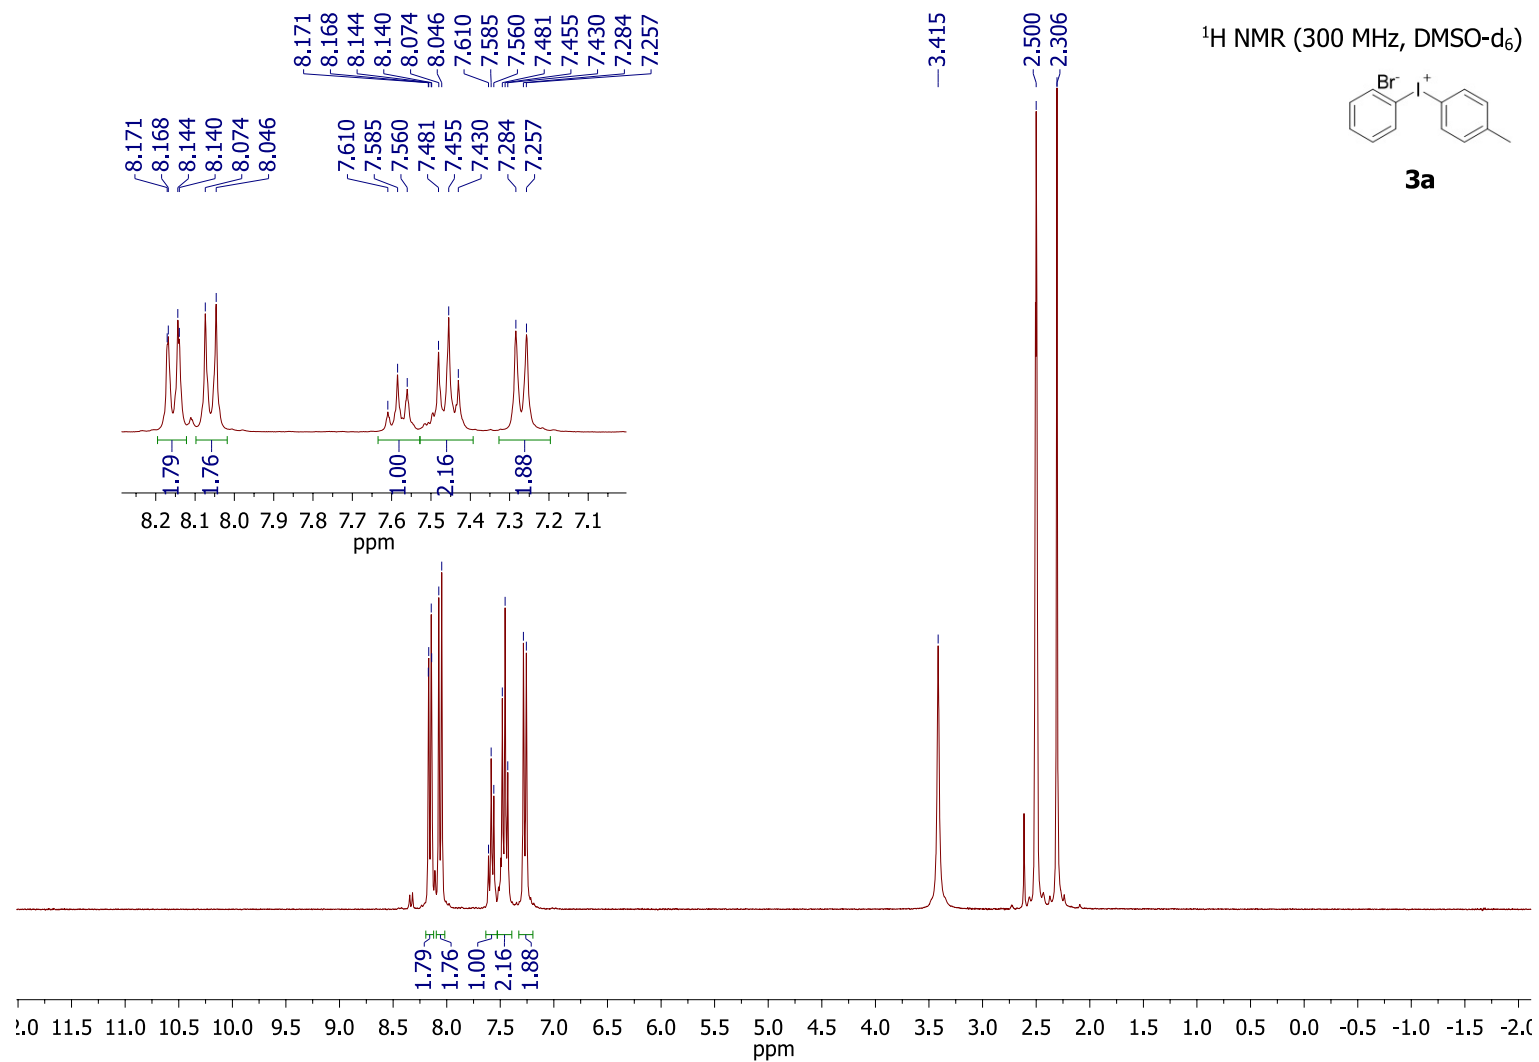

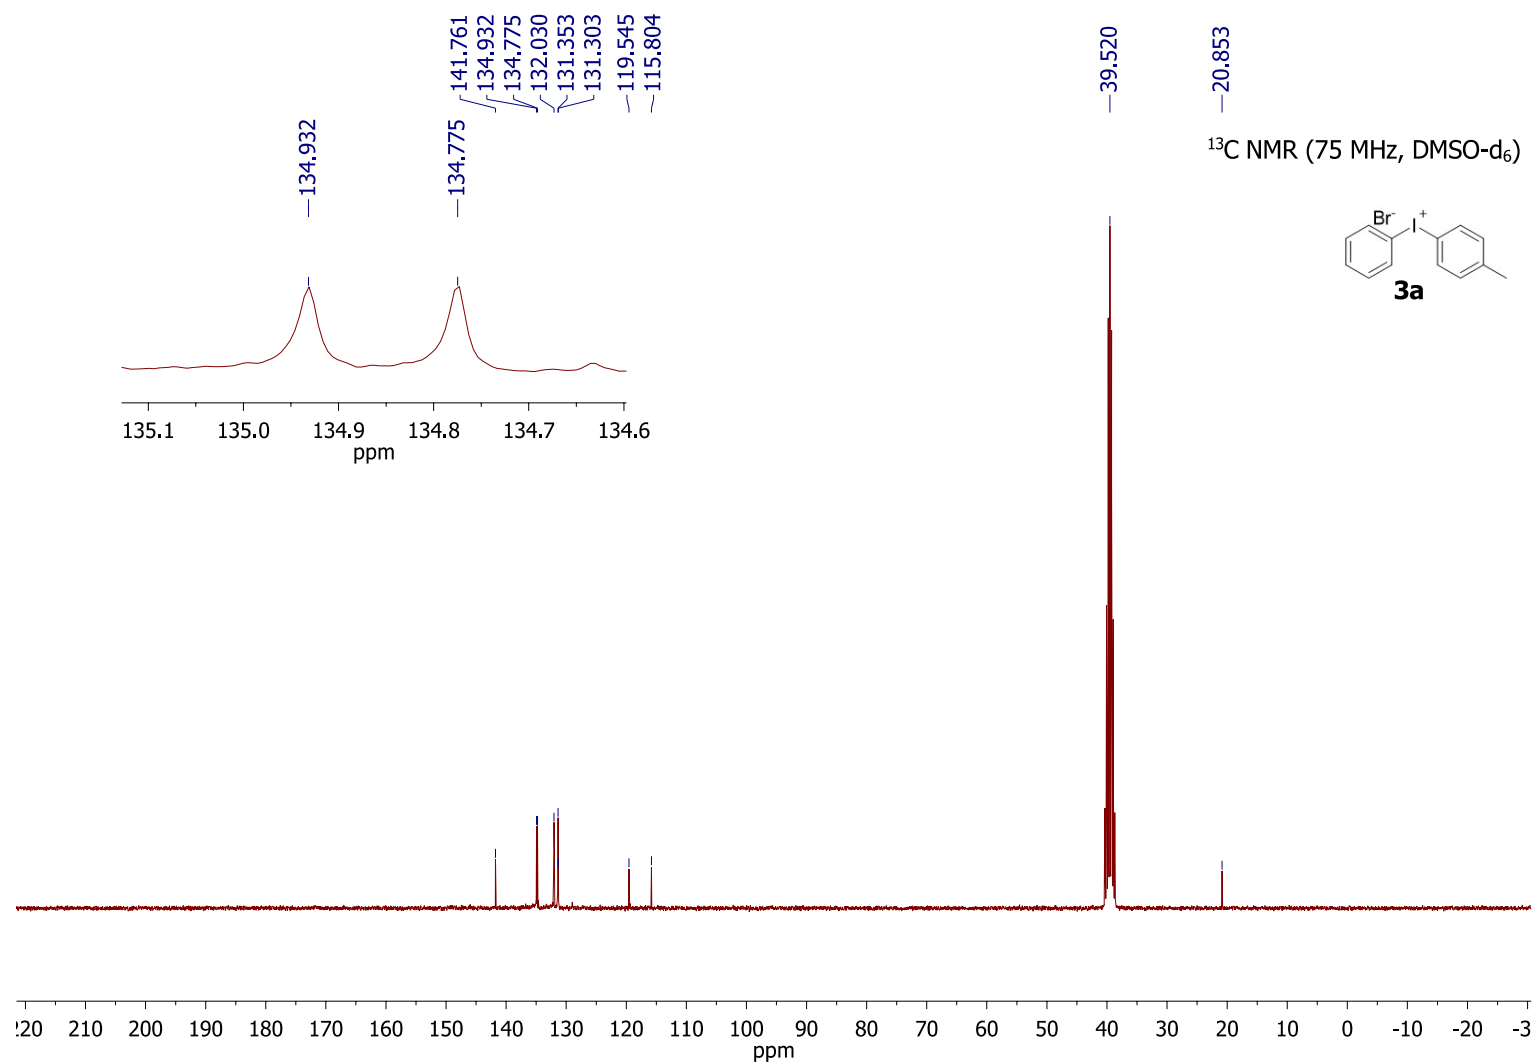

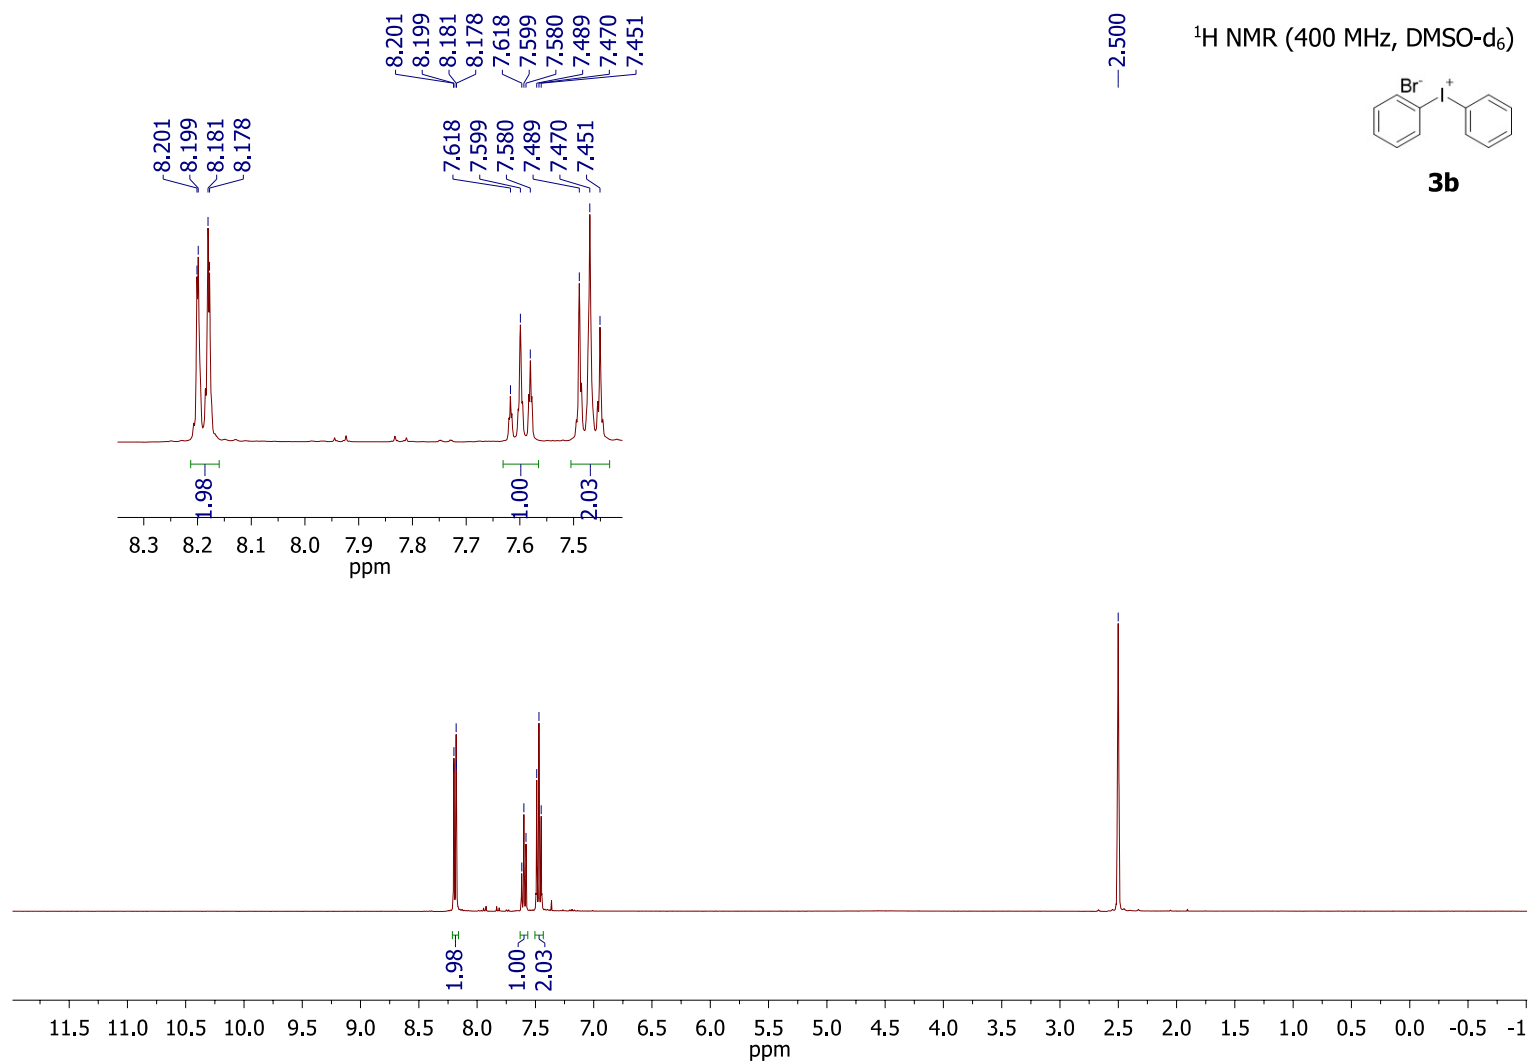

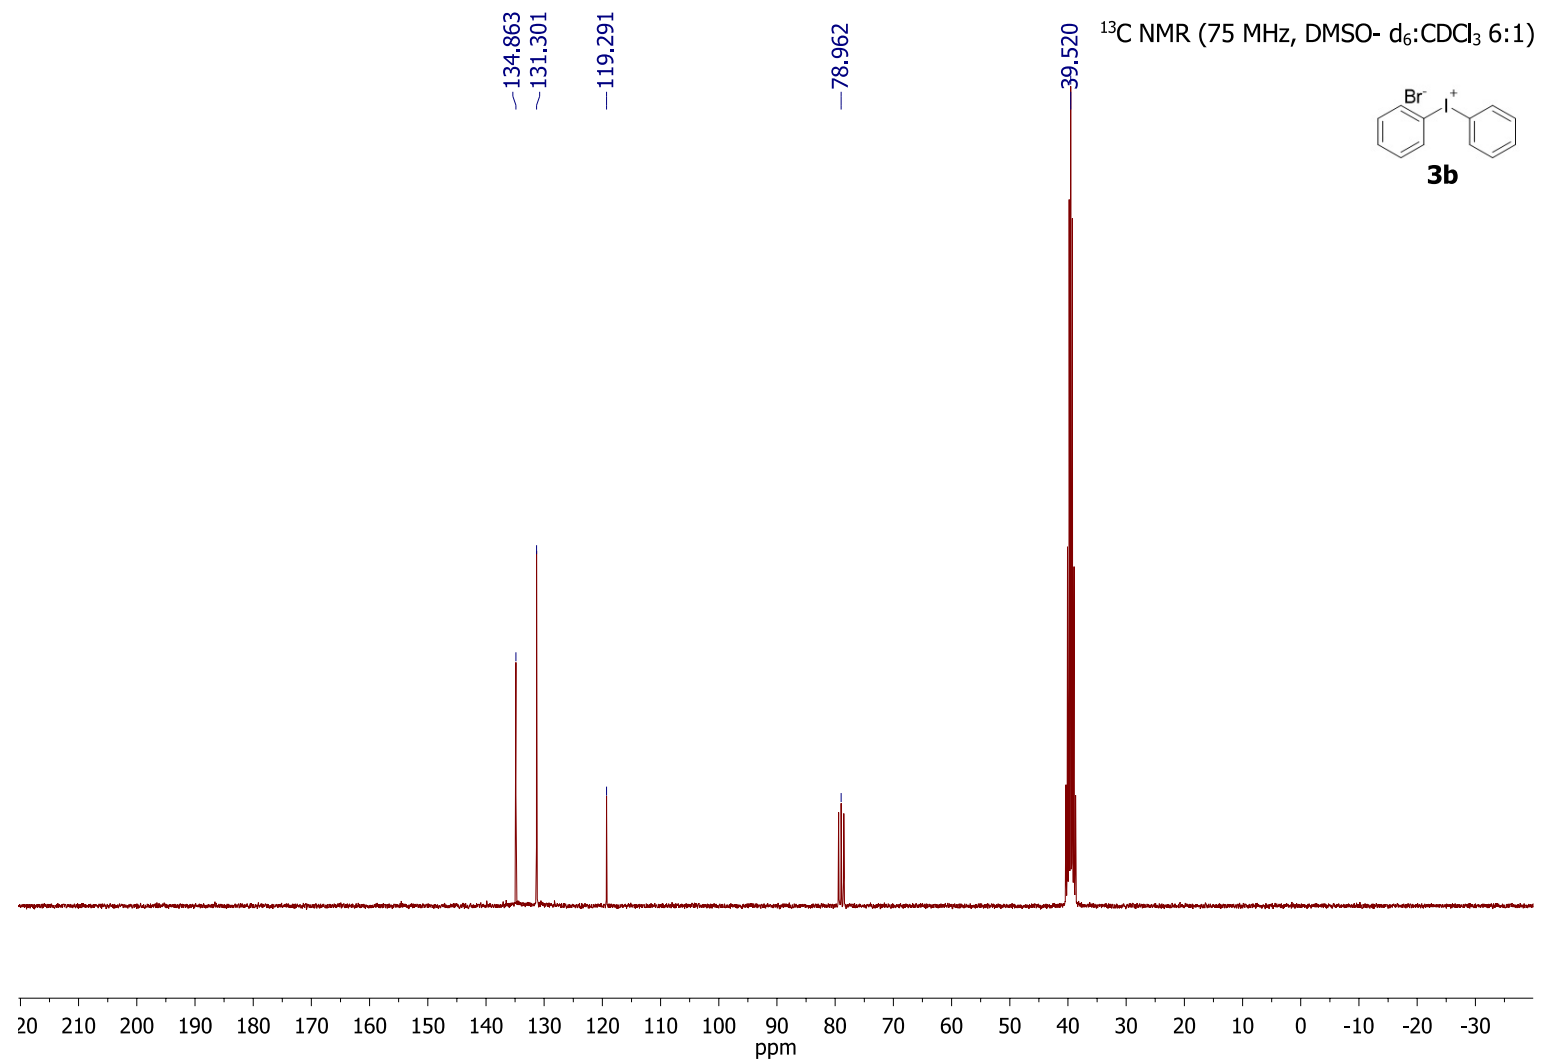

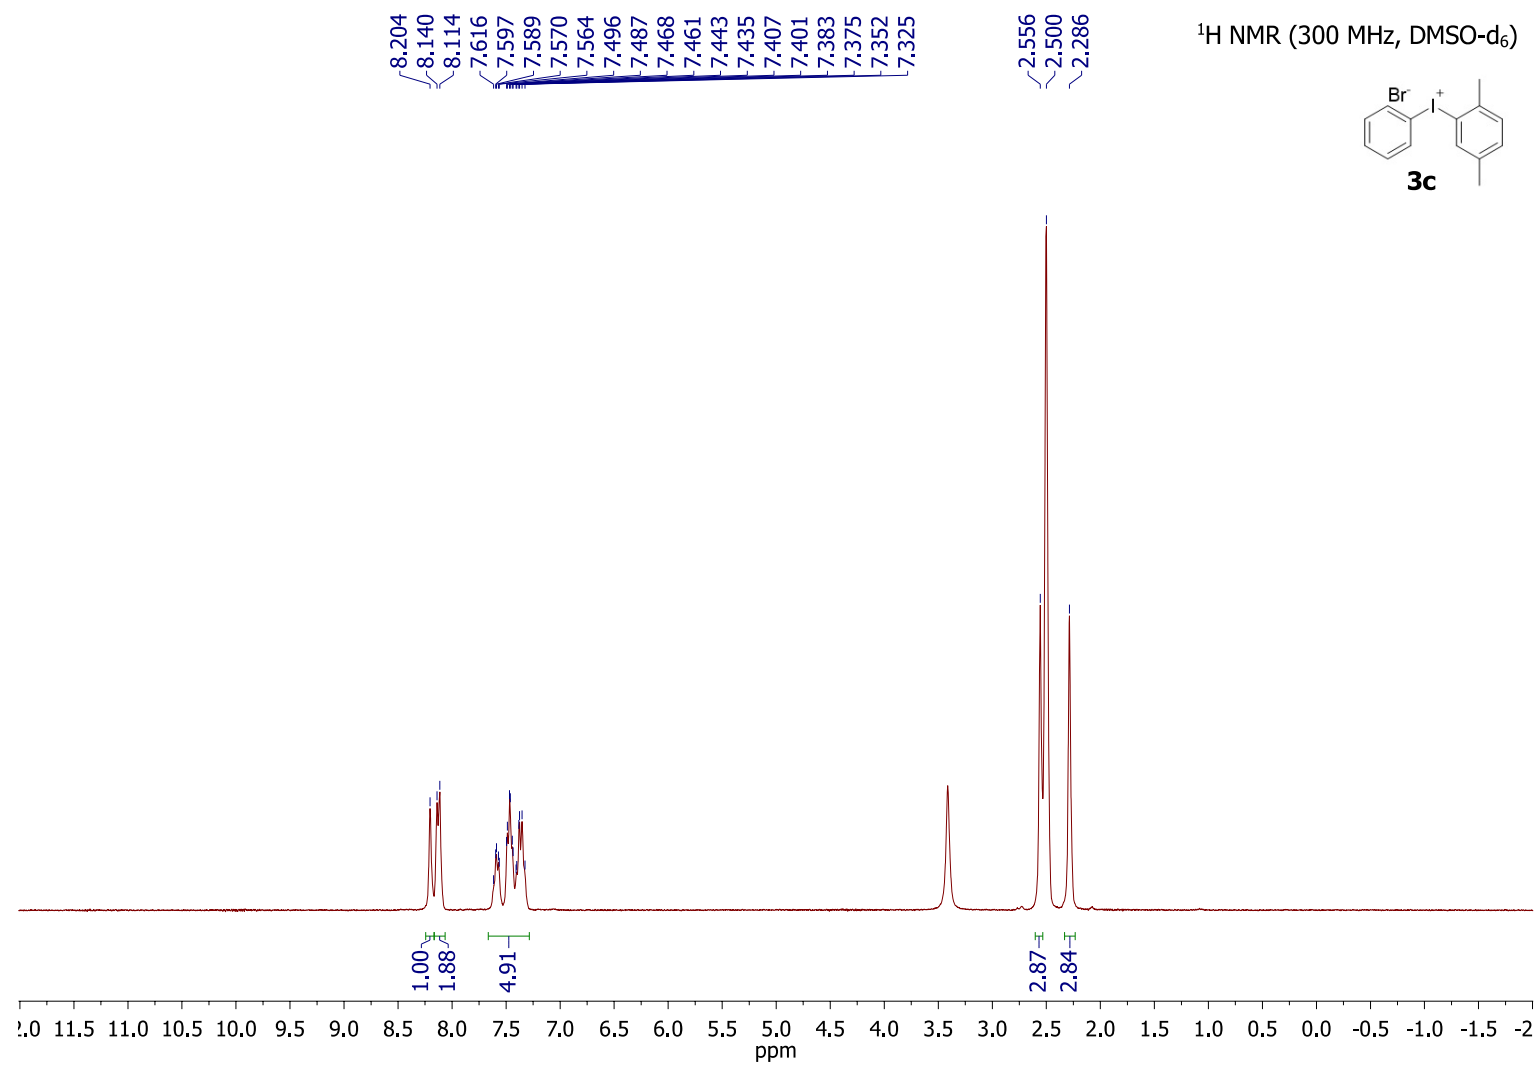

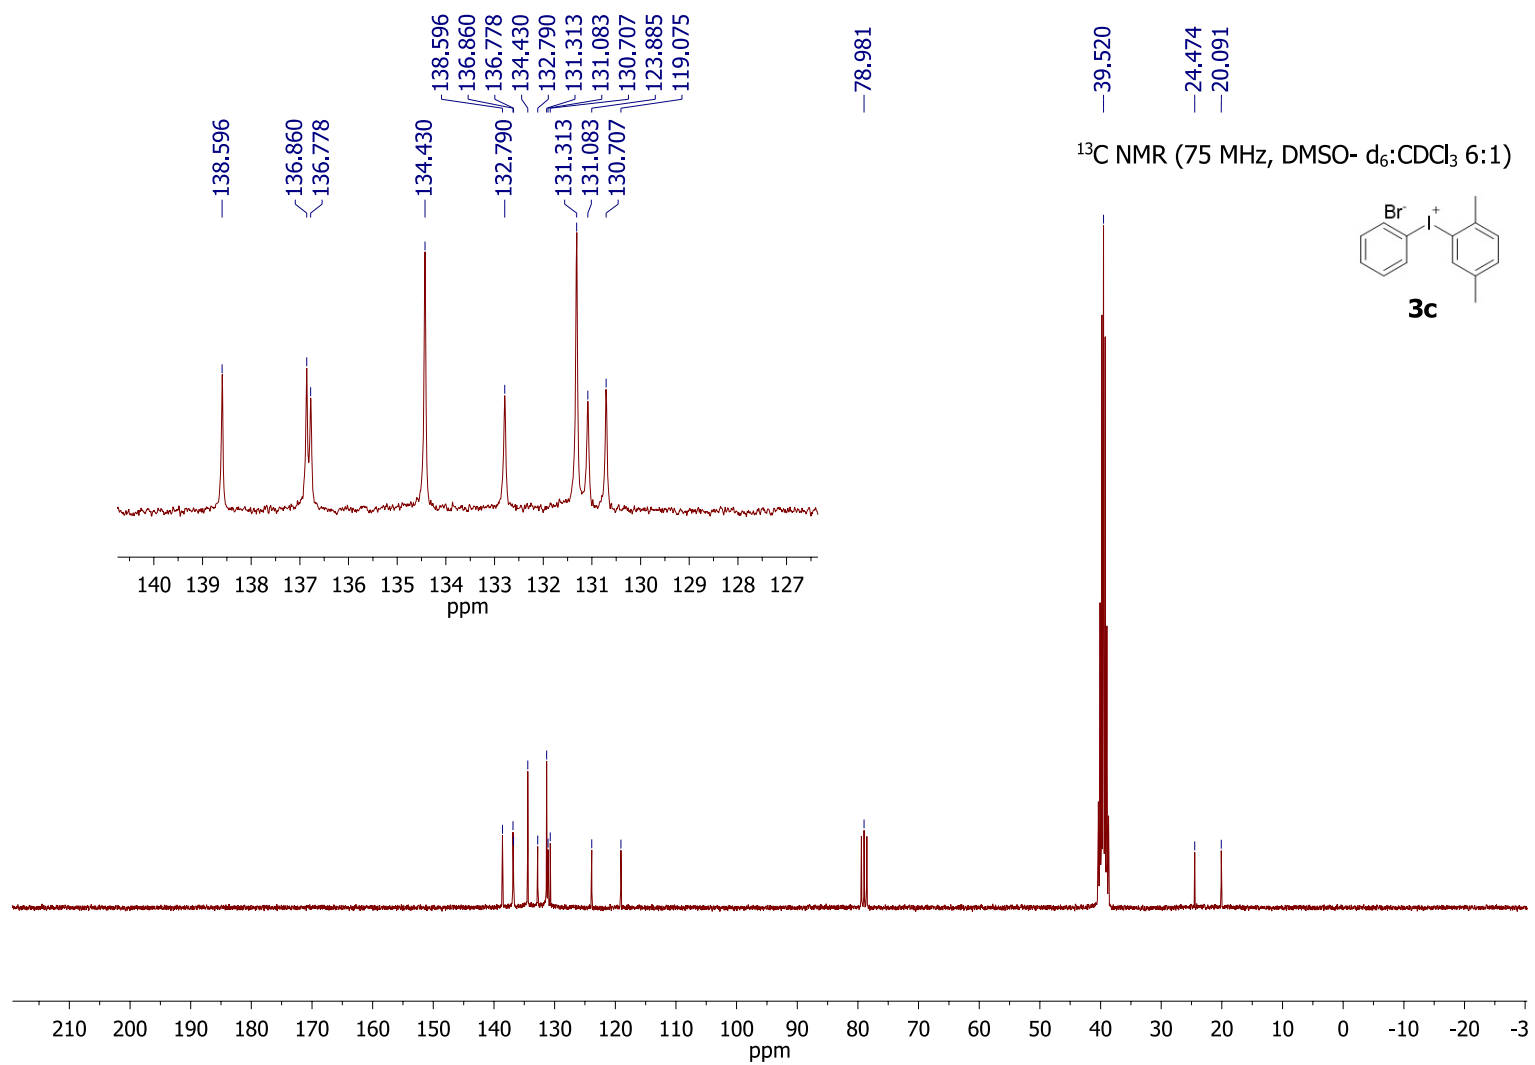

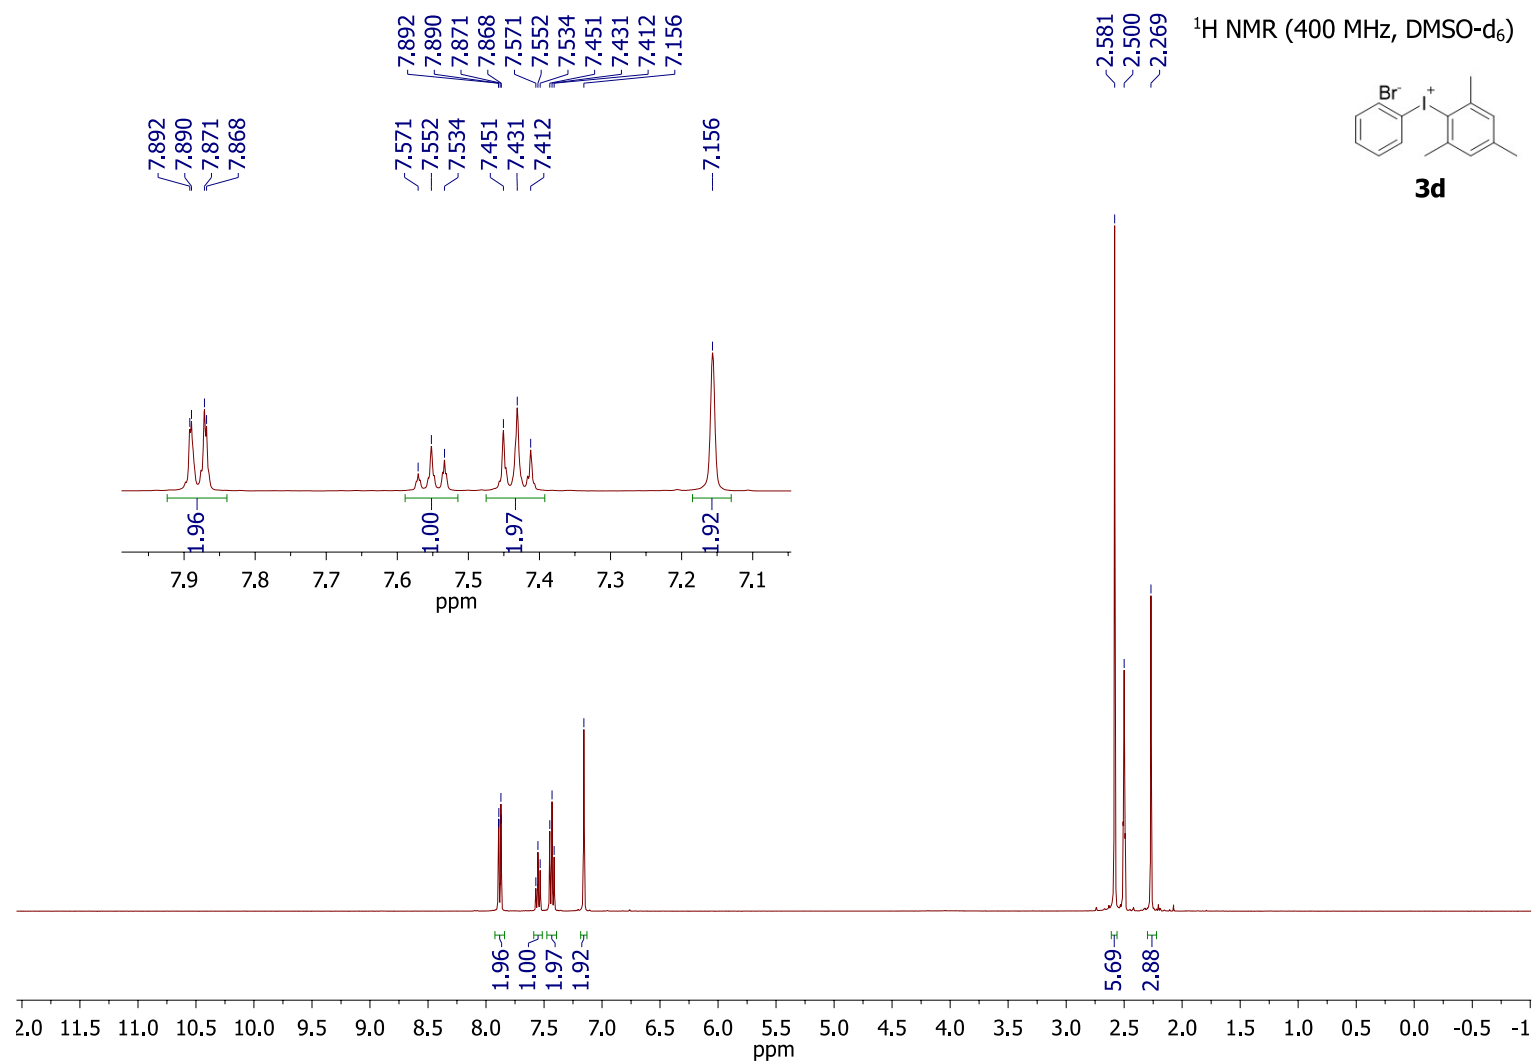

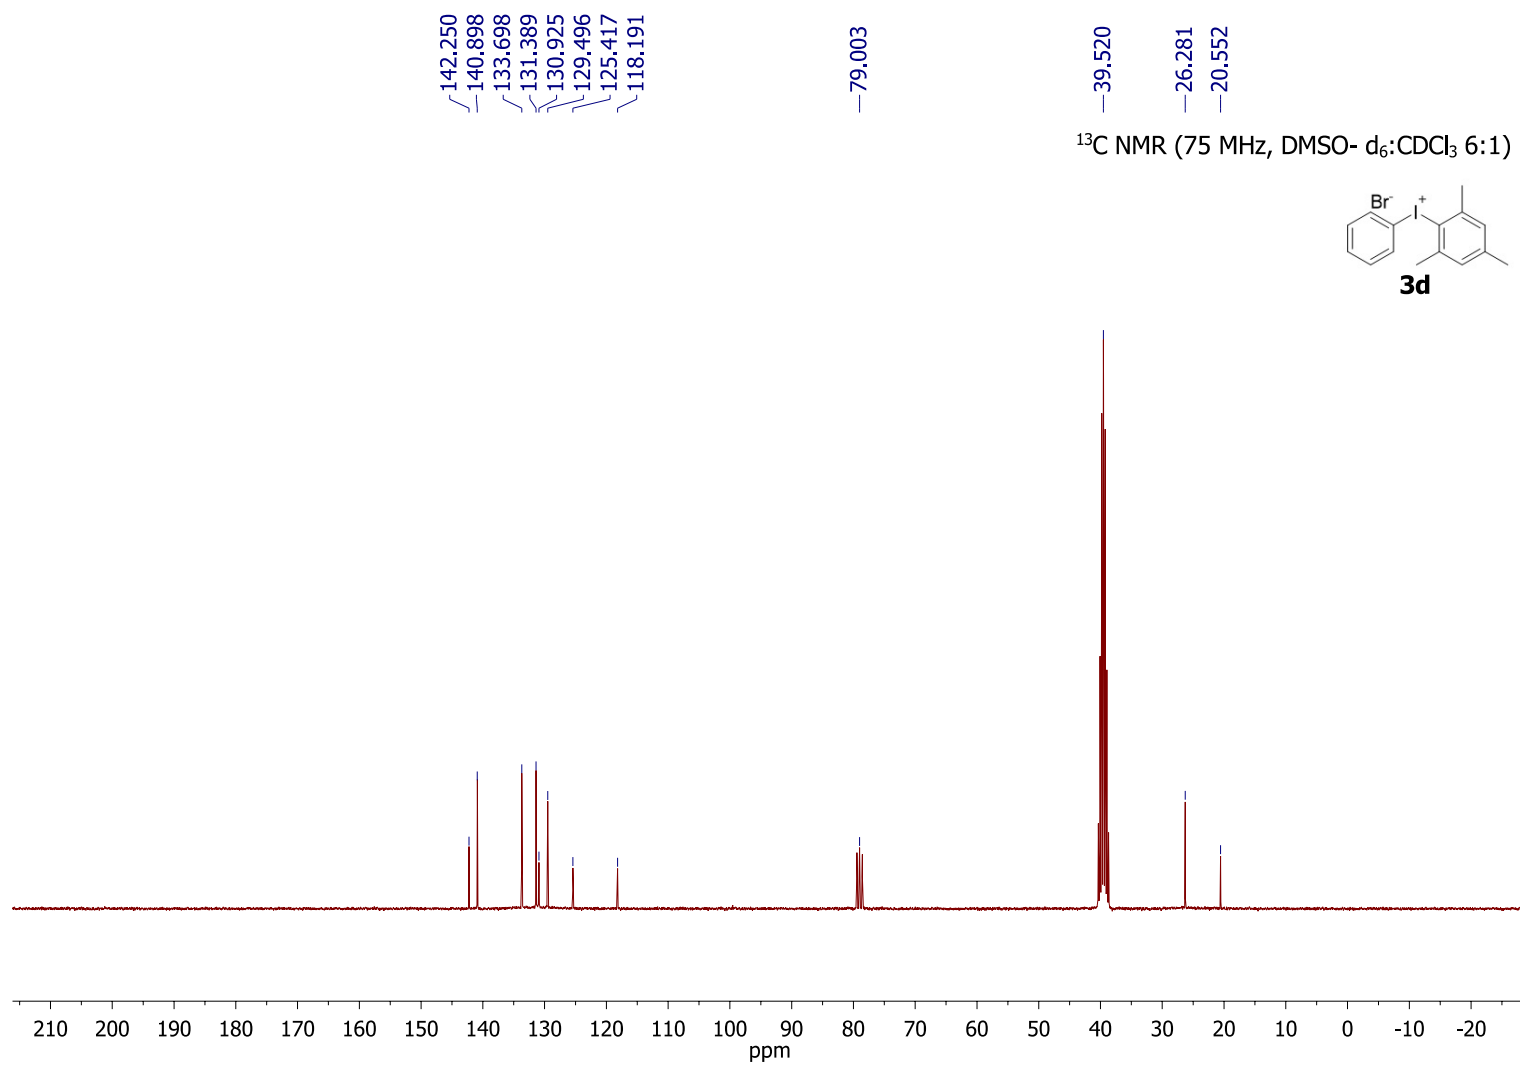

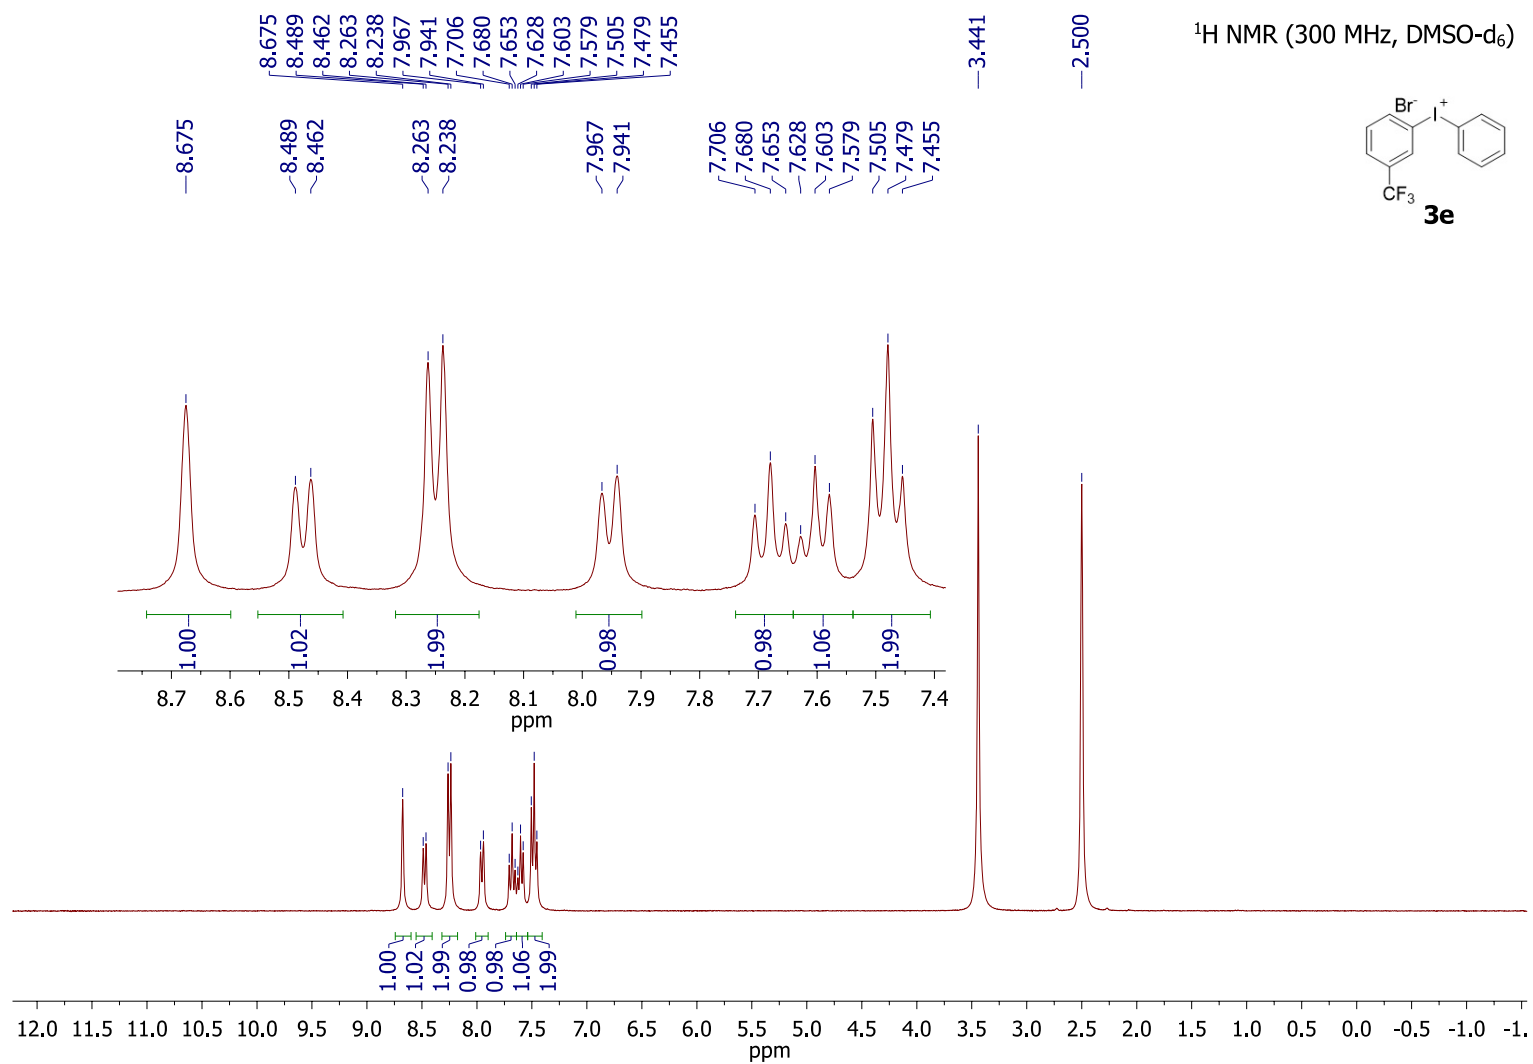

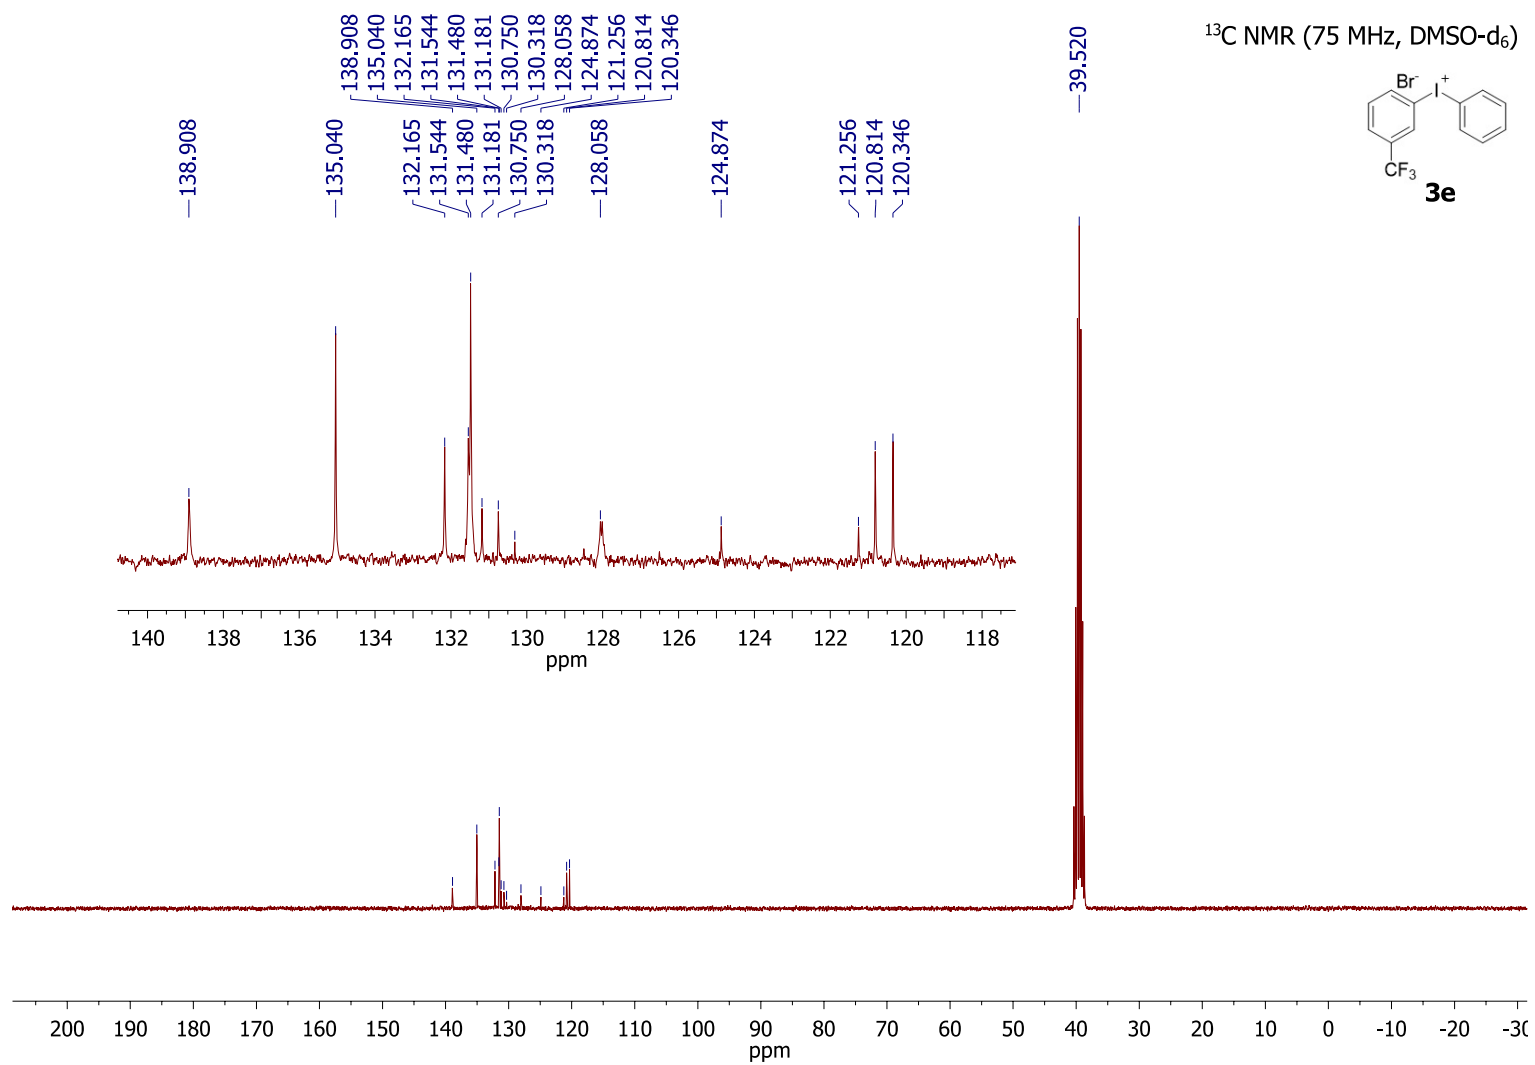

$^{19}\text{F}$  NMR (376 MHz, DMSO- $\text{d}_6$ )

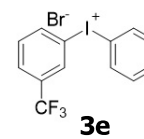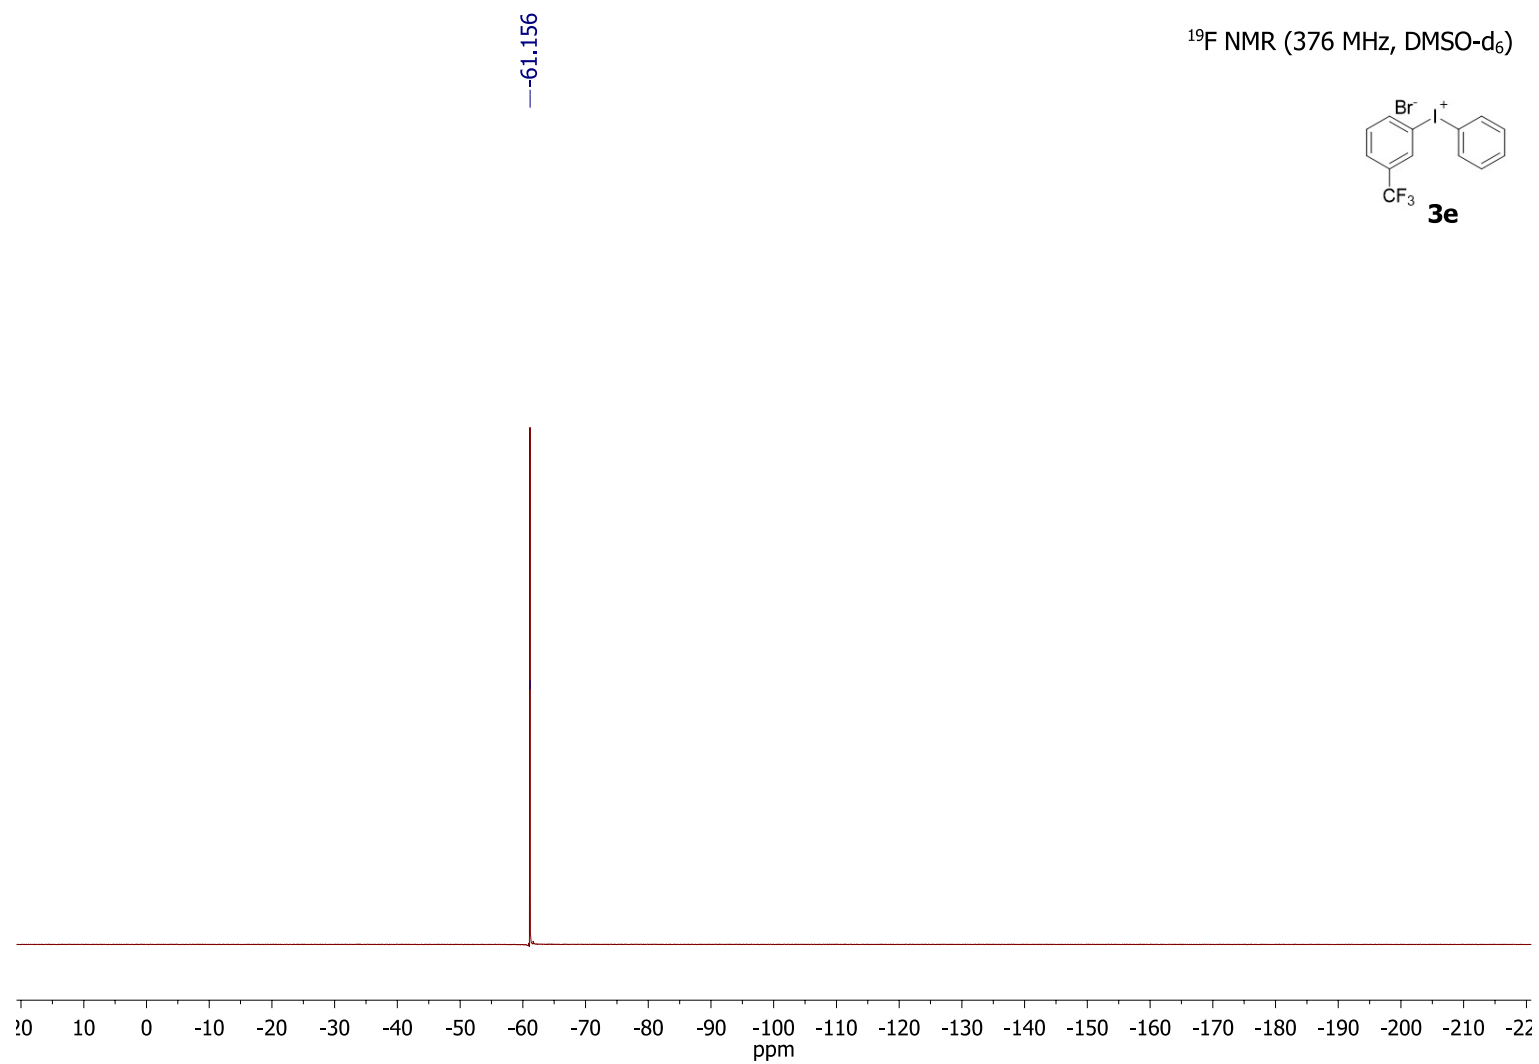

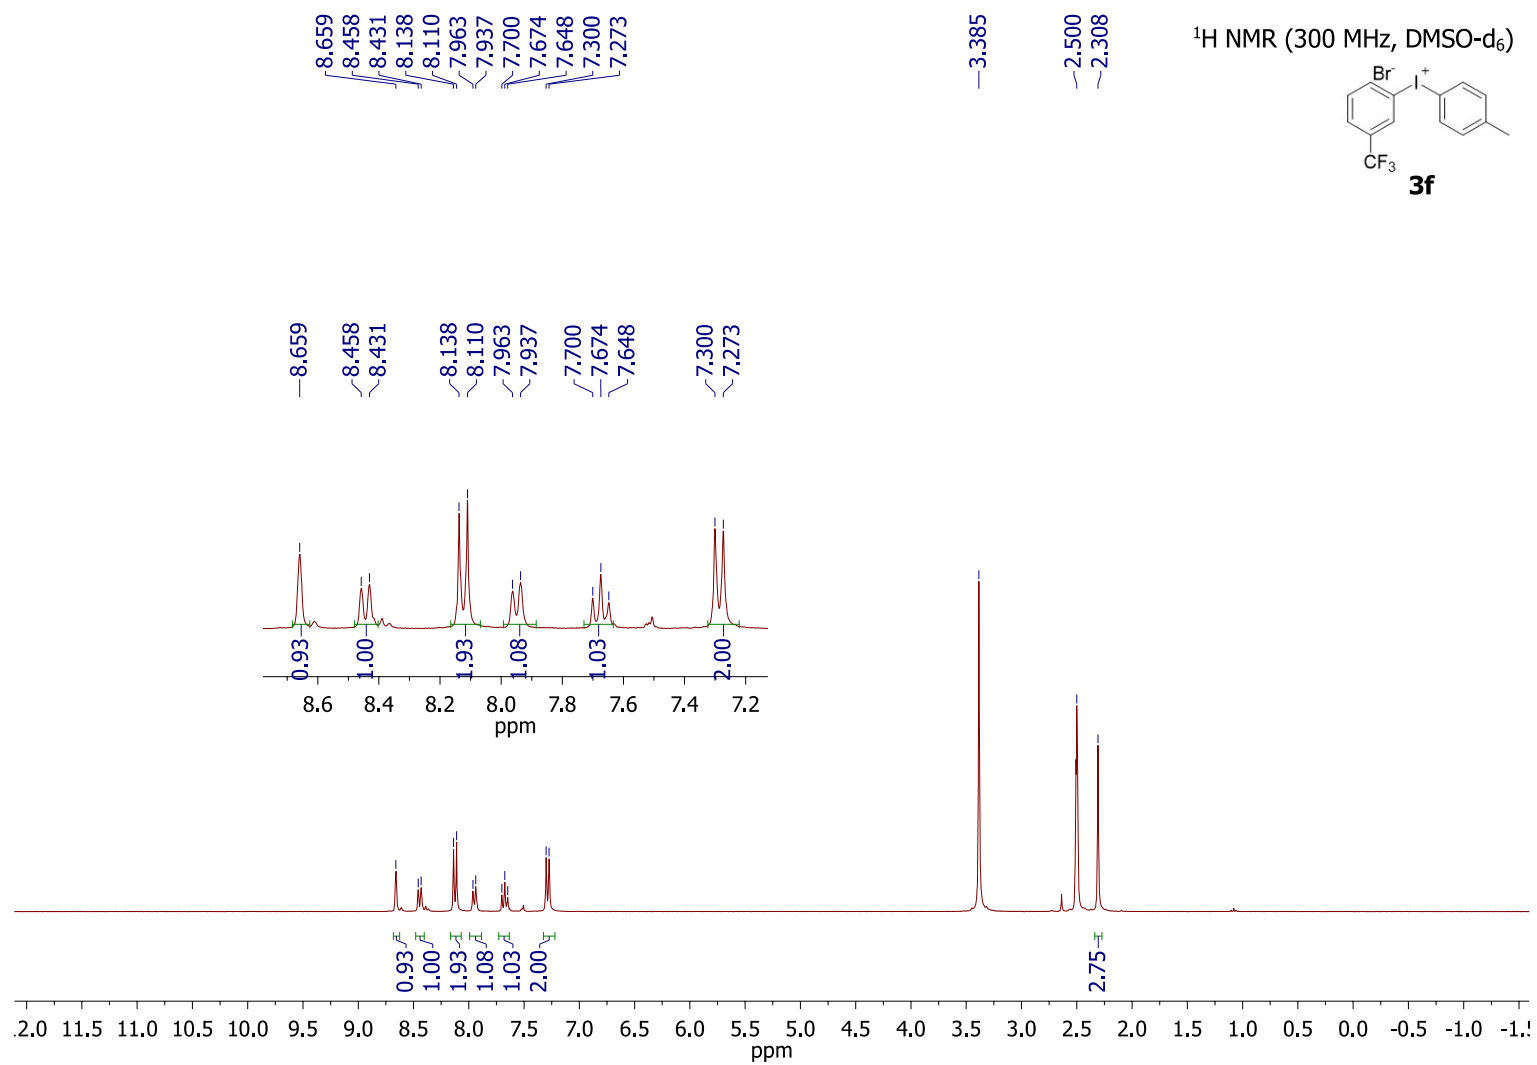

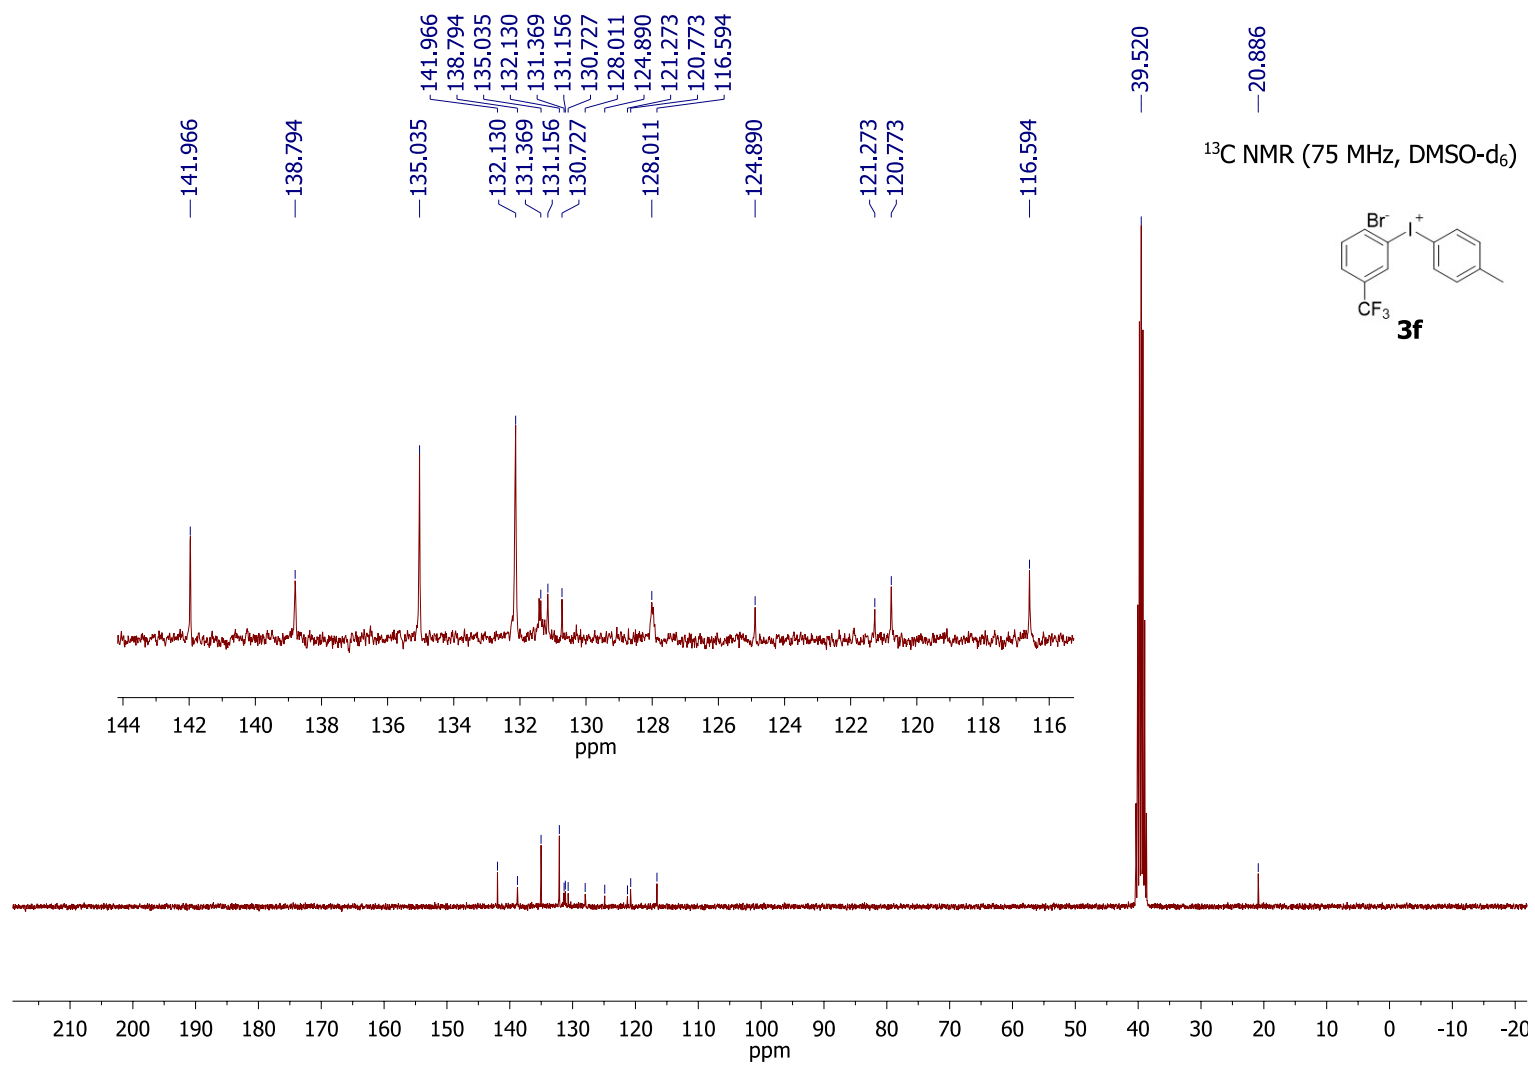

$^{19}\text{F}$  NMR (376 MHz,  $\text{CDCl}_3$ )

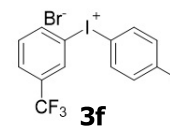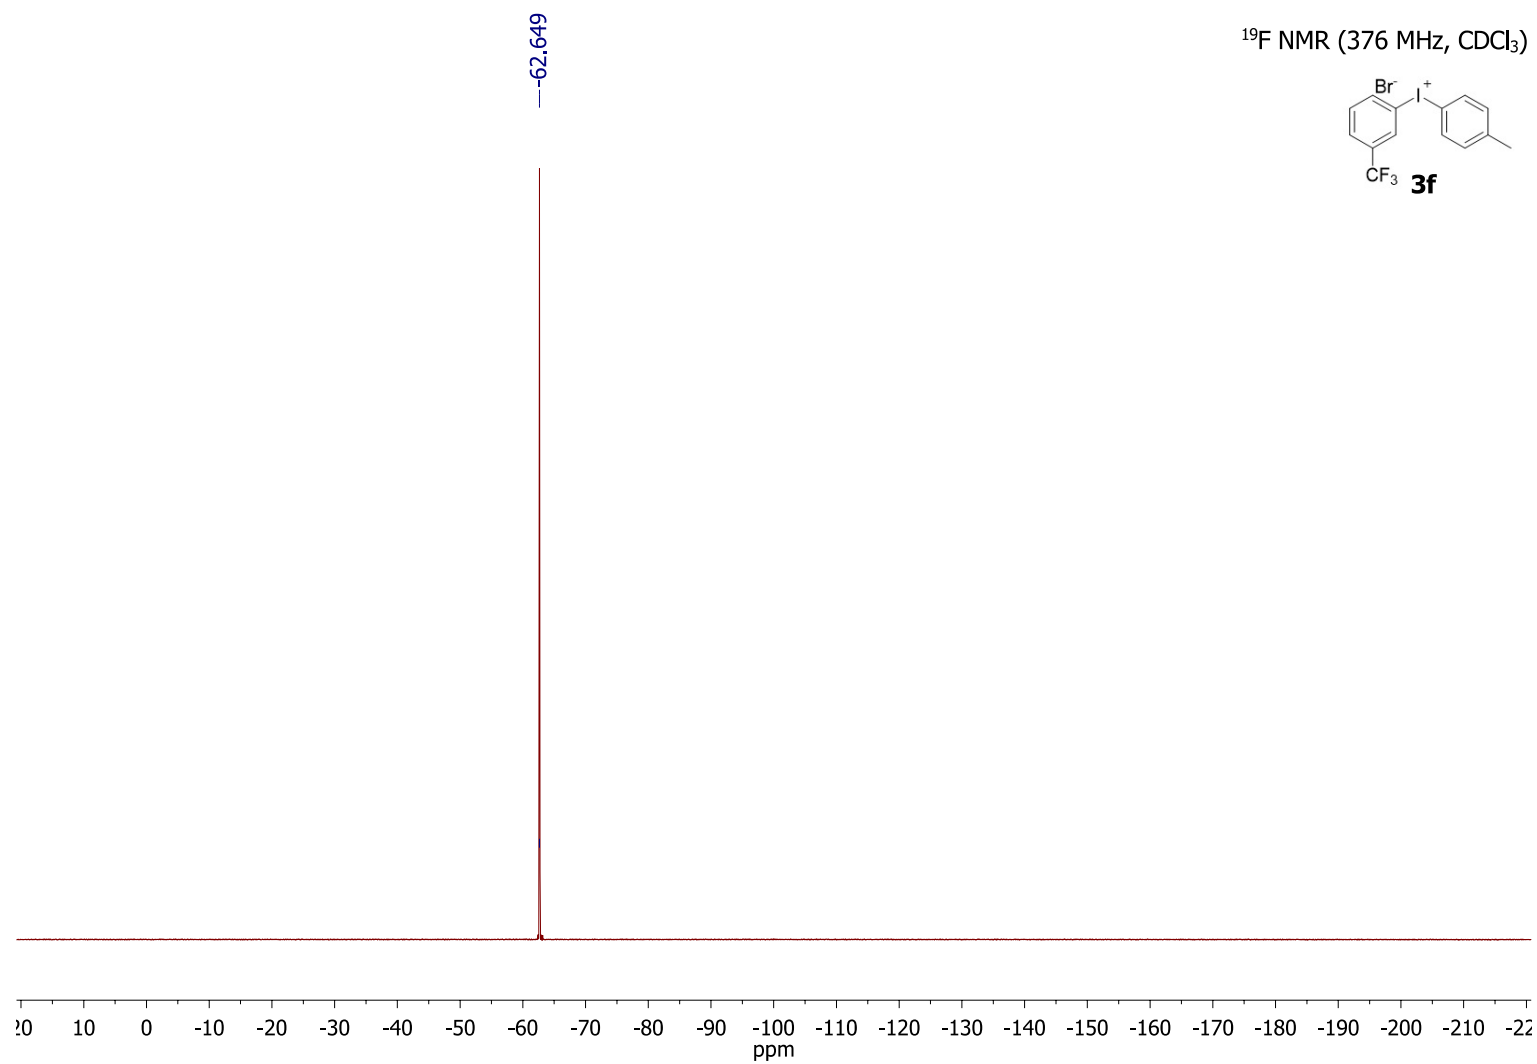

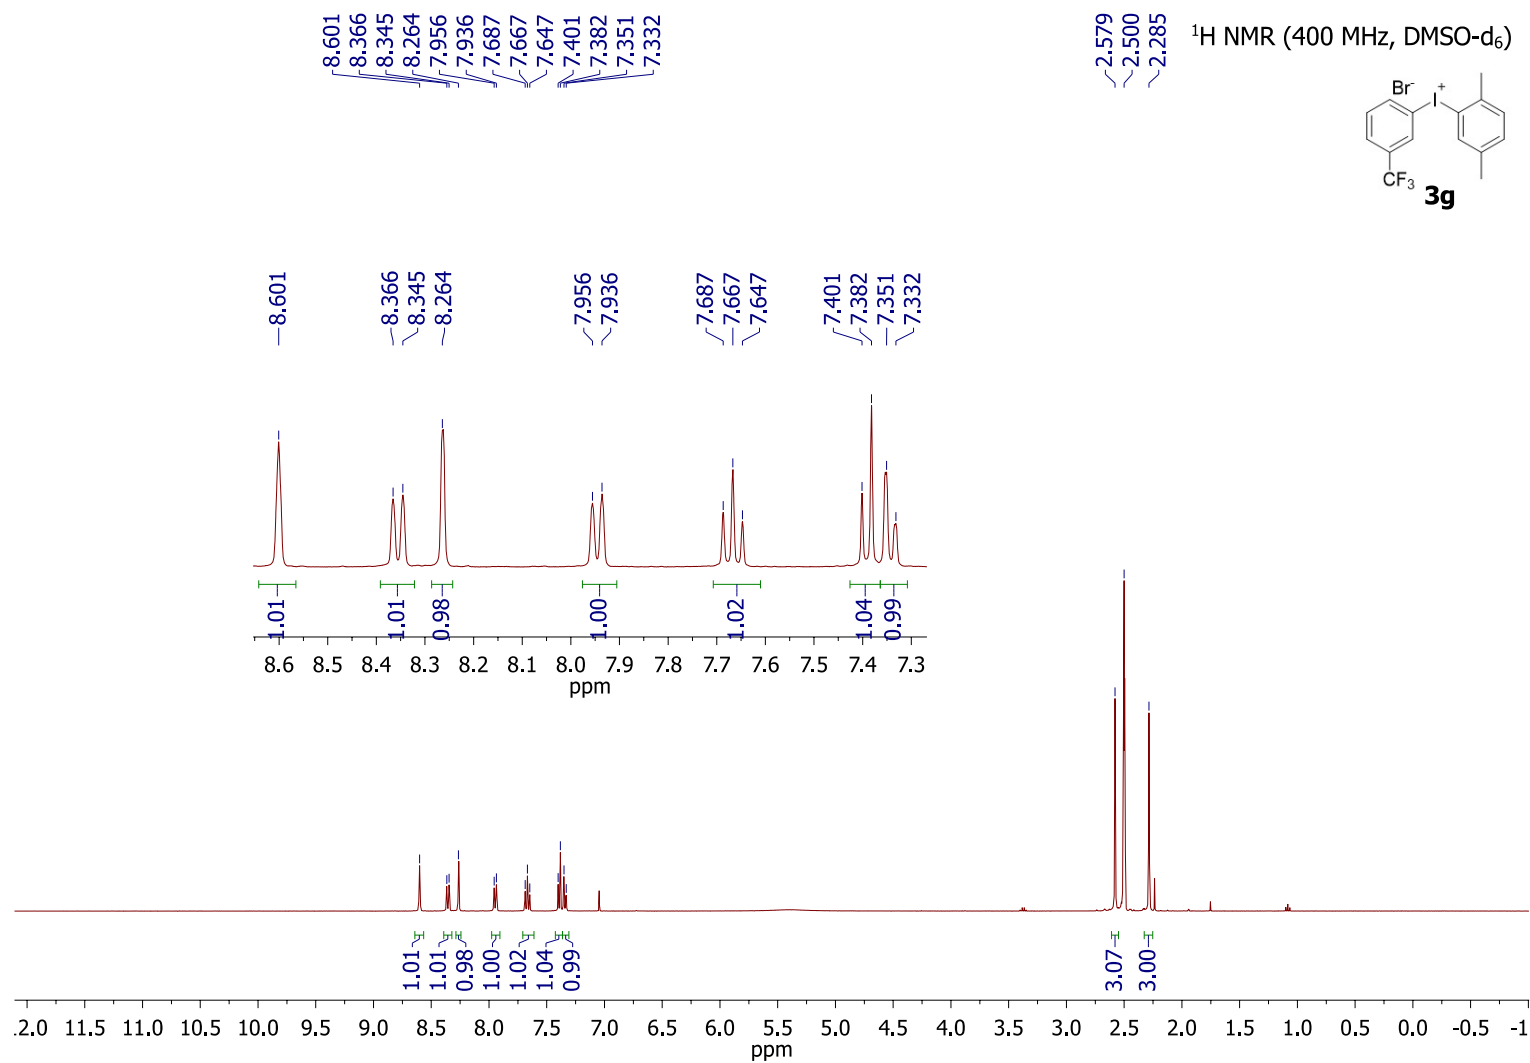

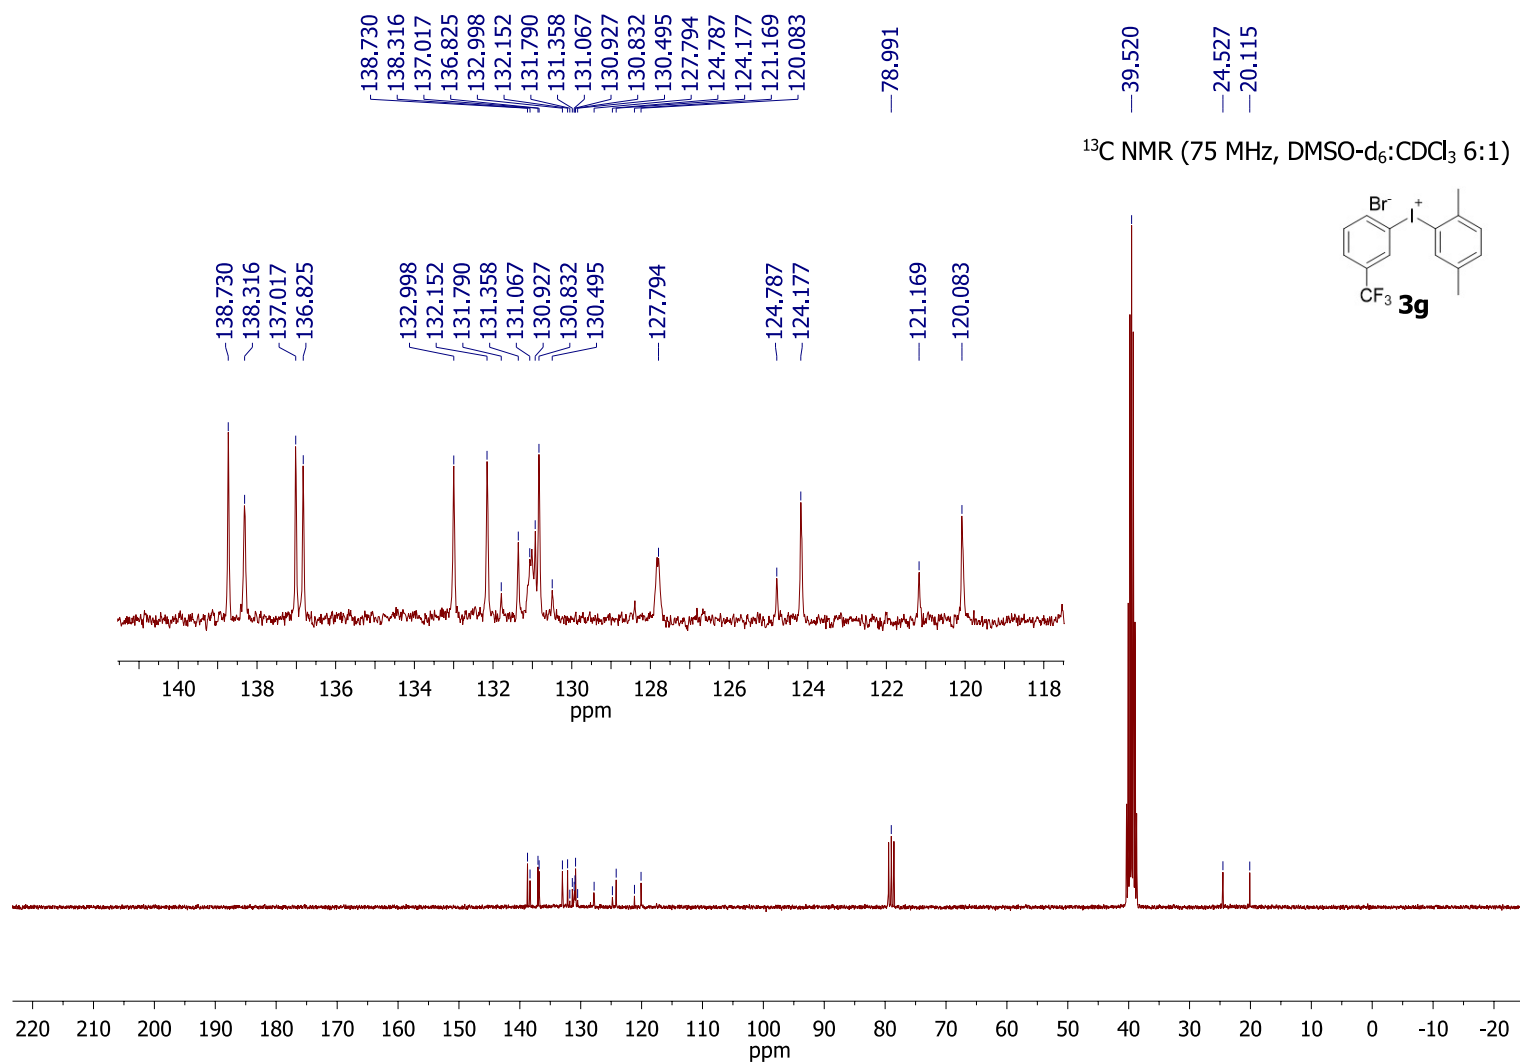

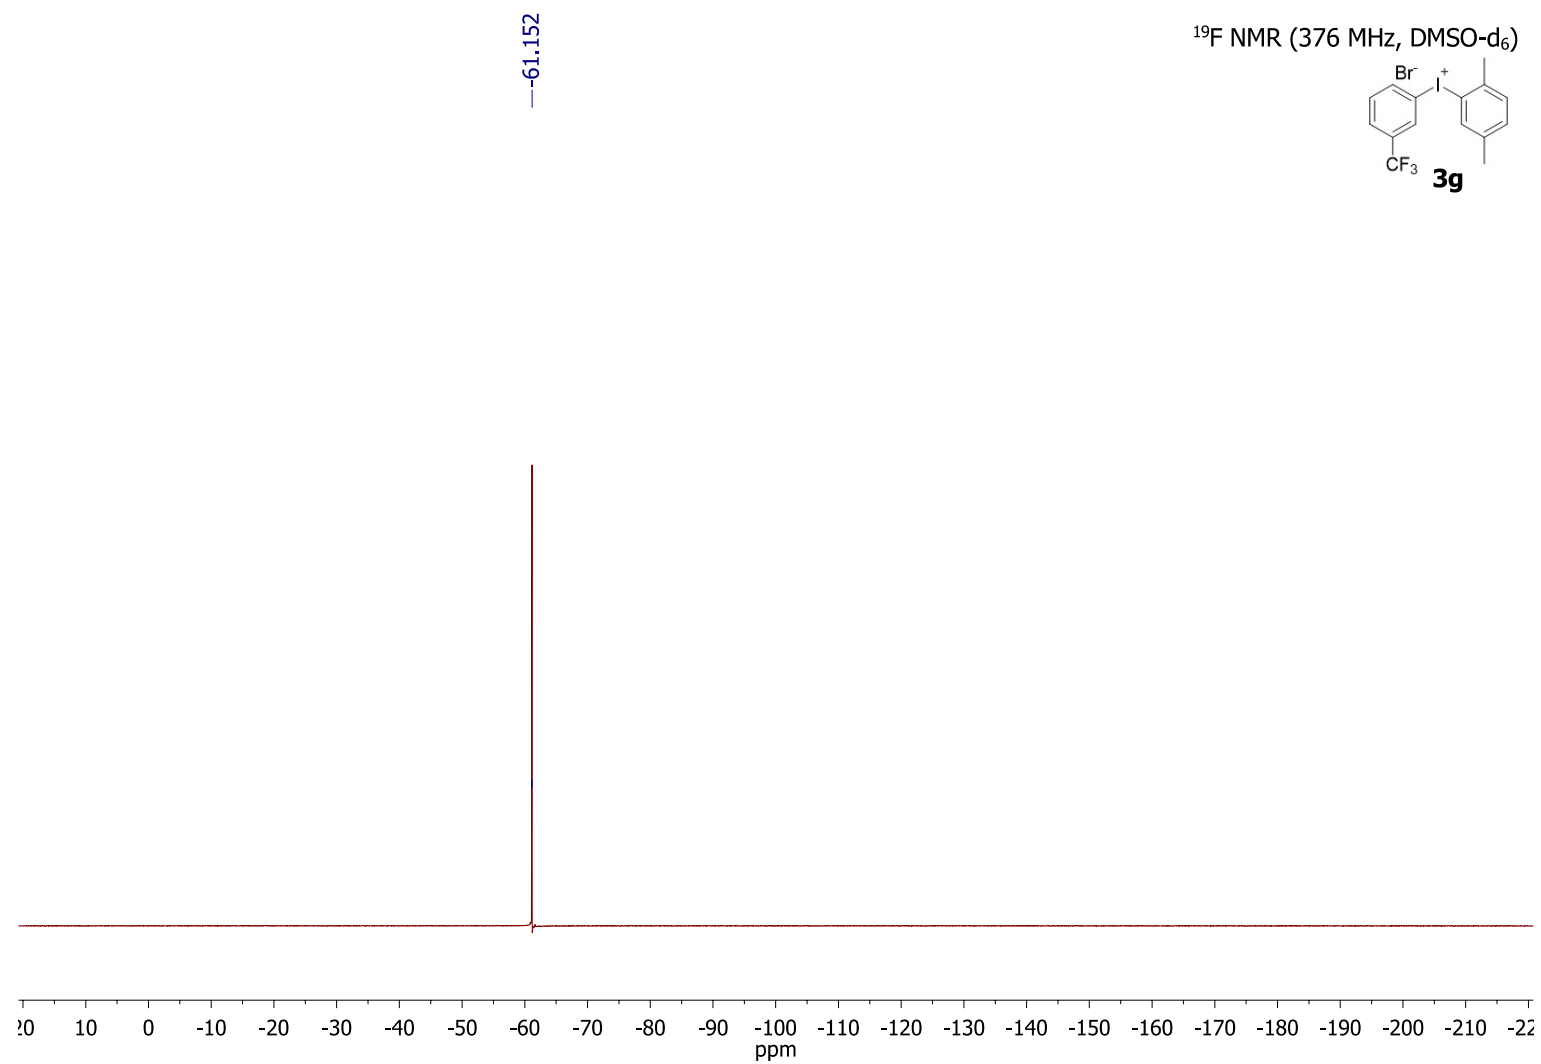



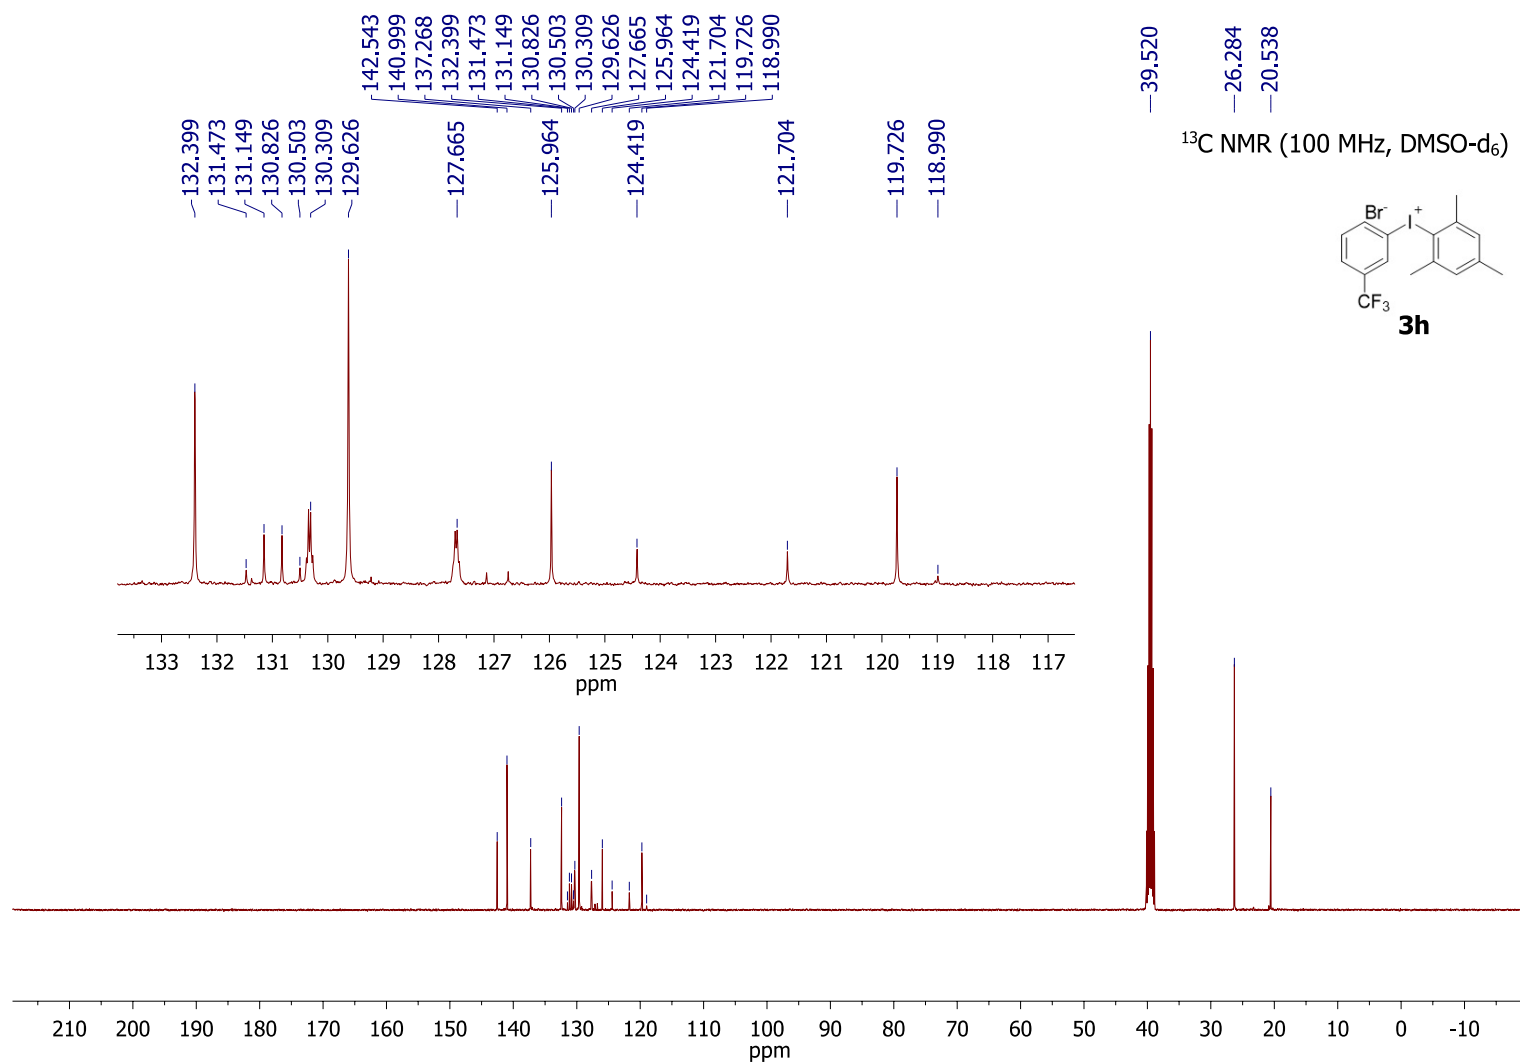

$^{19}\text{F}$  NMR (376 MHz,  $\text{DMSO-d}_6$ )

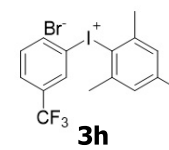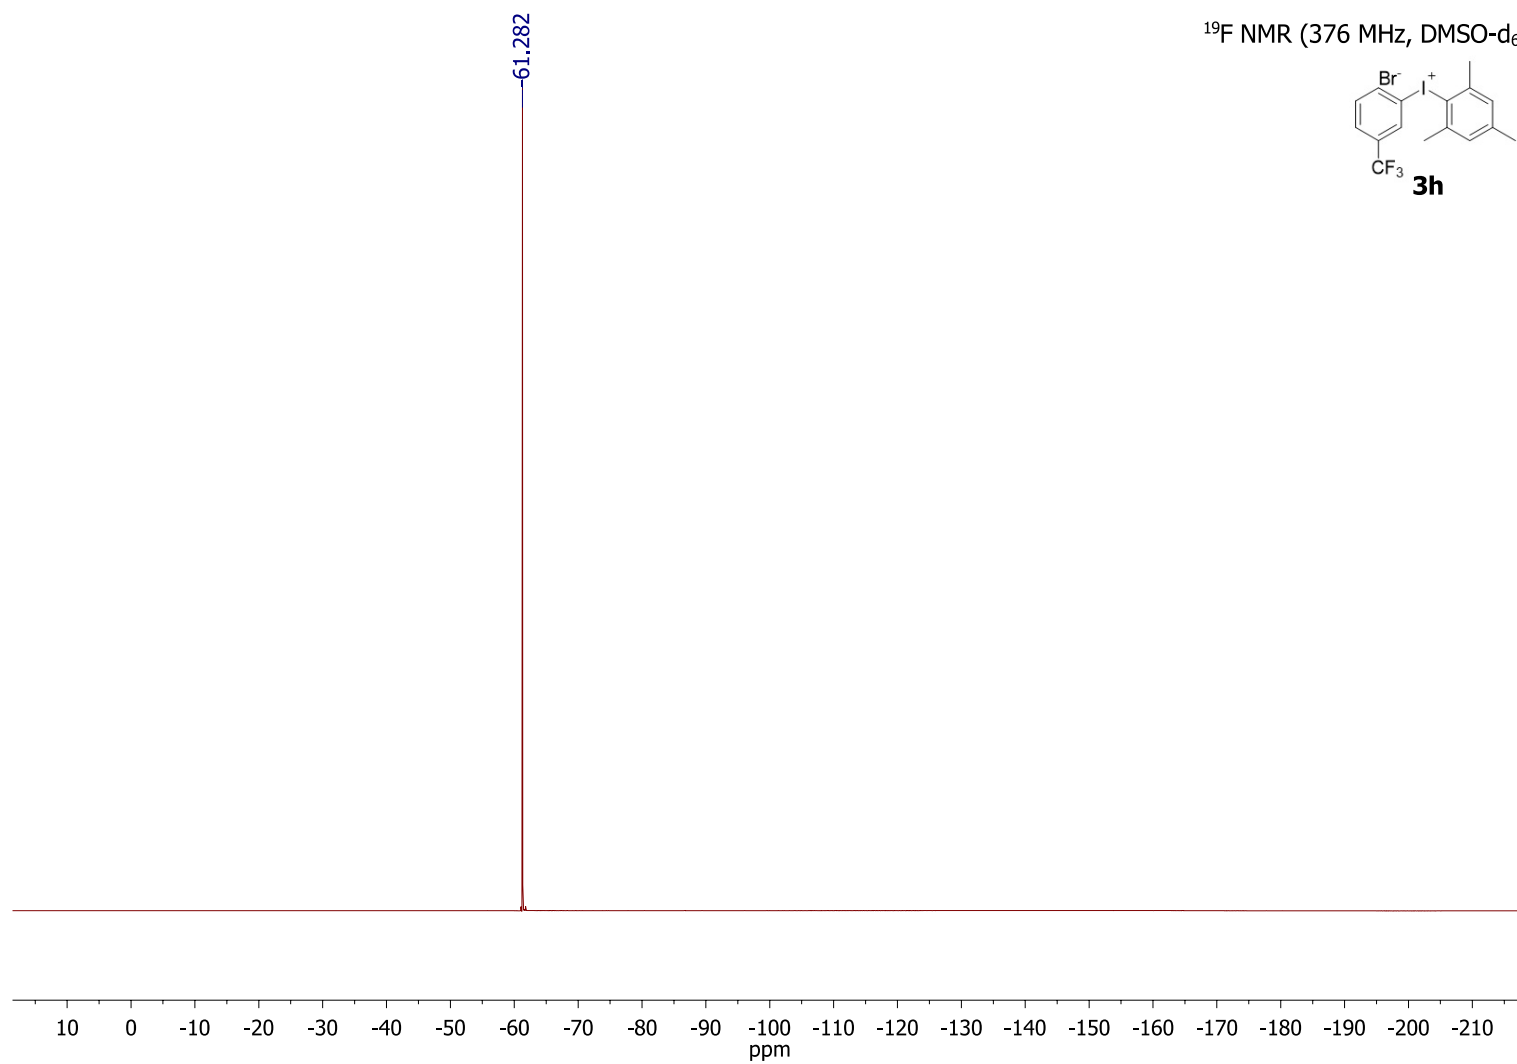

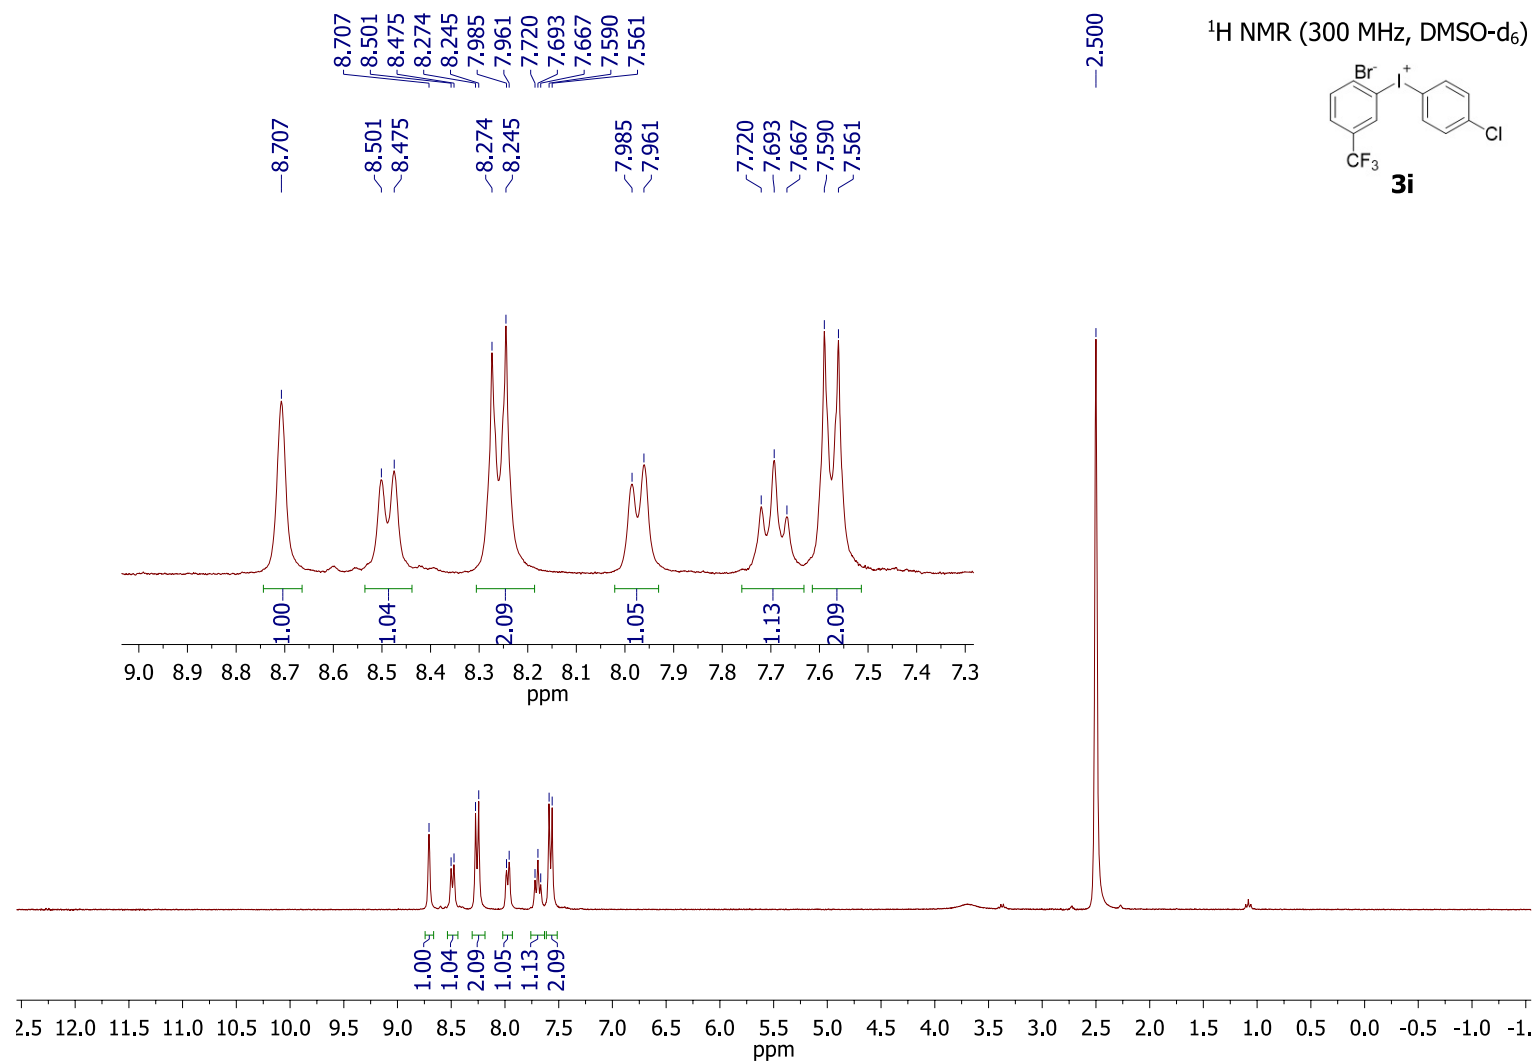

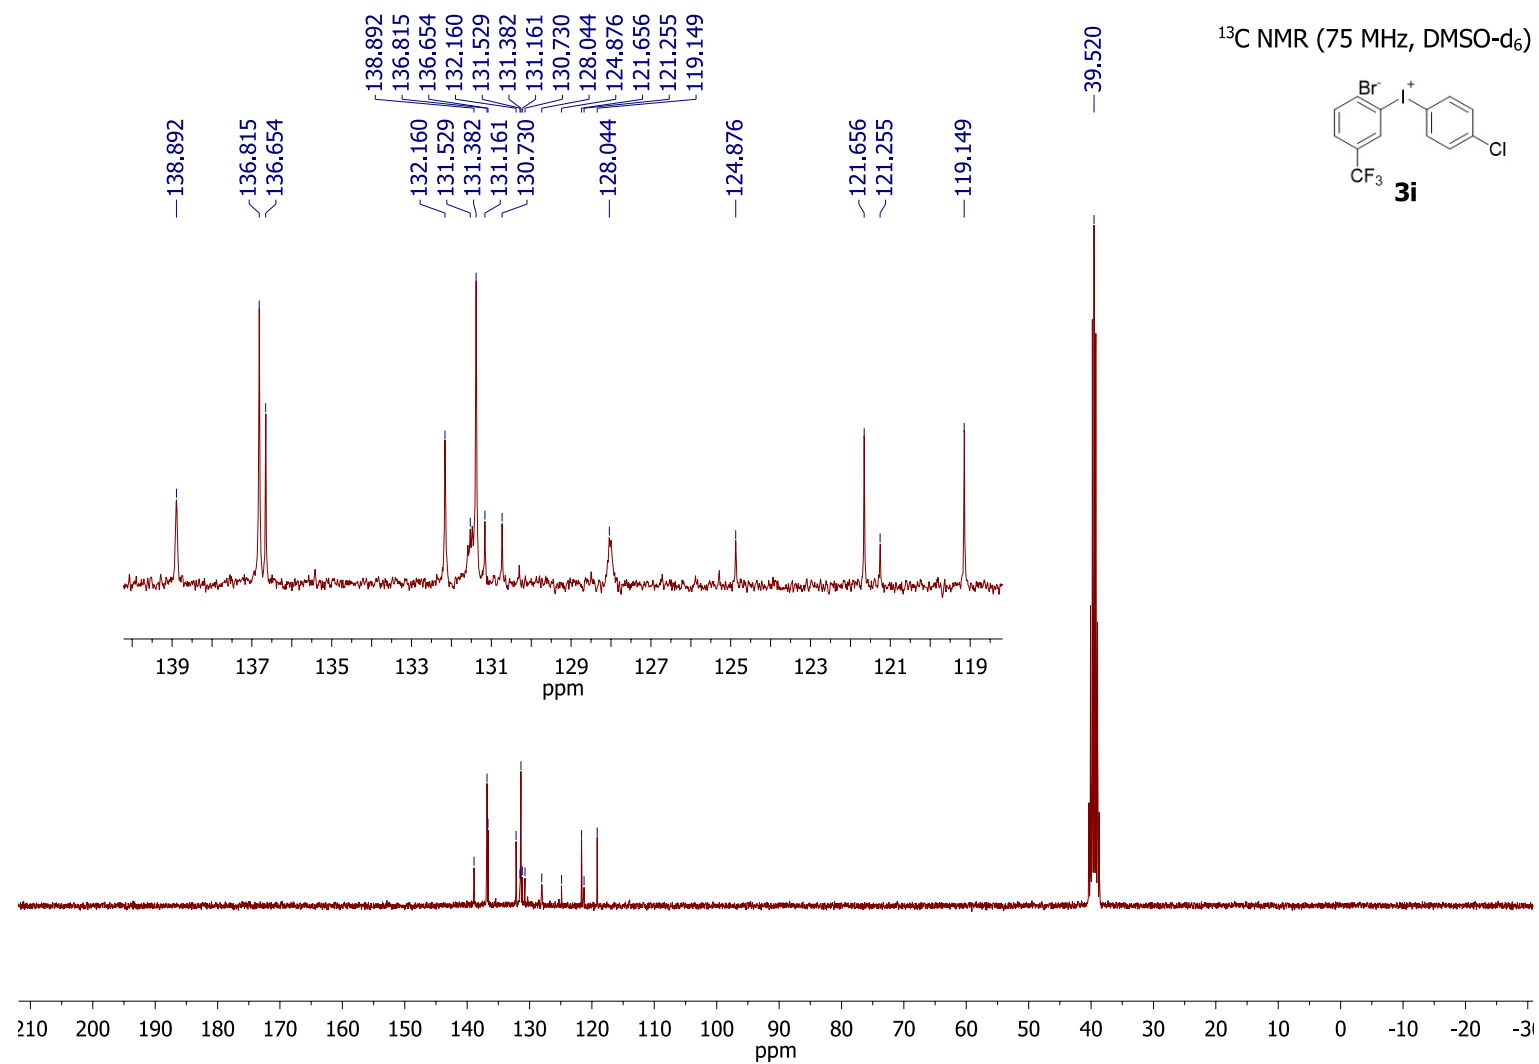

$^{19}\text{F}$  NMR (376 MHz, DMSO- $\text{d}_6$ )

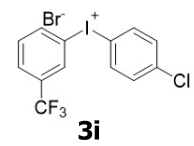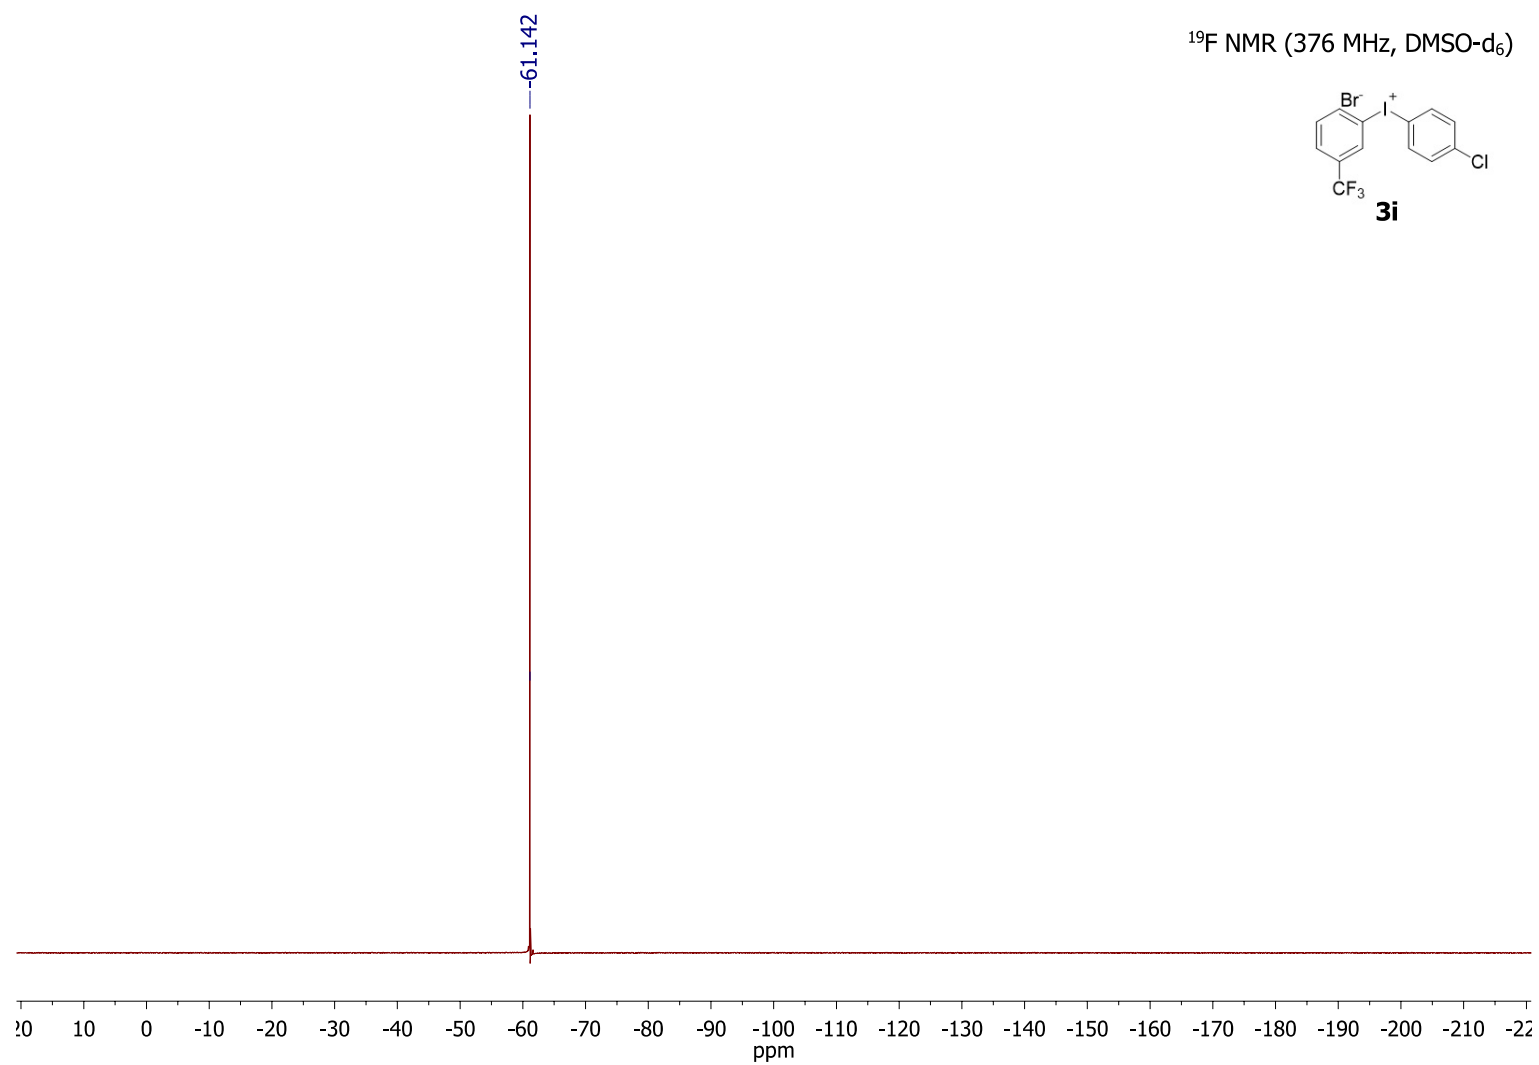

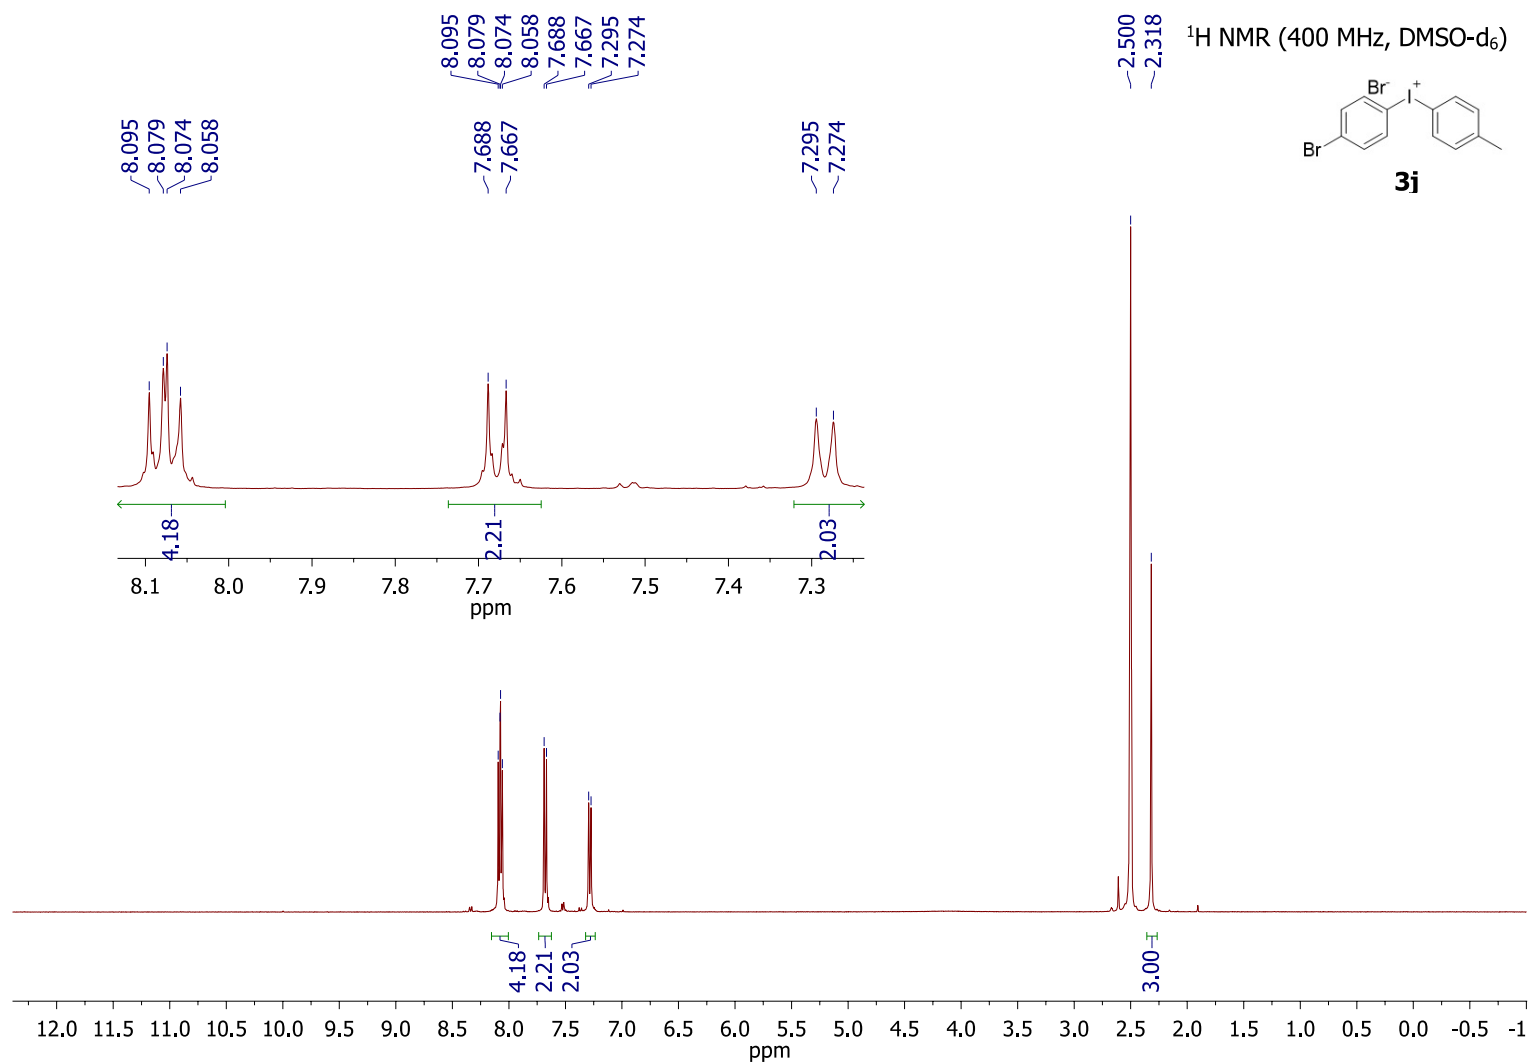

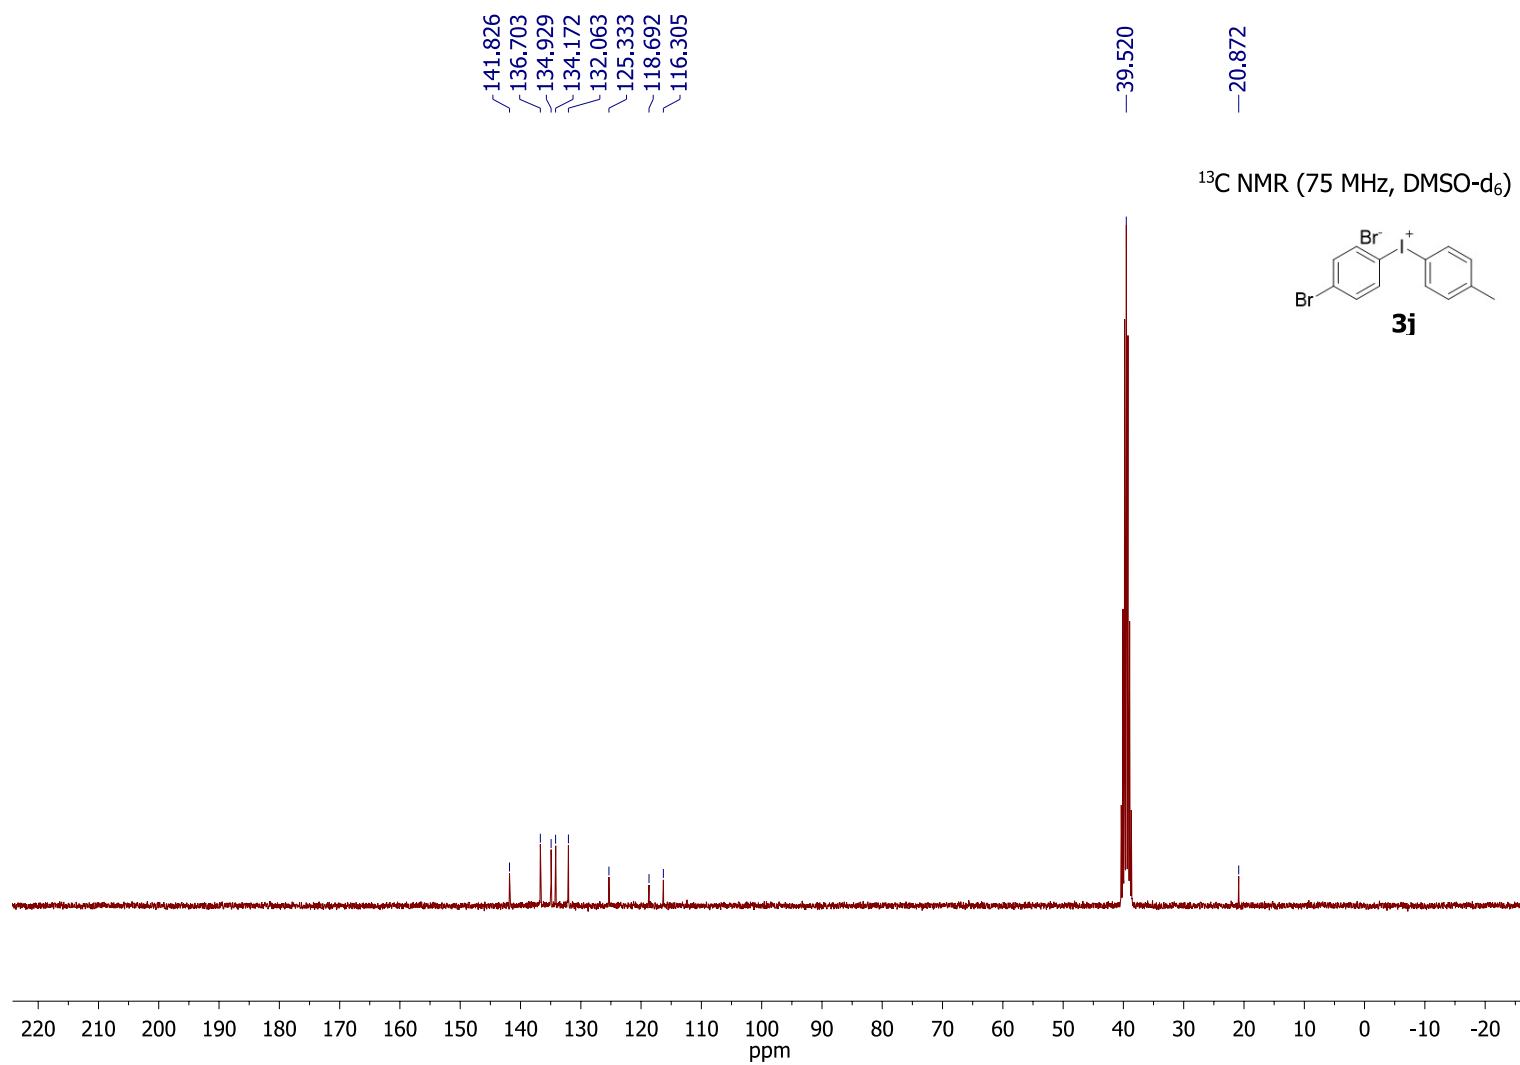

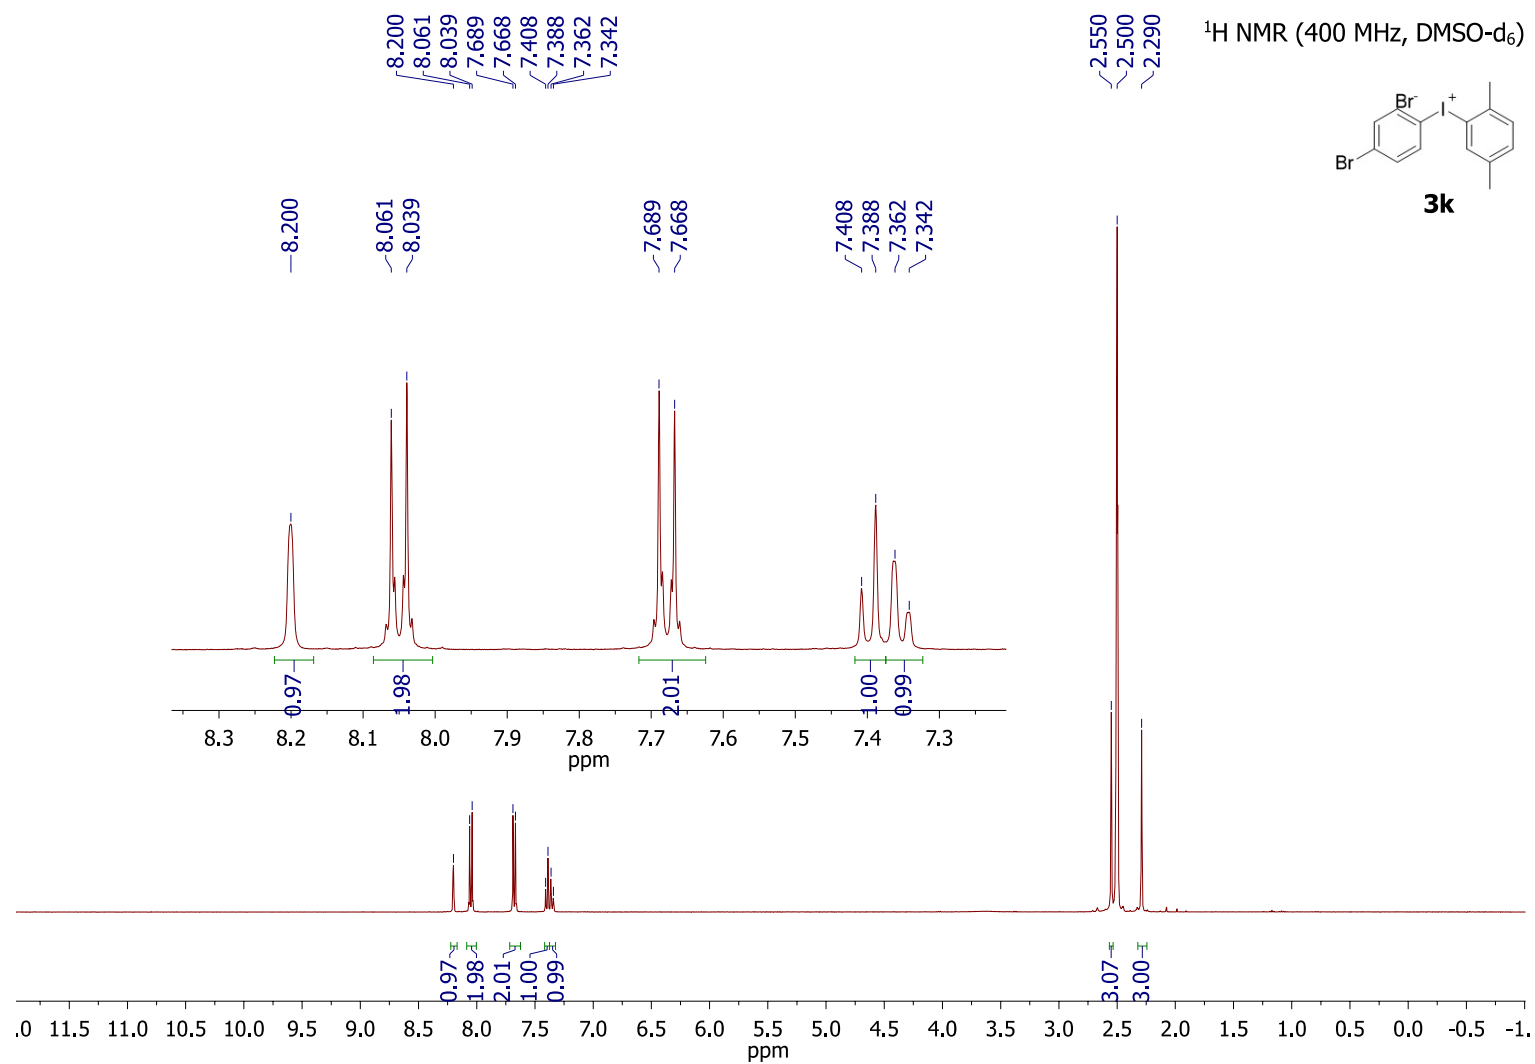

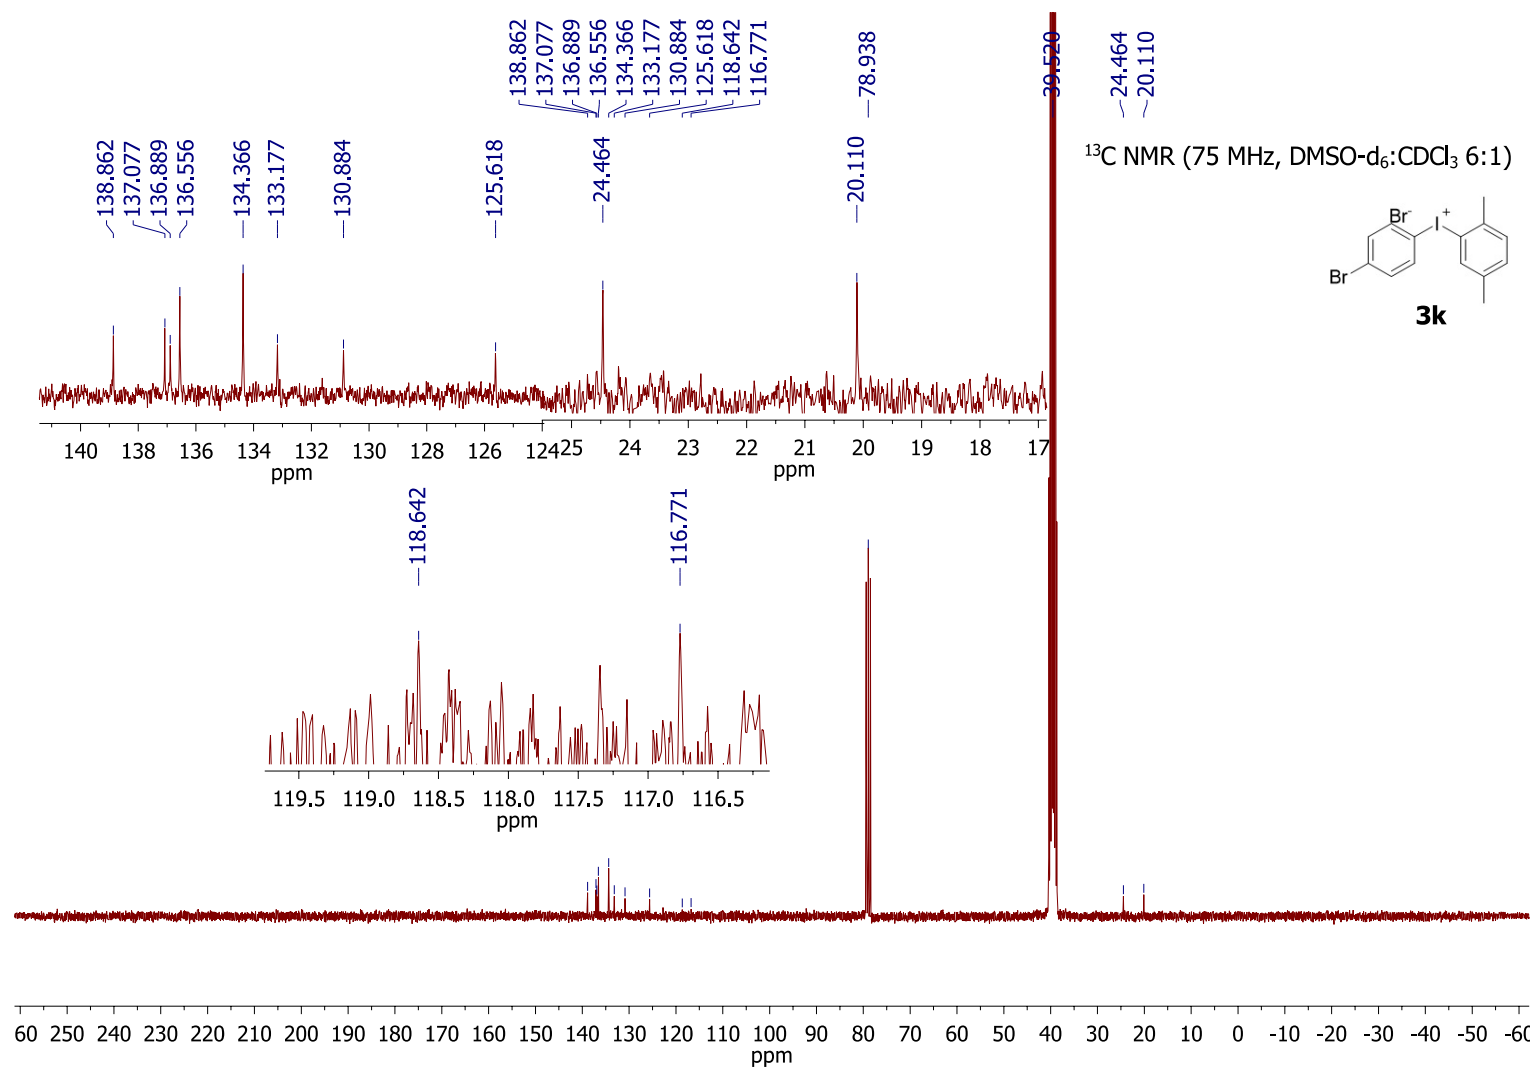

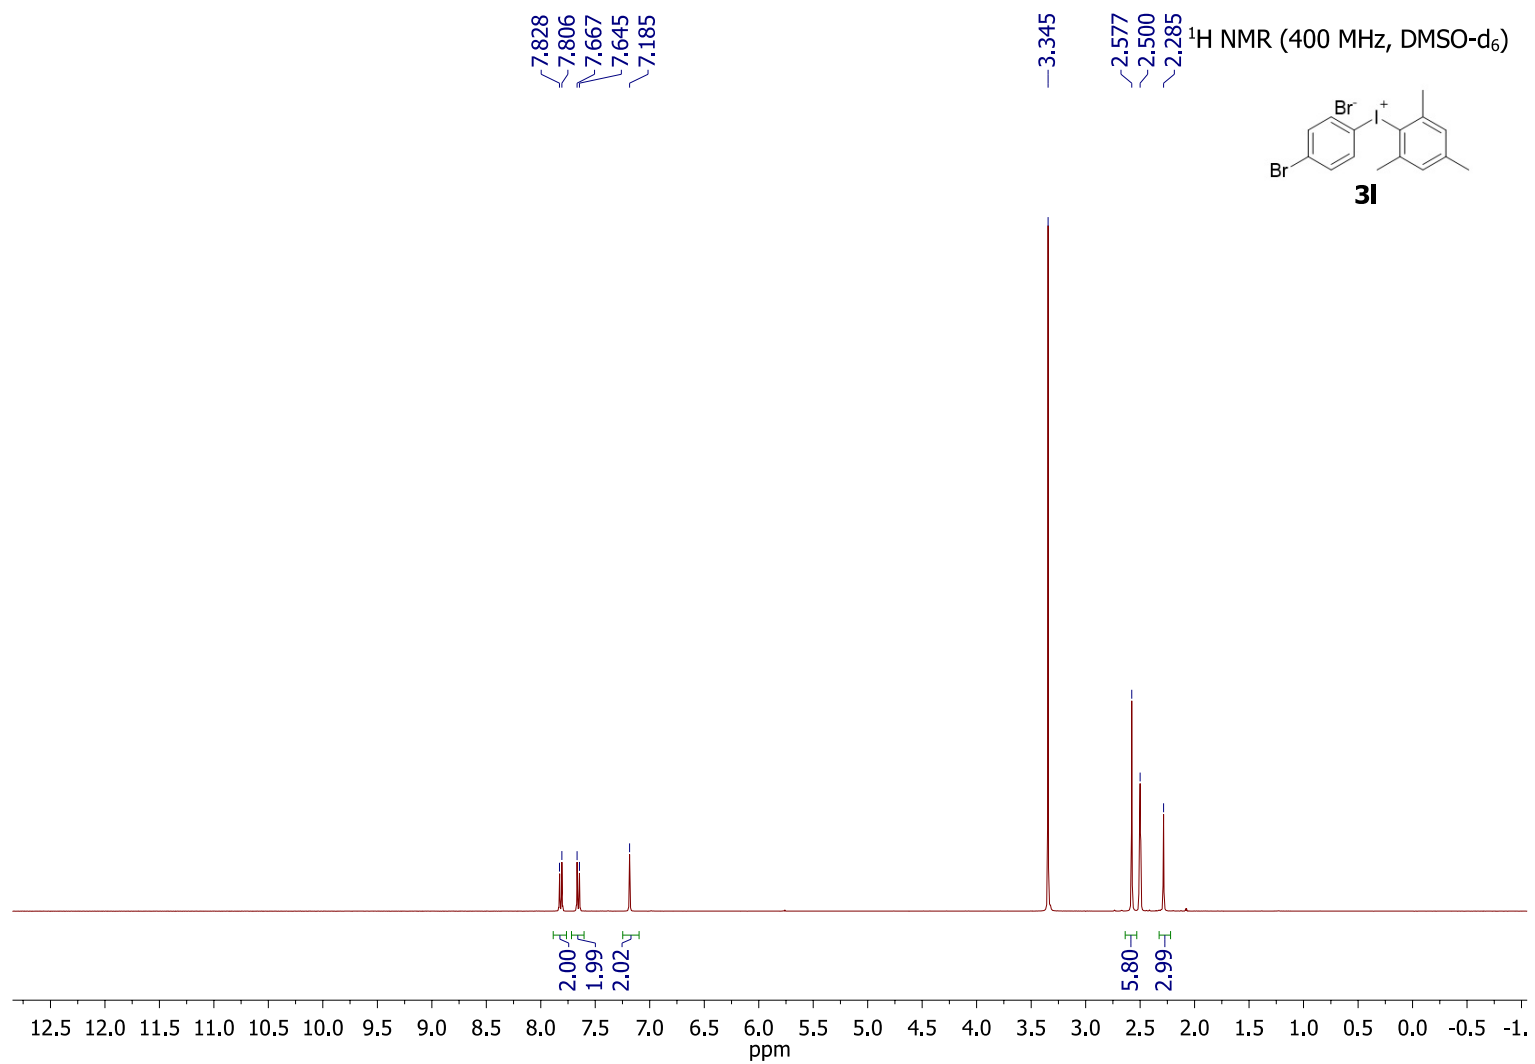

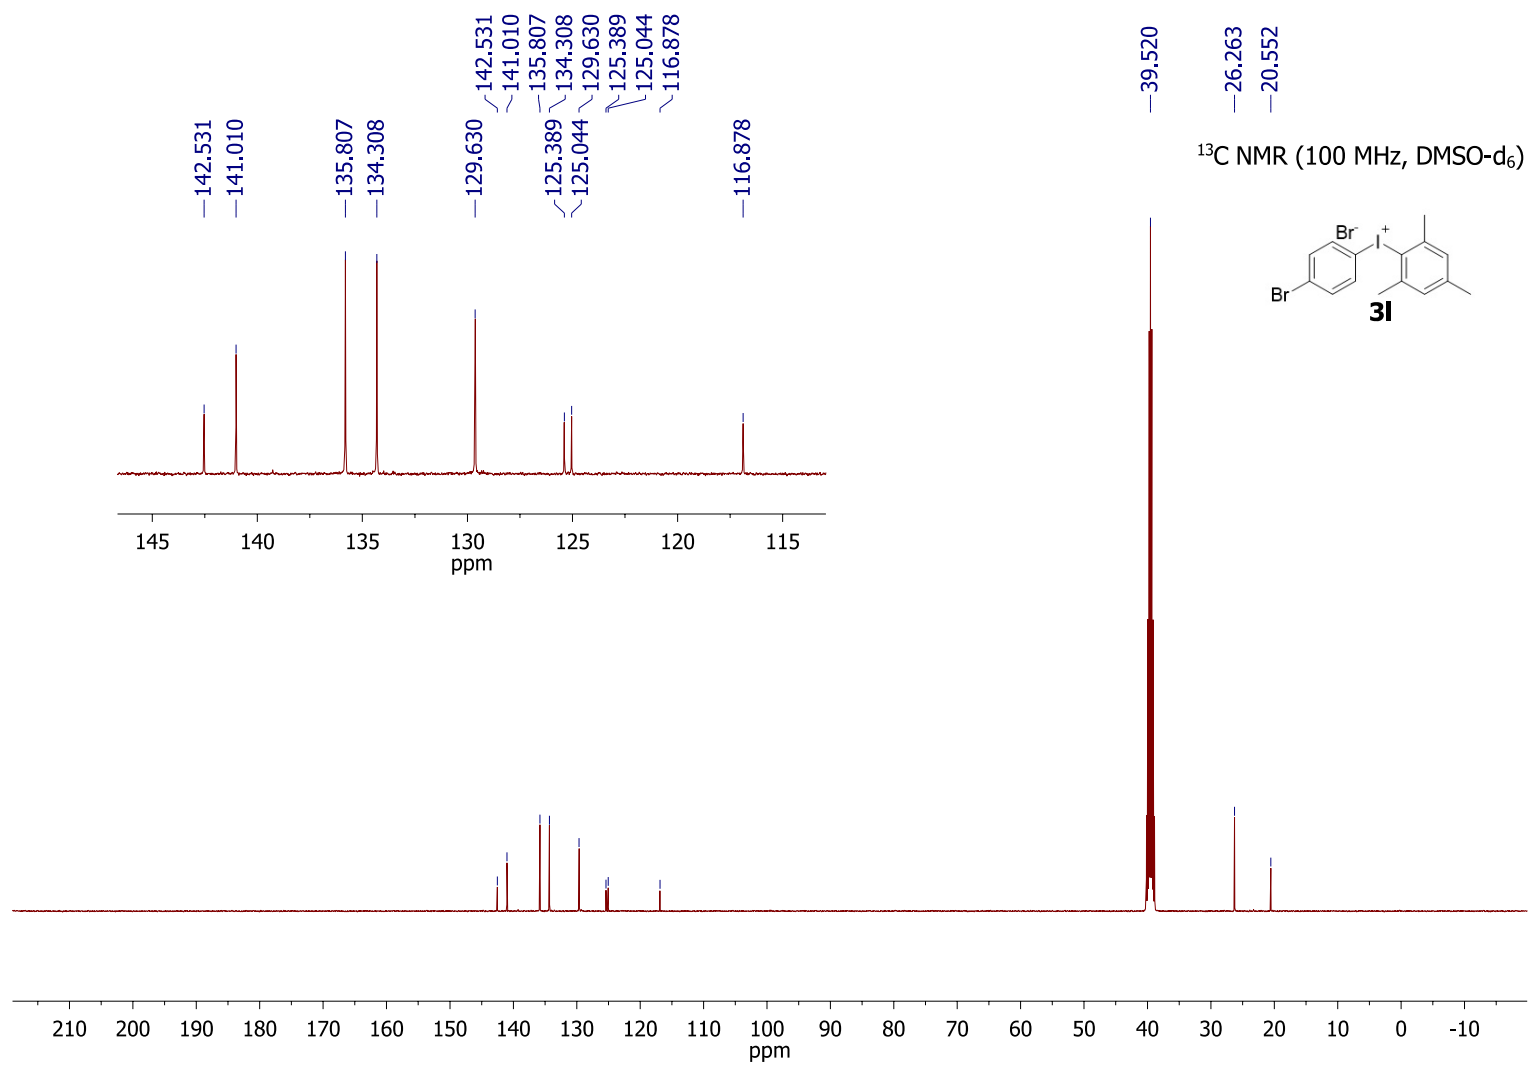

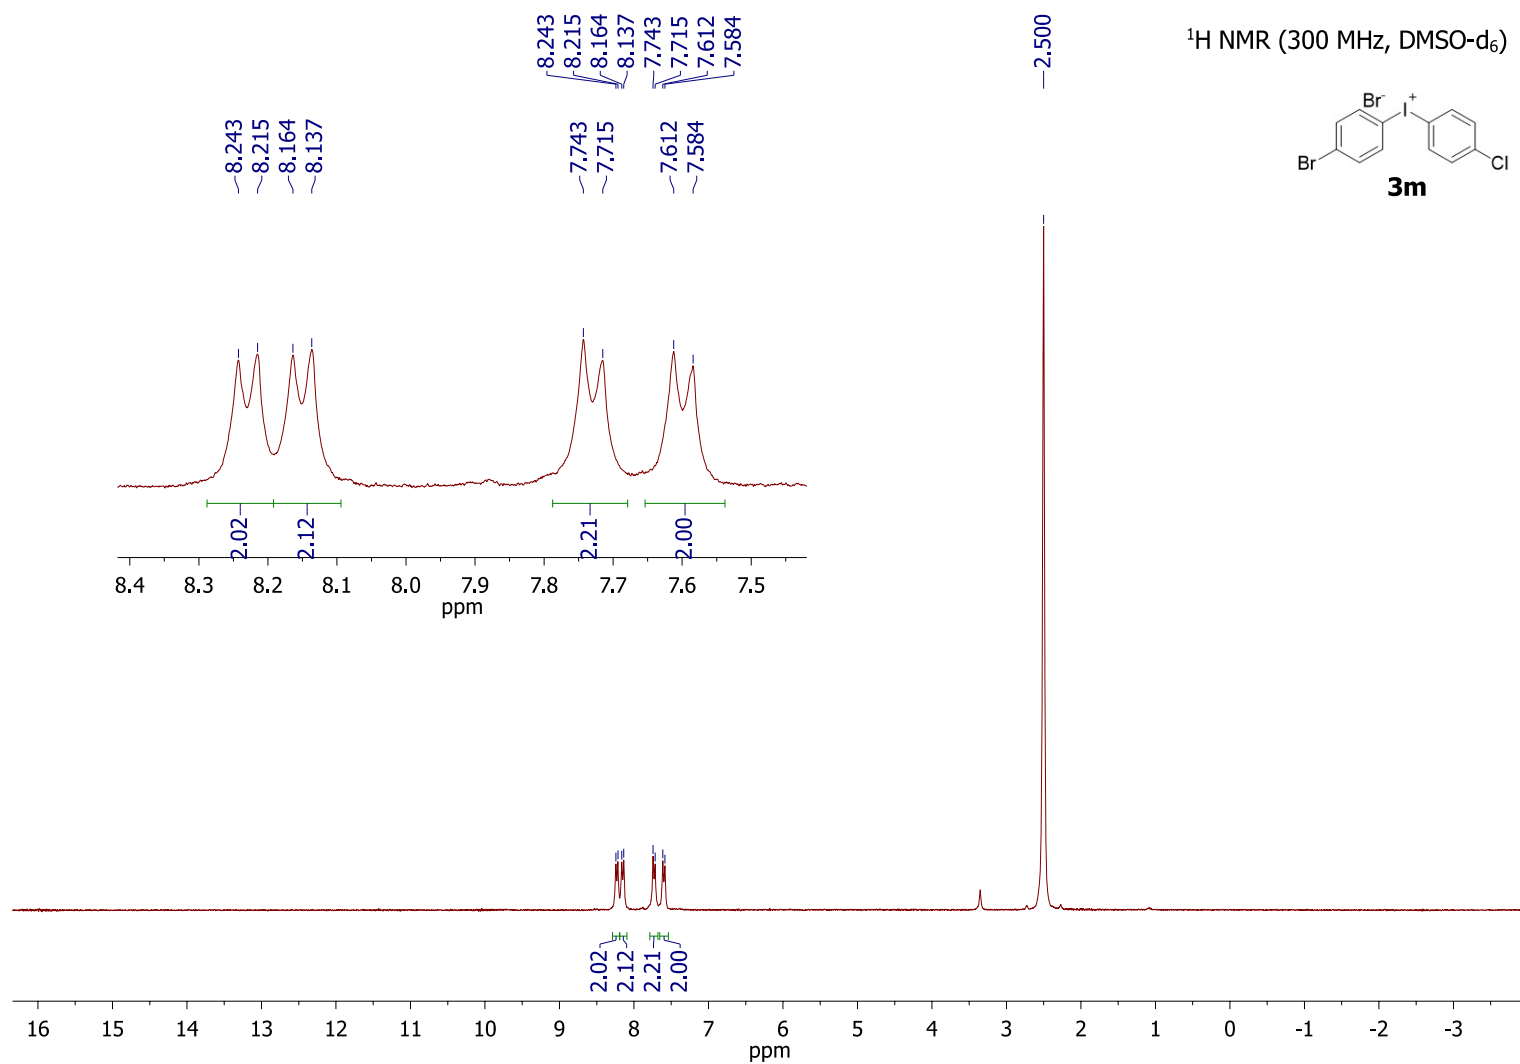

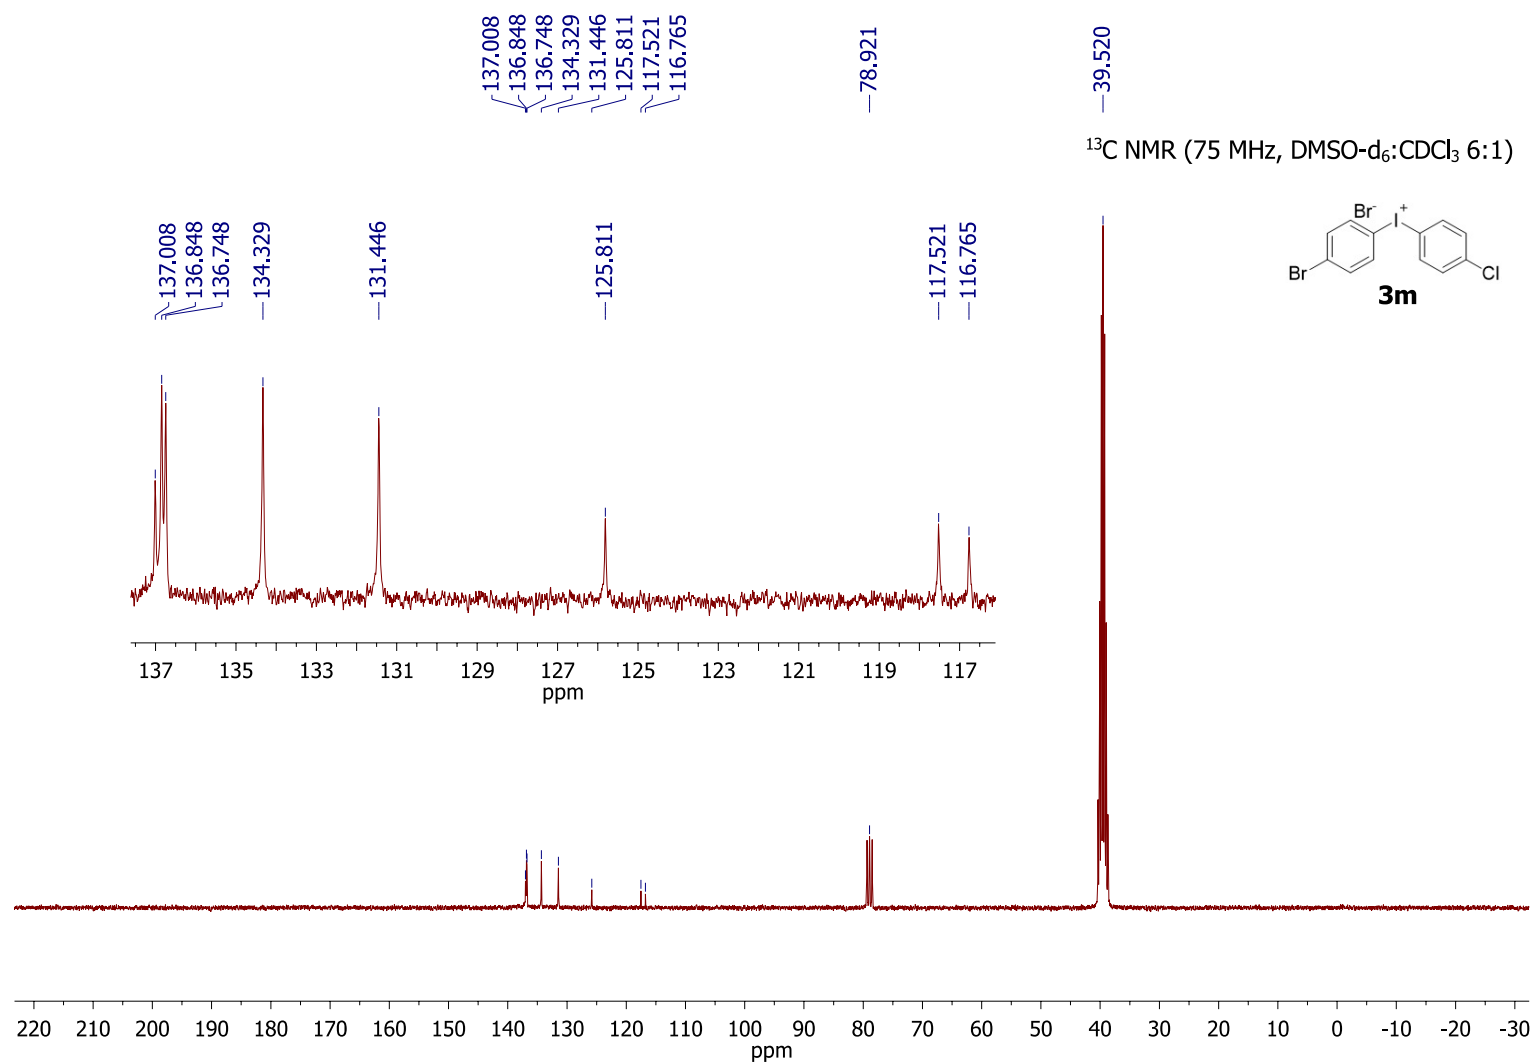

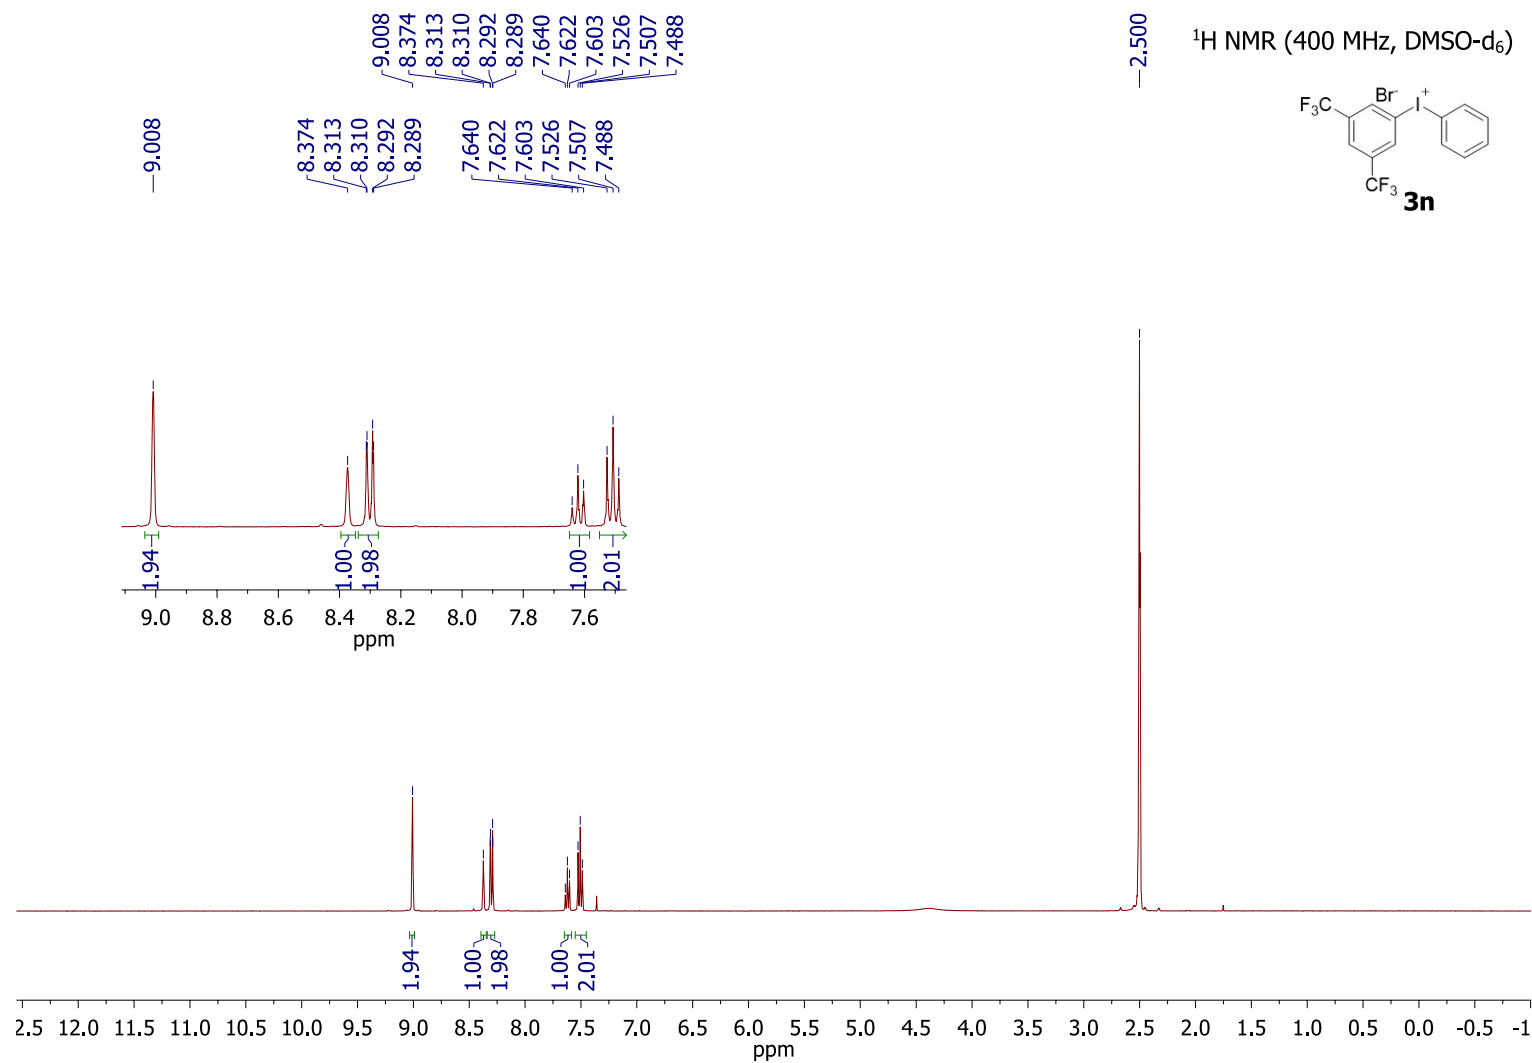

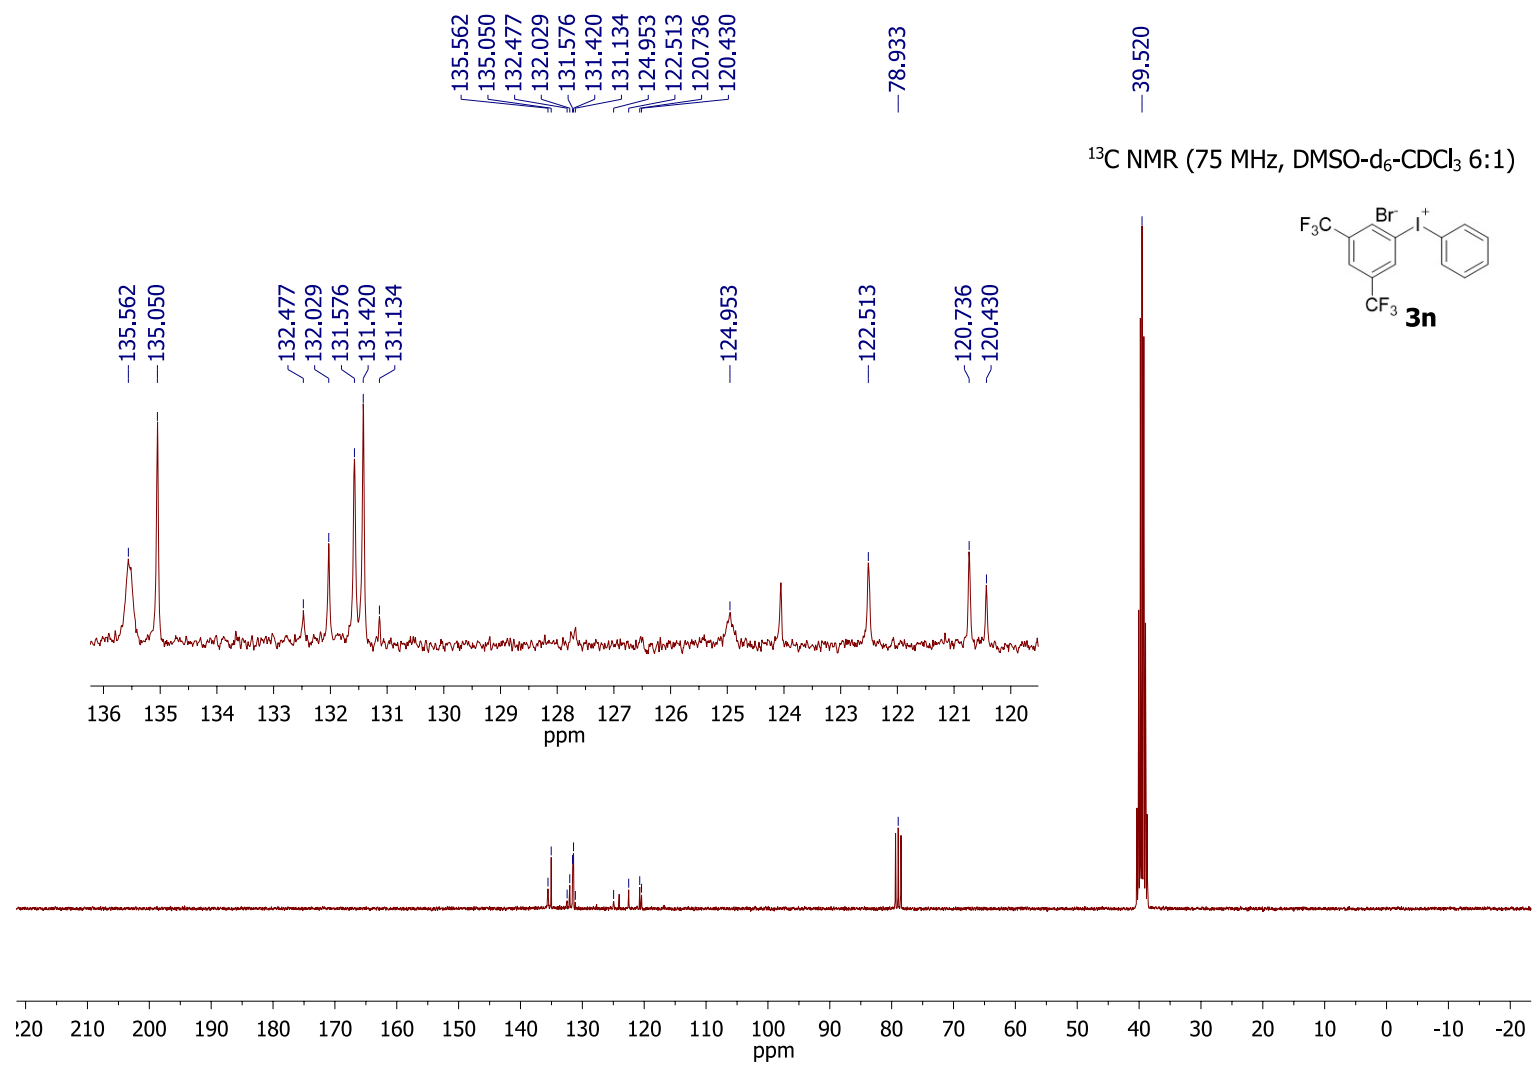

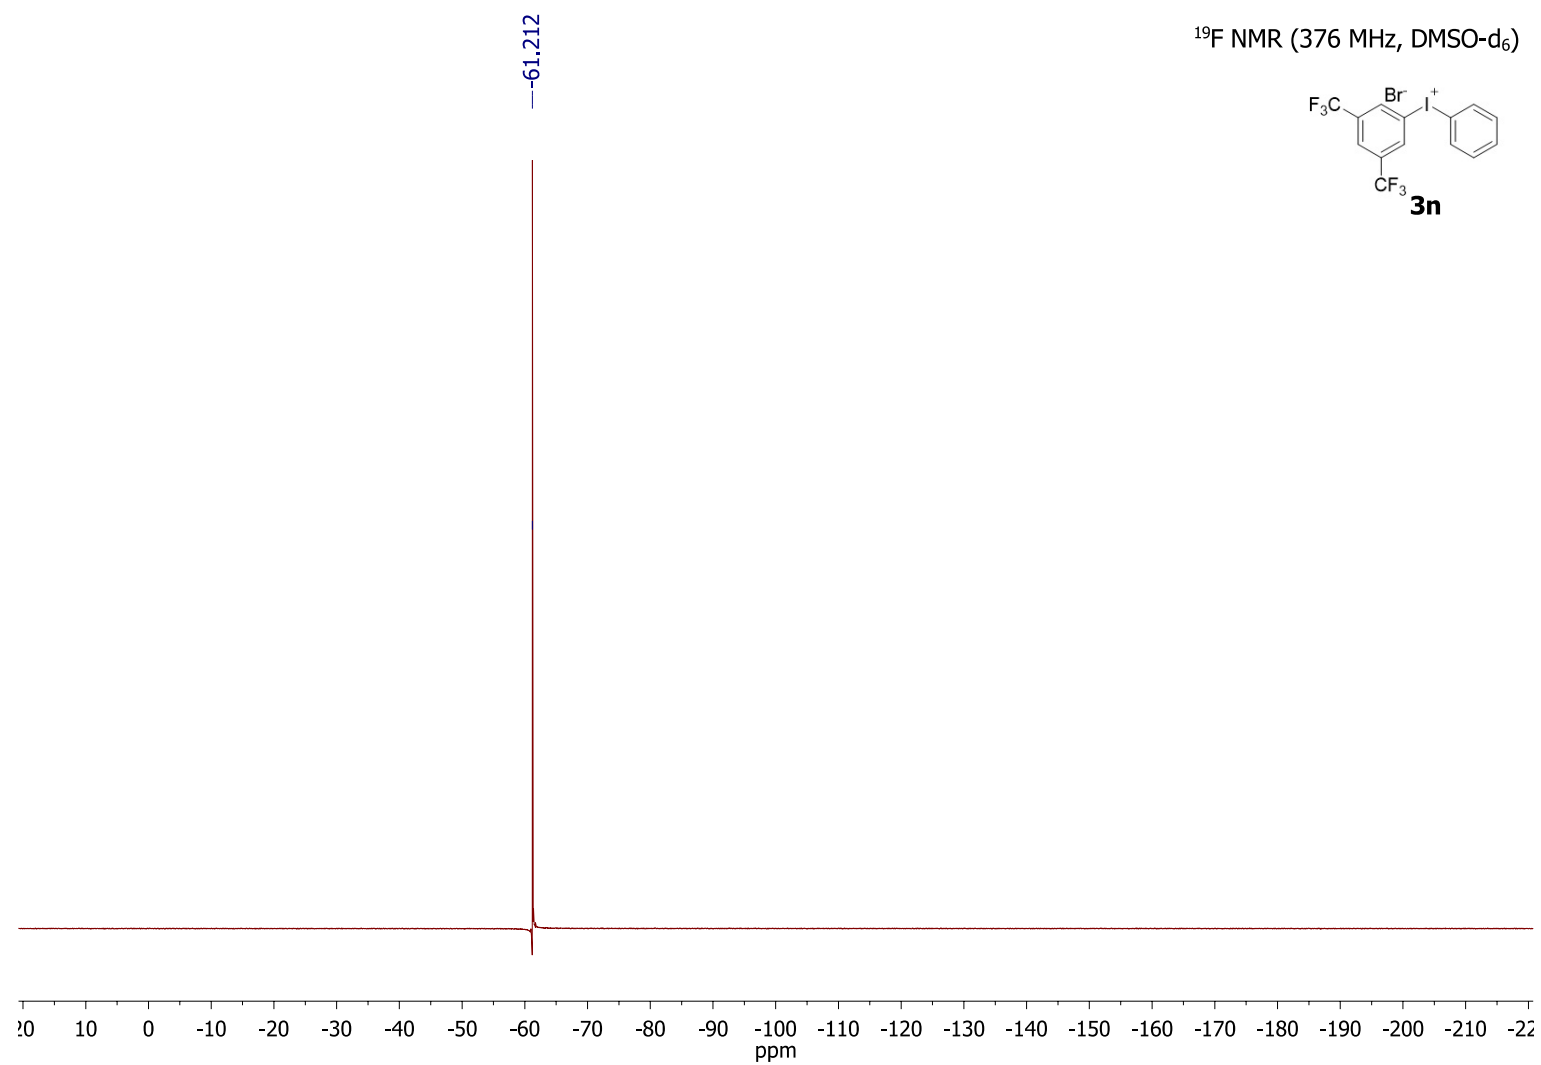

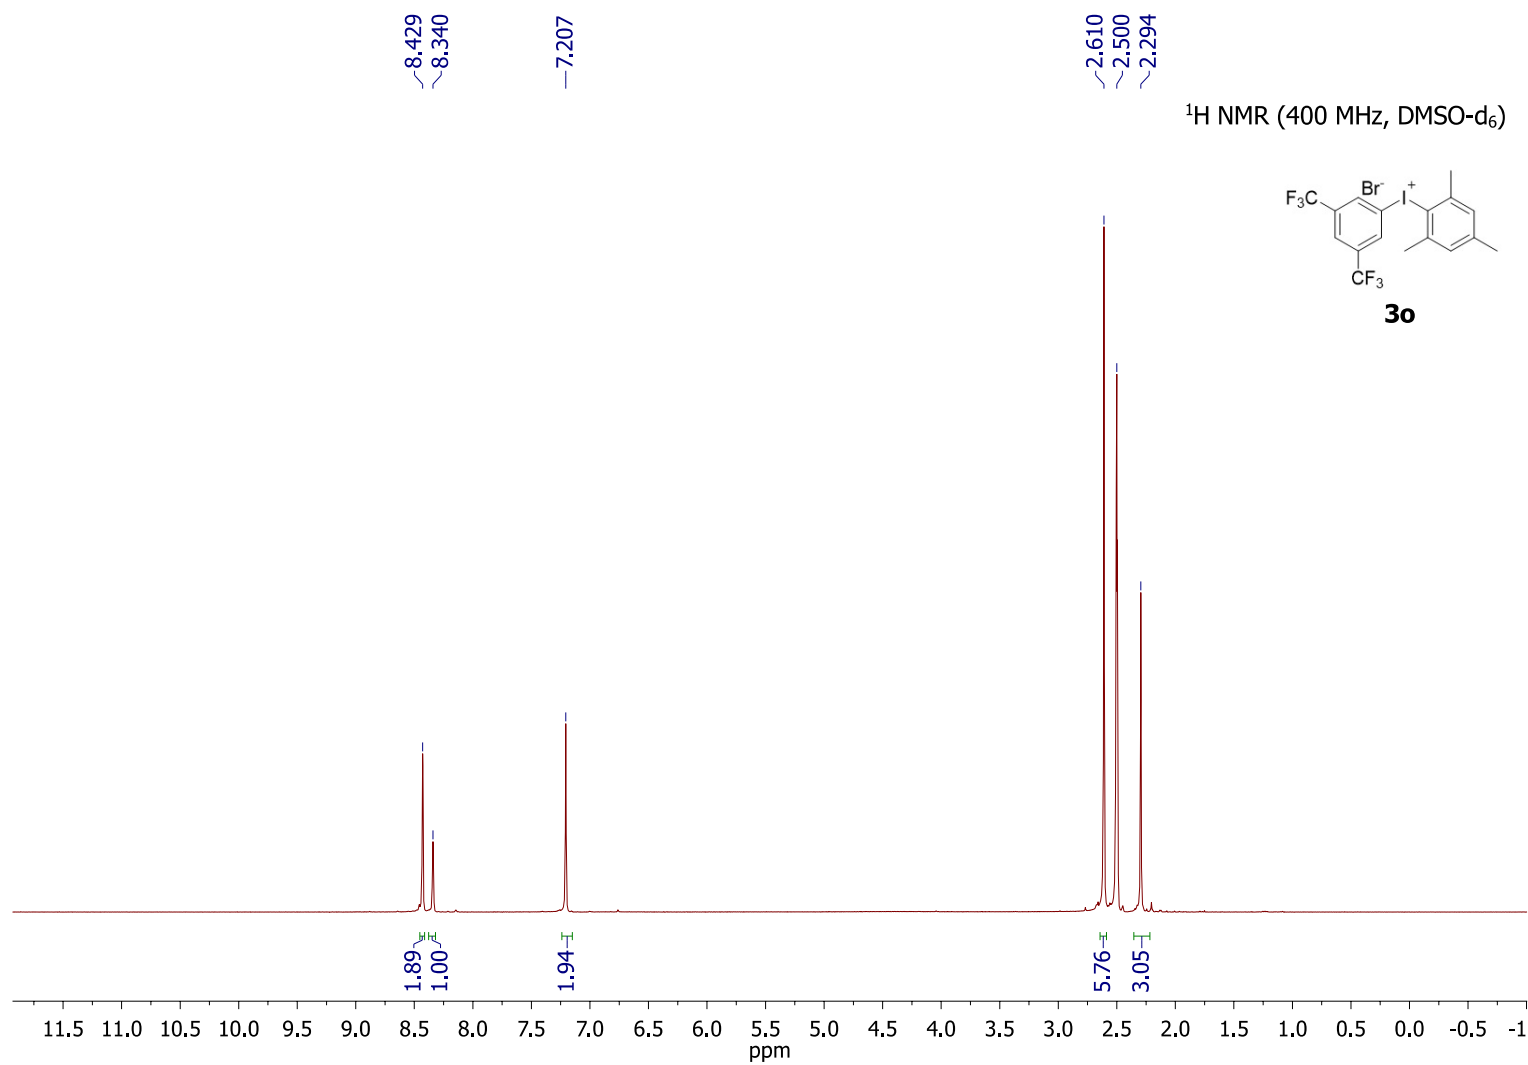

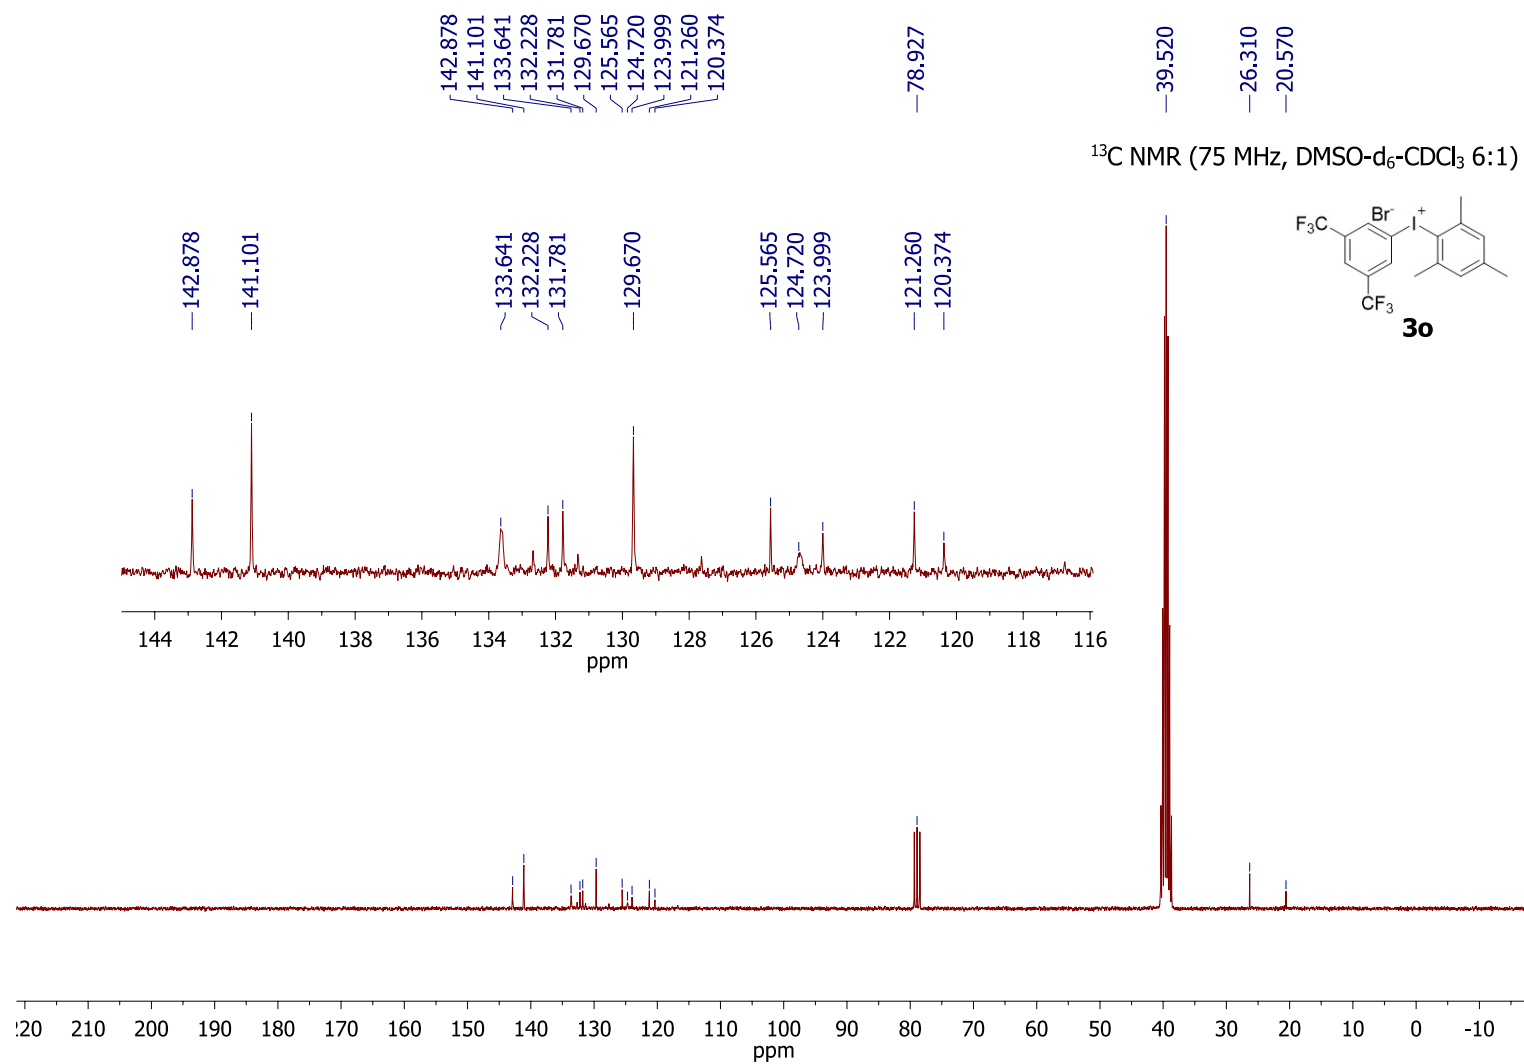

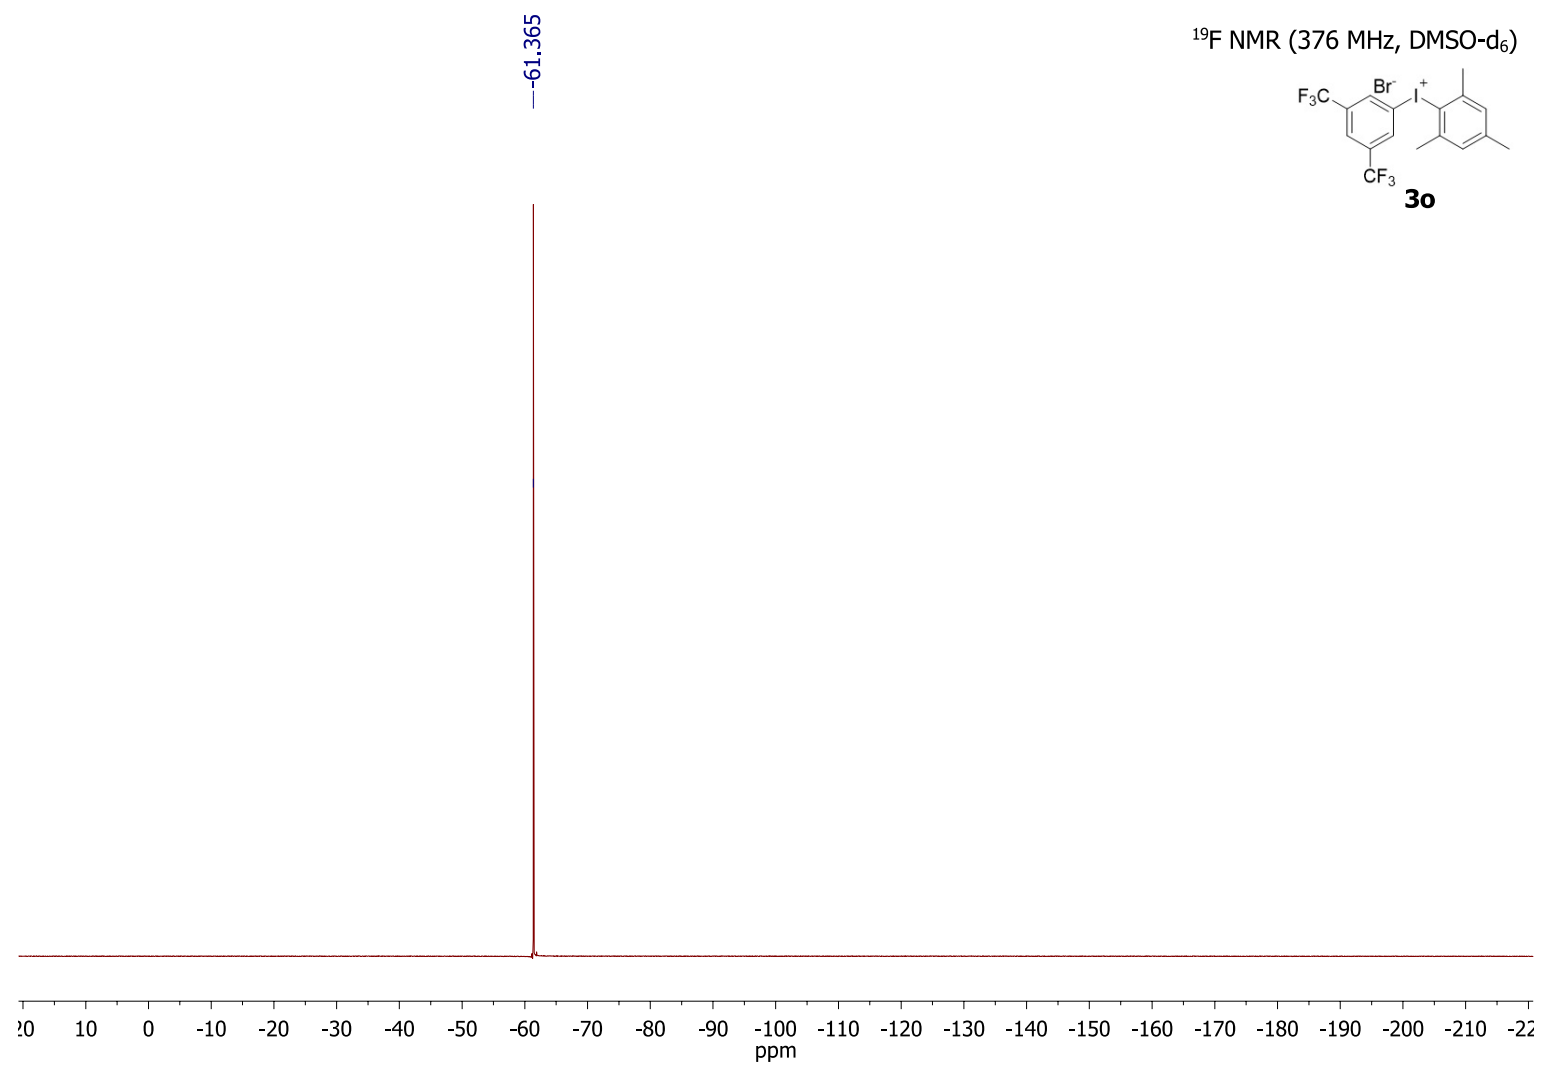

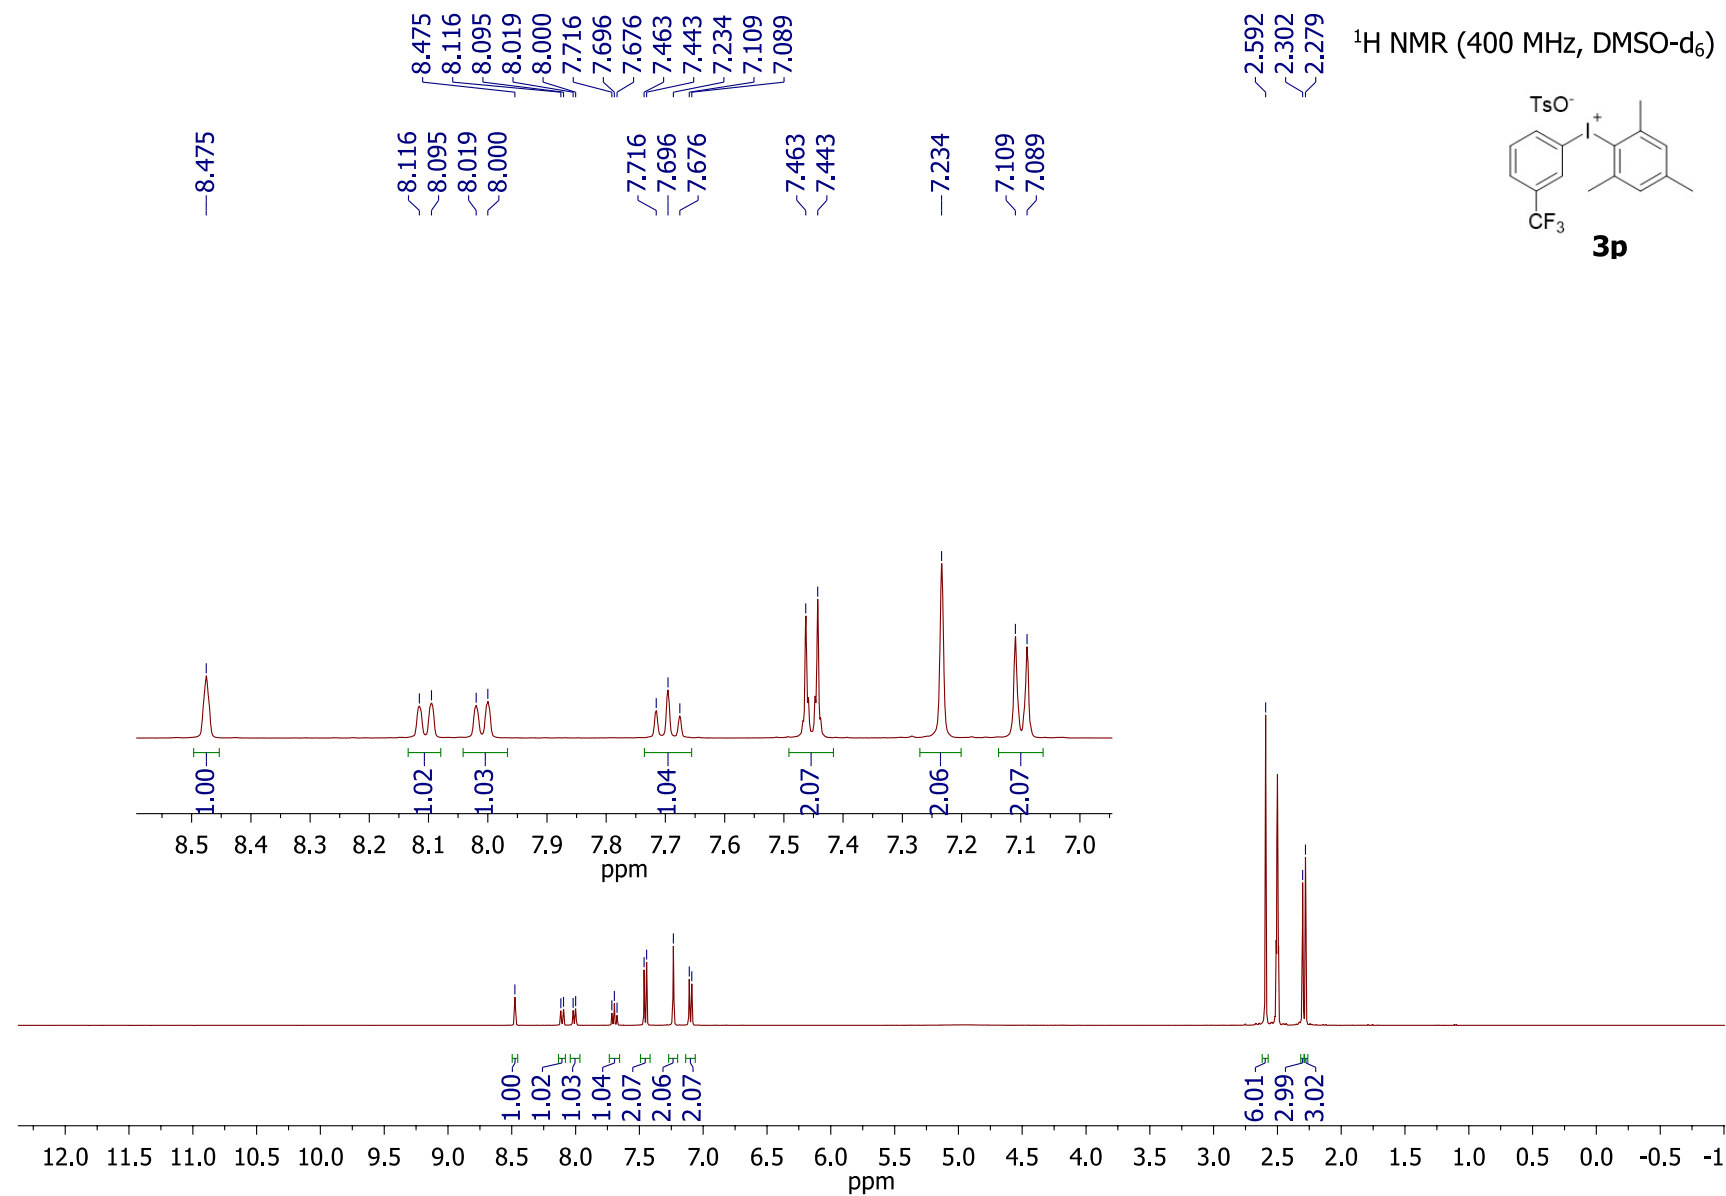

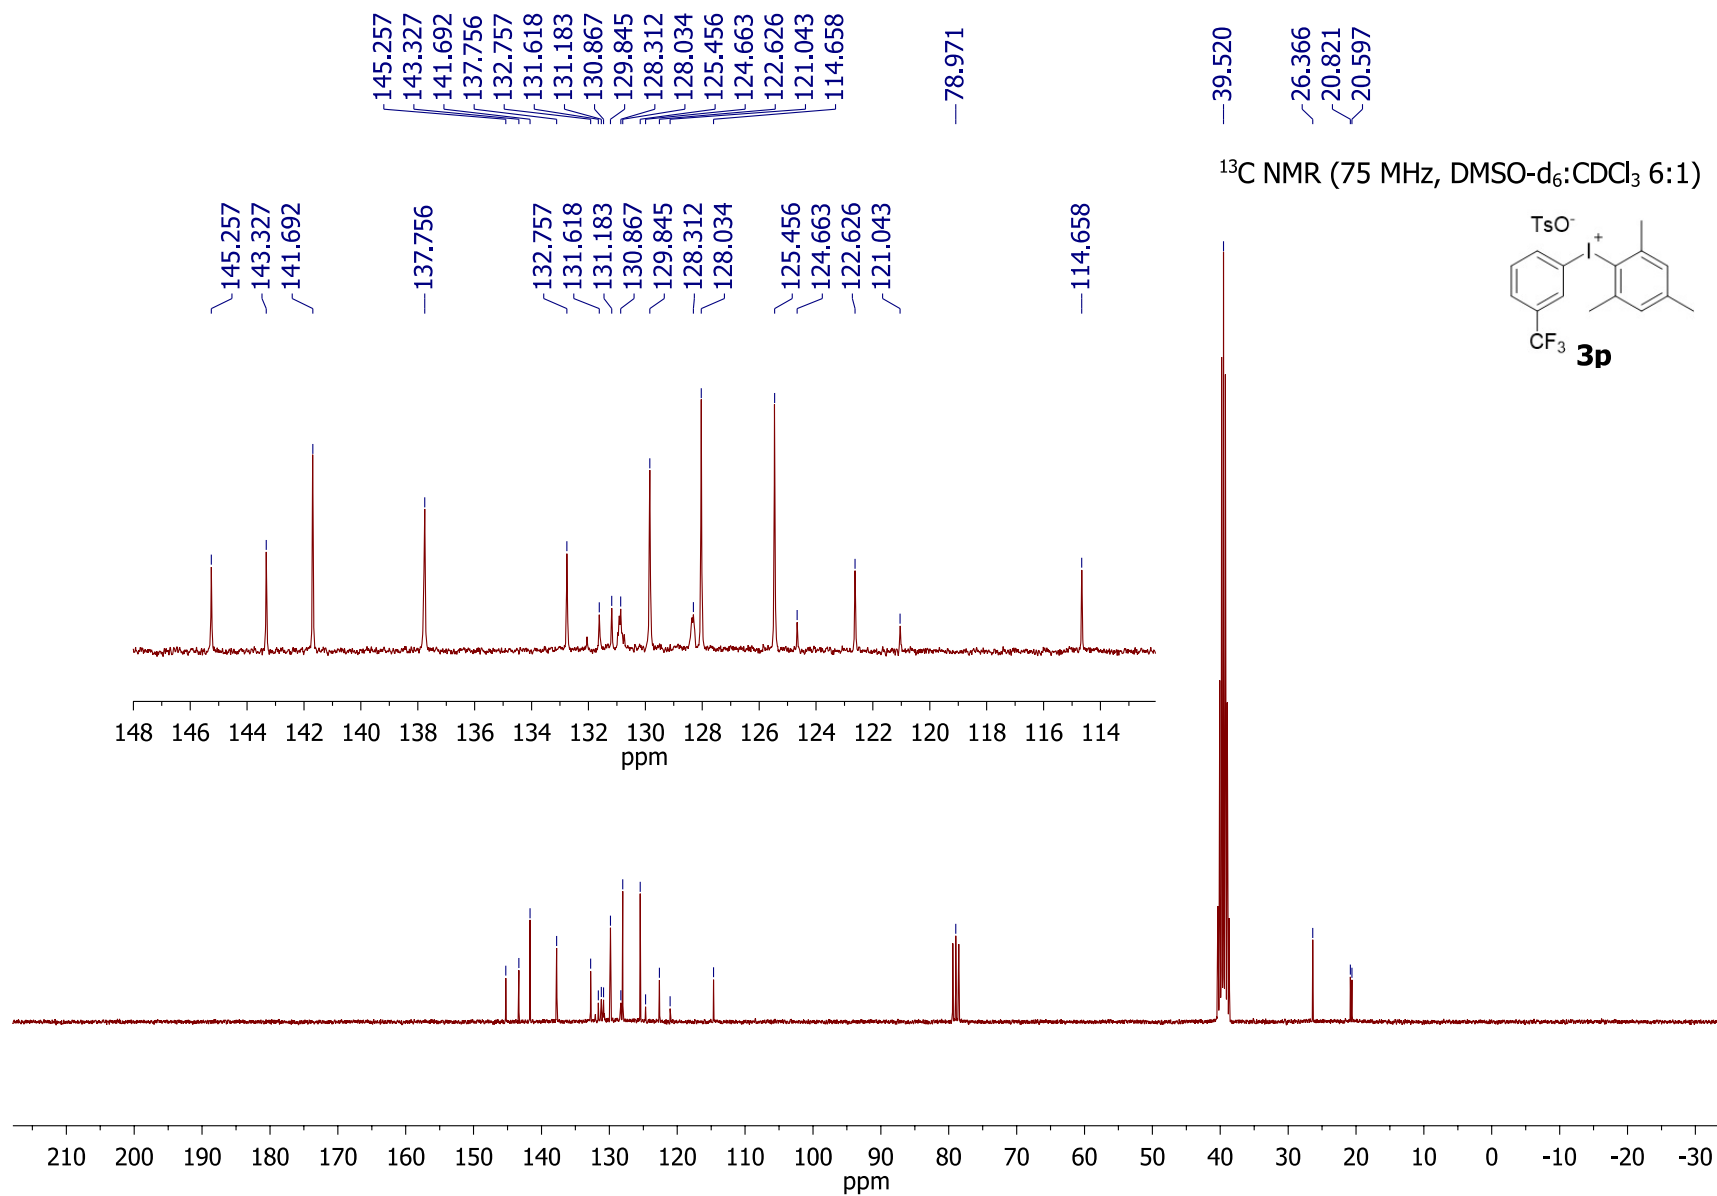

$^{19}\text{F}$  NMR (376 MHz, DMSO- $\text{d}_6$ )

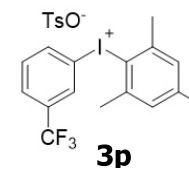

—61.260

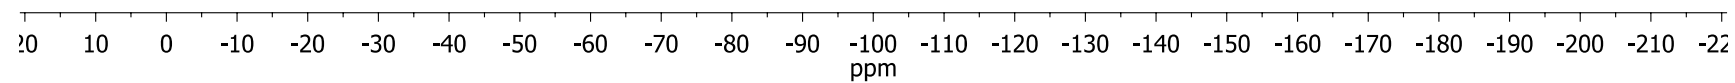

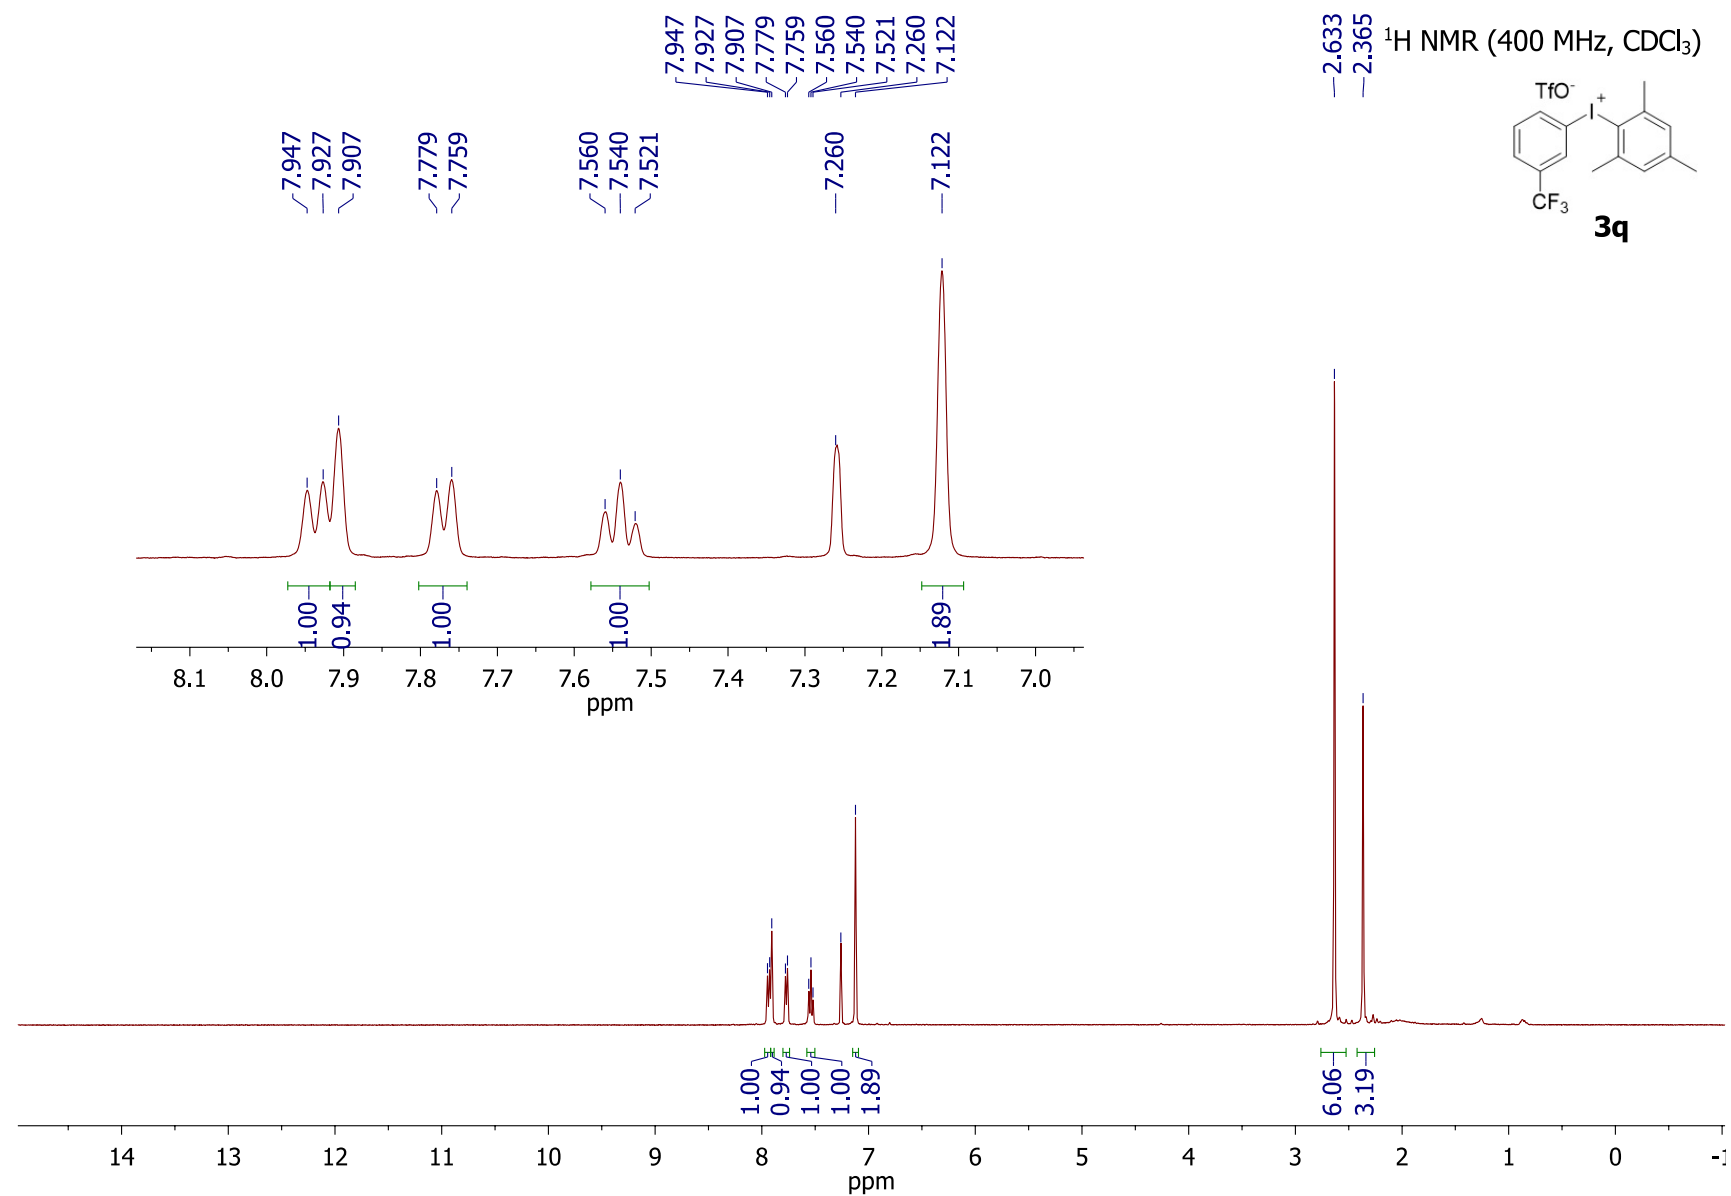

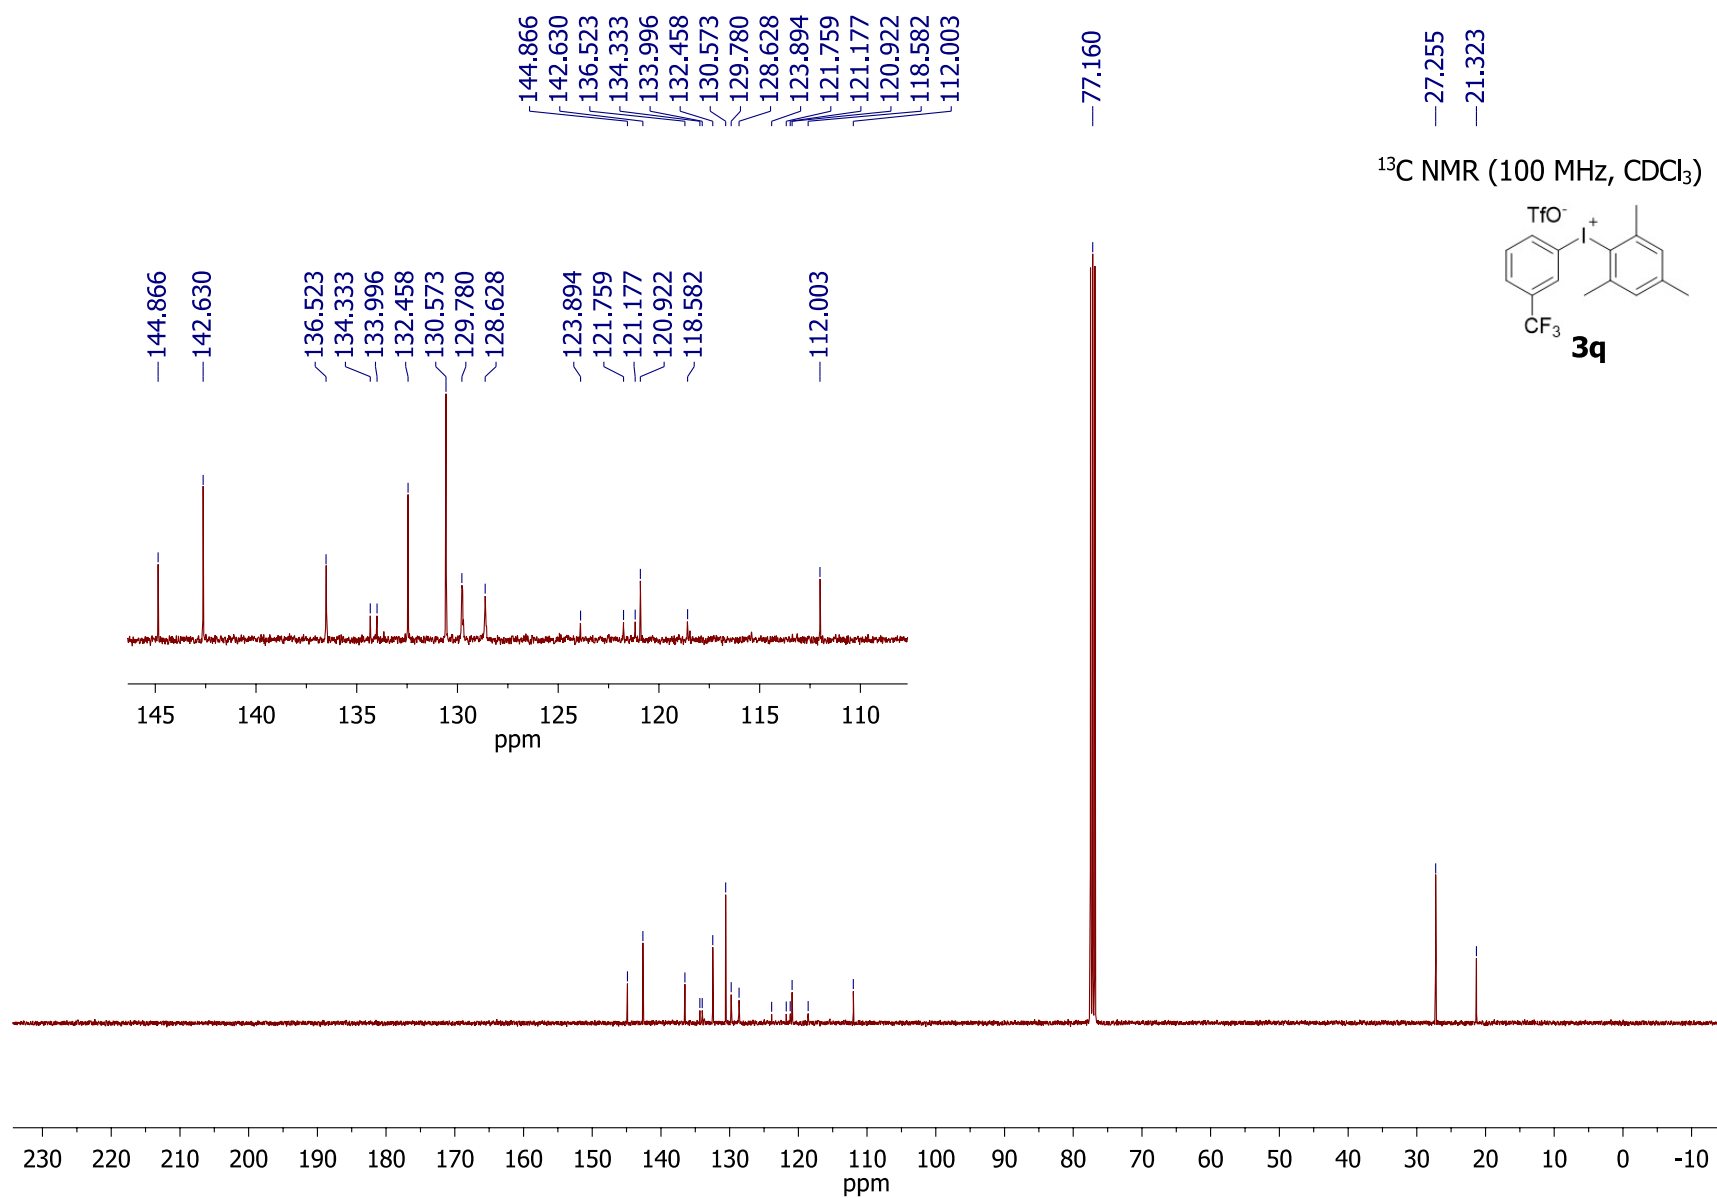

$^{19}\text{F}$  NMR (376 MHz,  $\text{CDCl}_3$ )

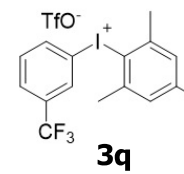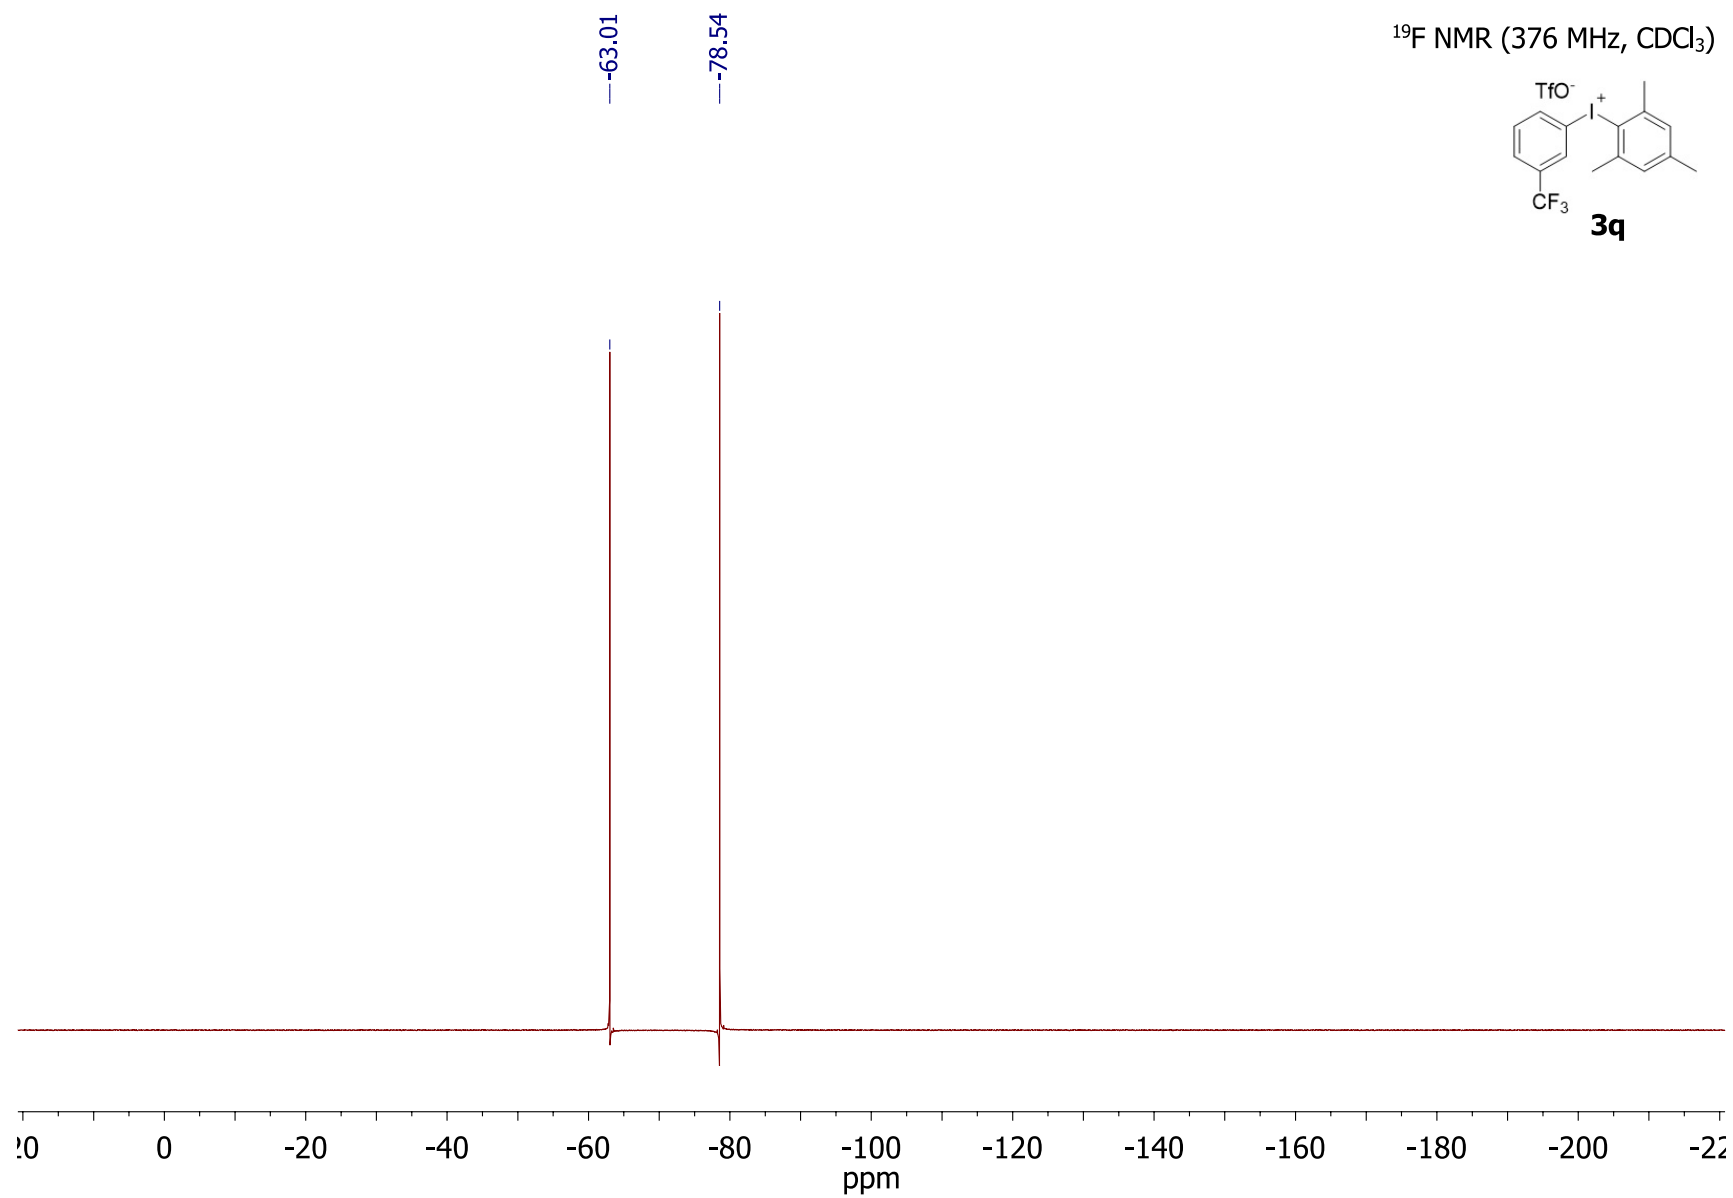

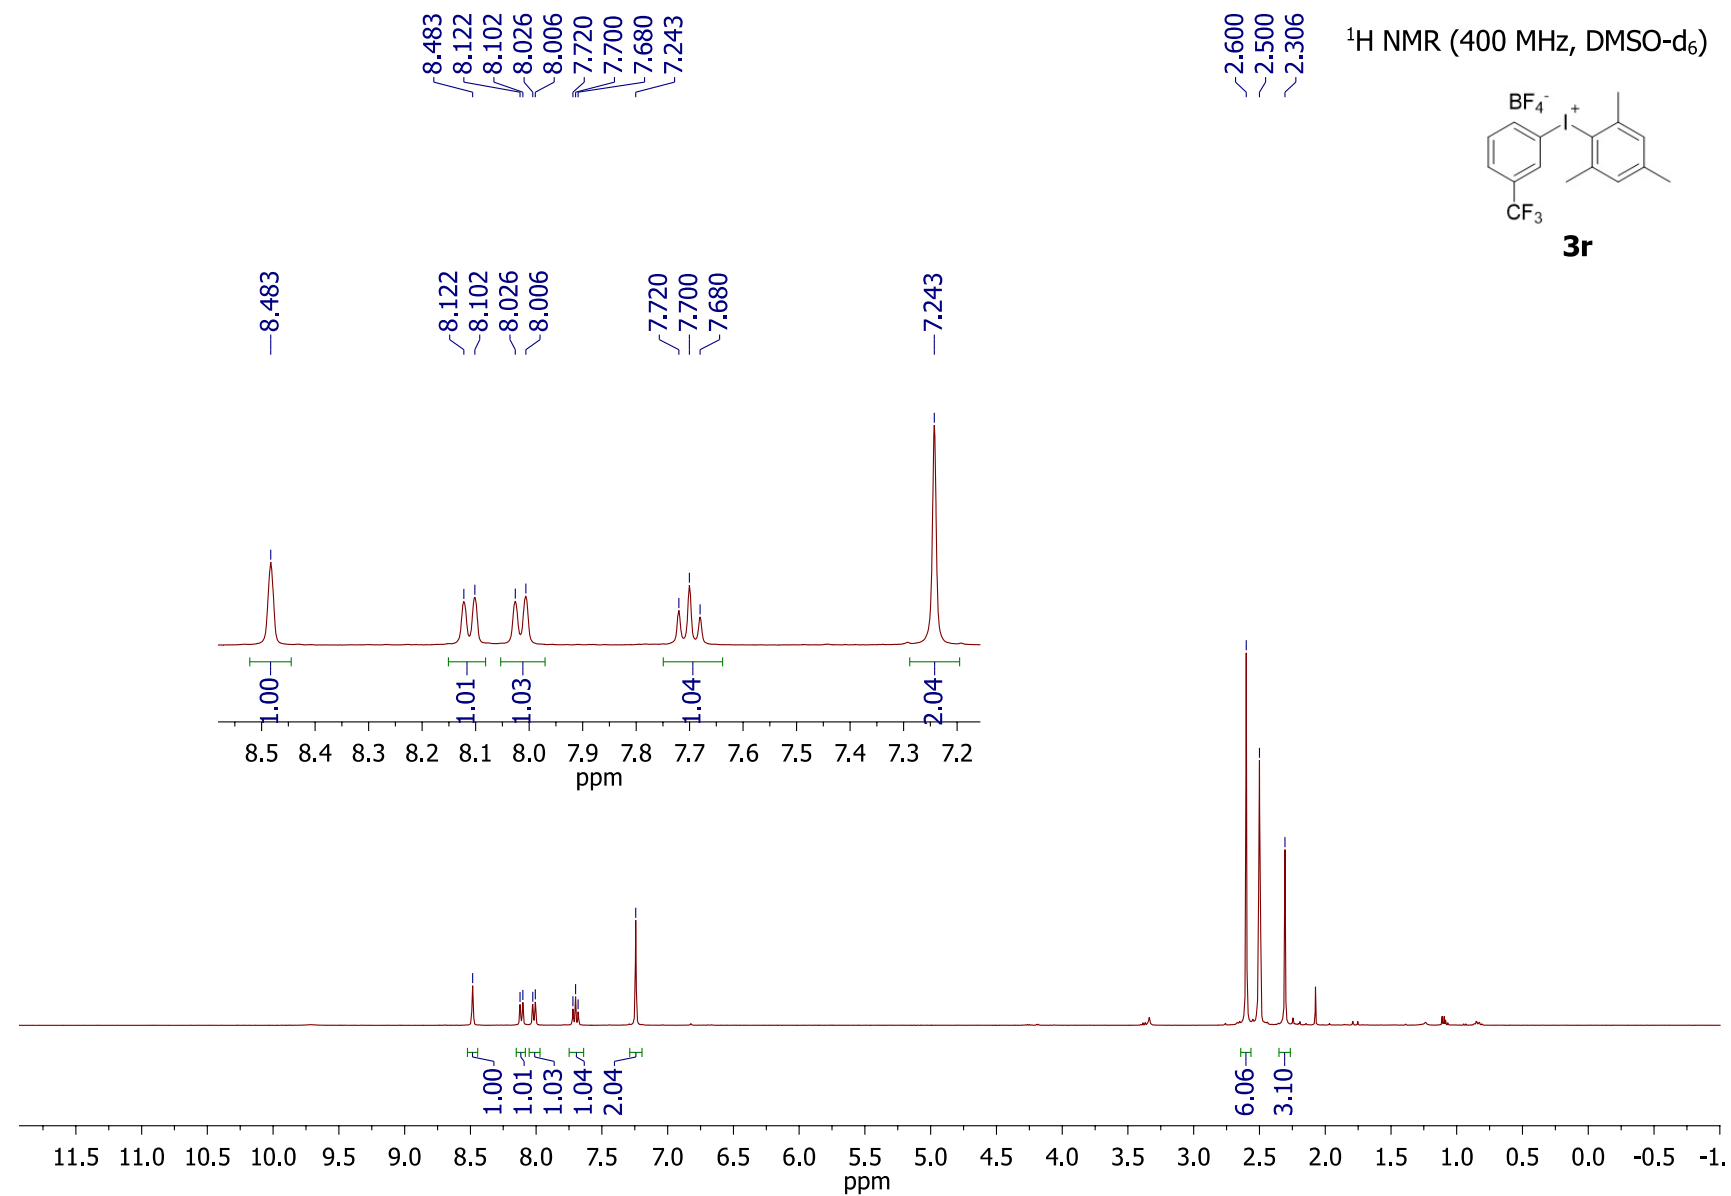

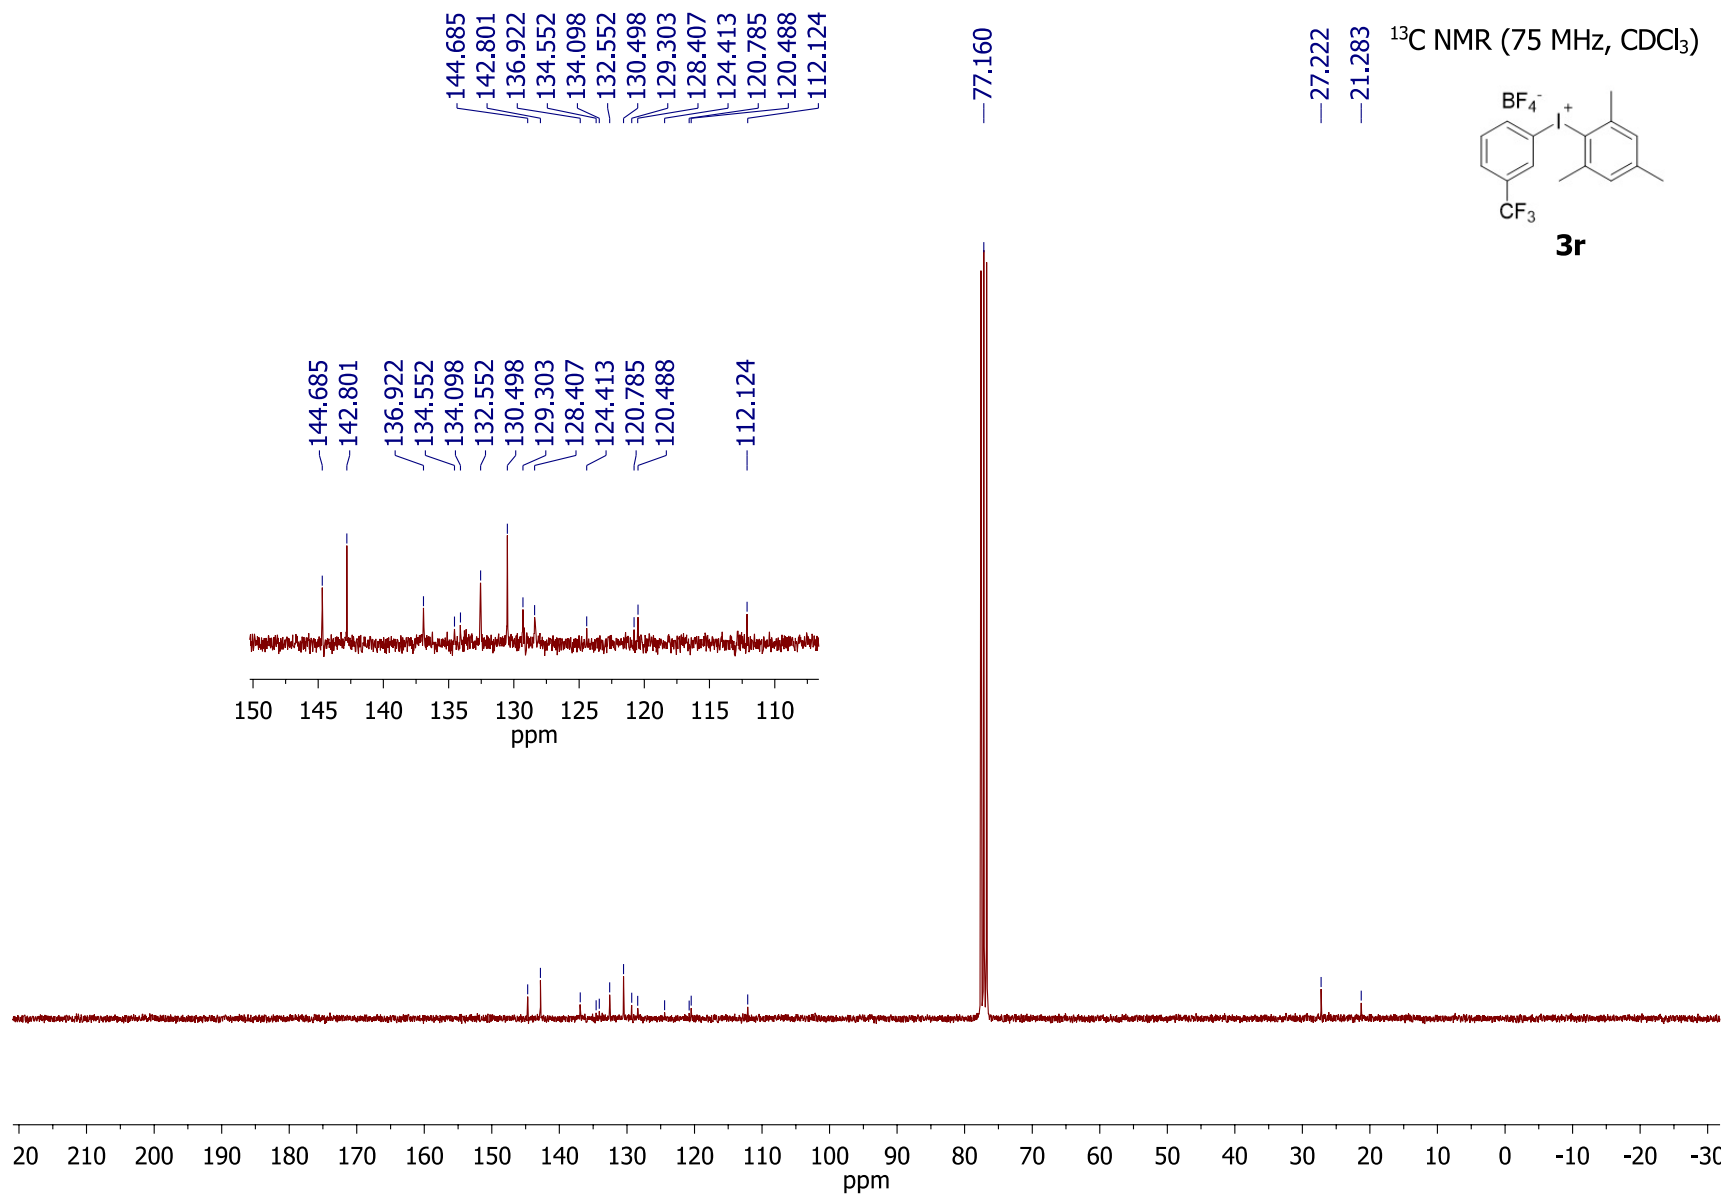

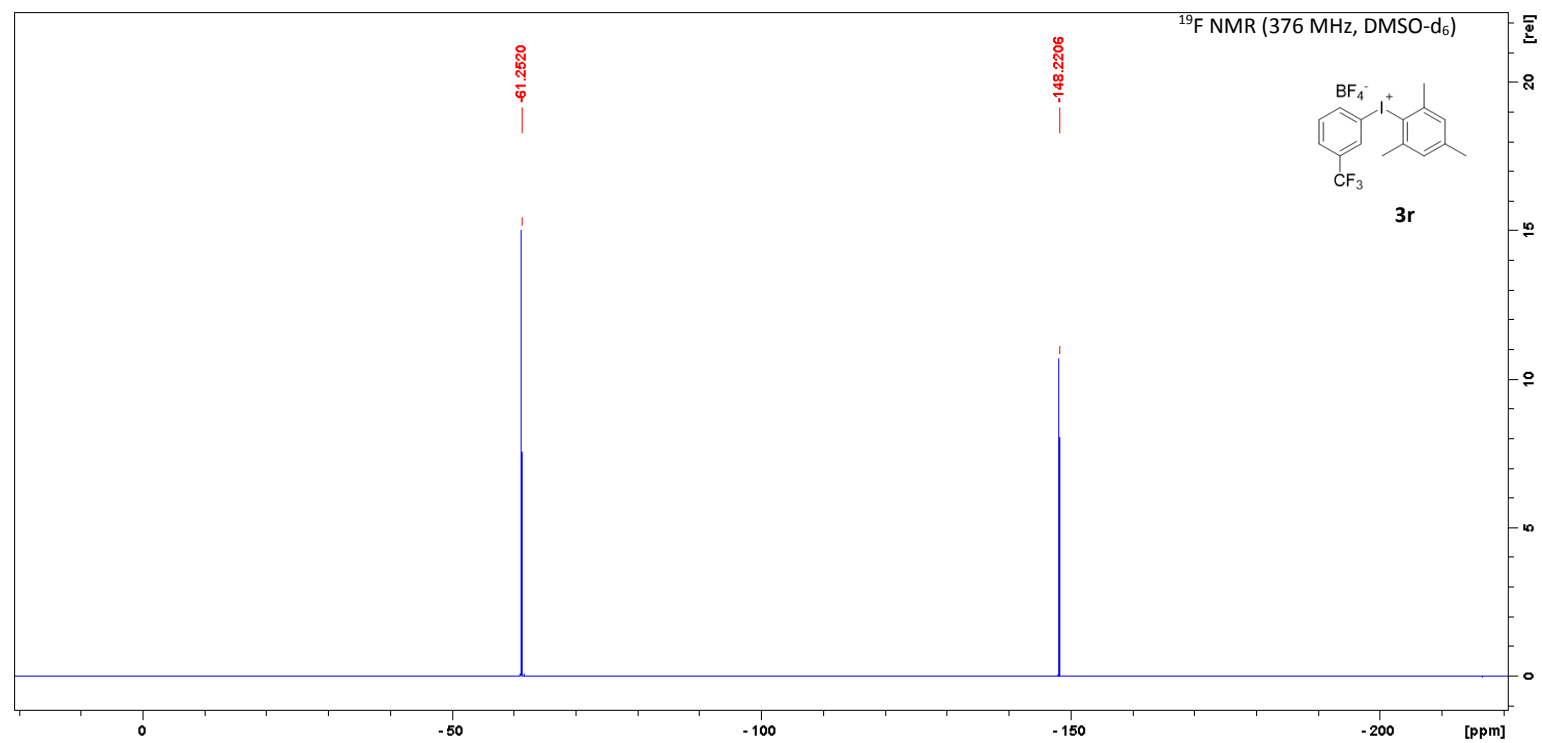

<sup>13</sup>C NMR (75 MHz, DMSO-d<sub>6</sub>:CDCl<sub>3</sub> 6:1)

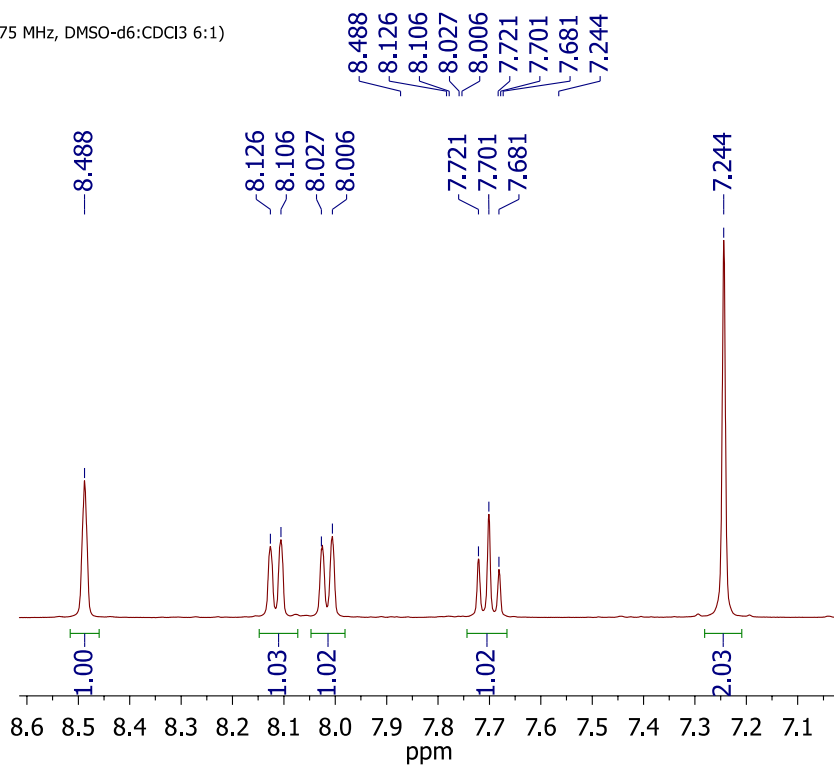

<sup>1</sup>H NMR (400 MHz, DMSO-d<sub>6</sub>)

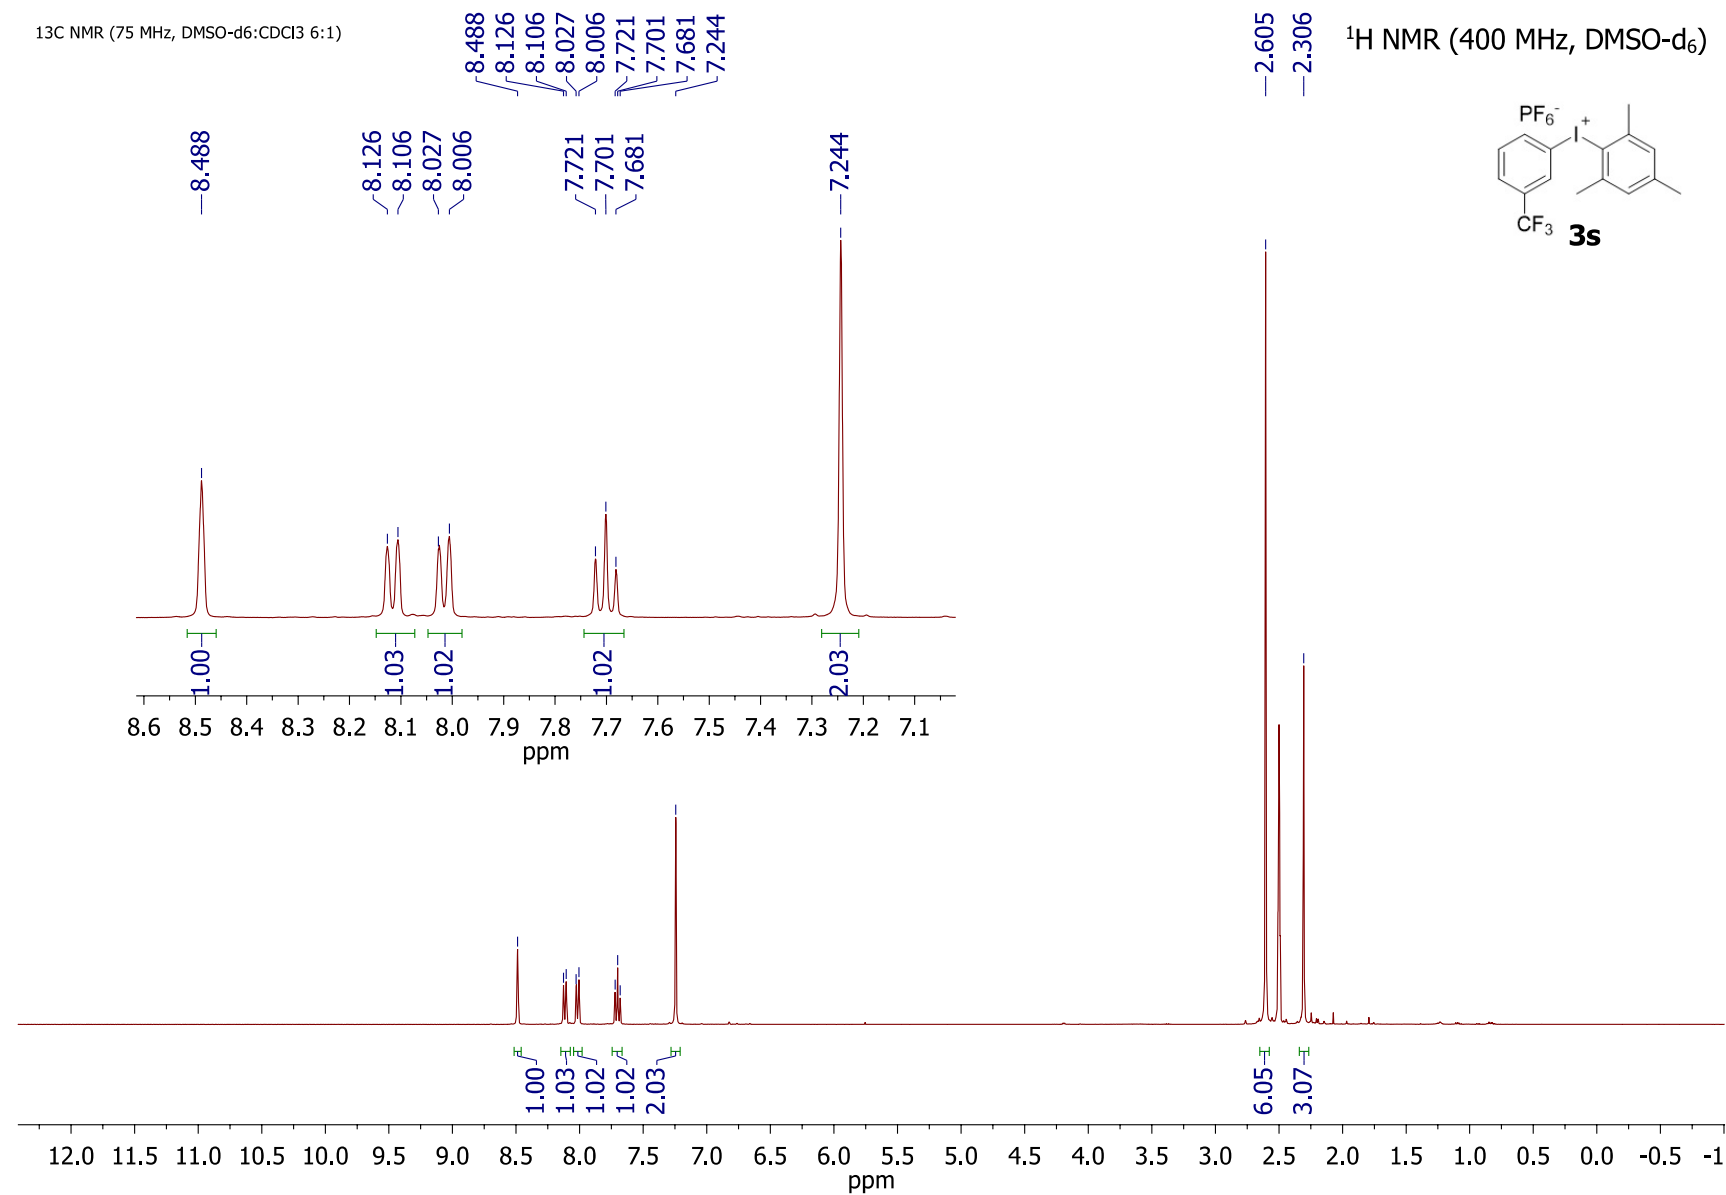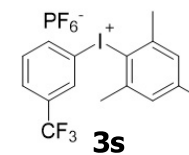

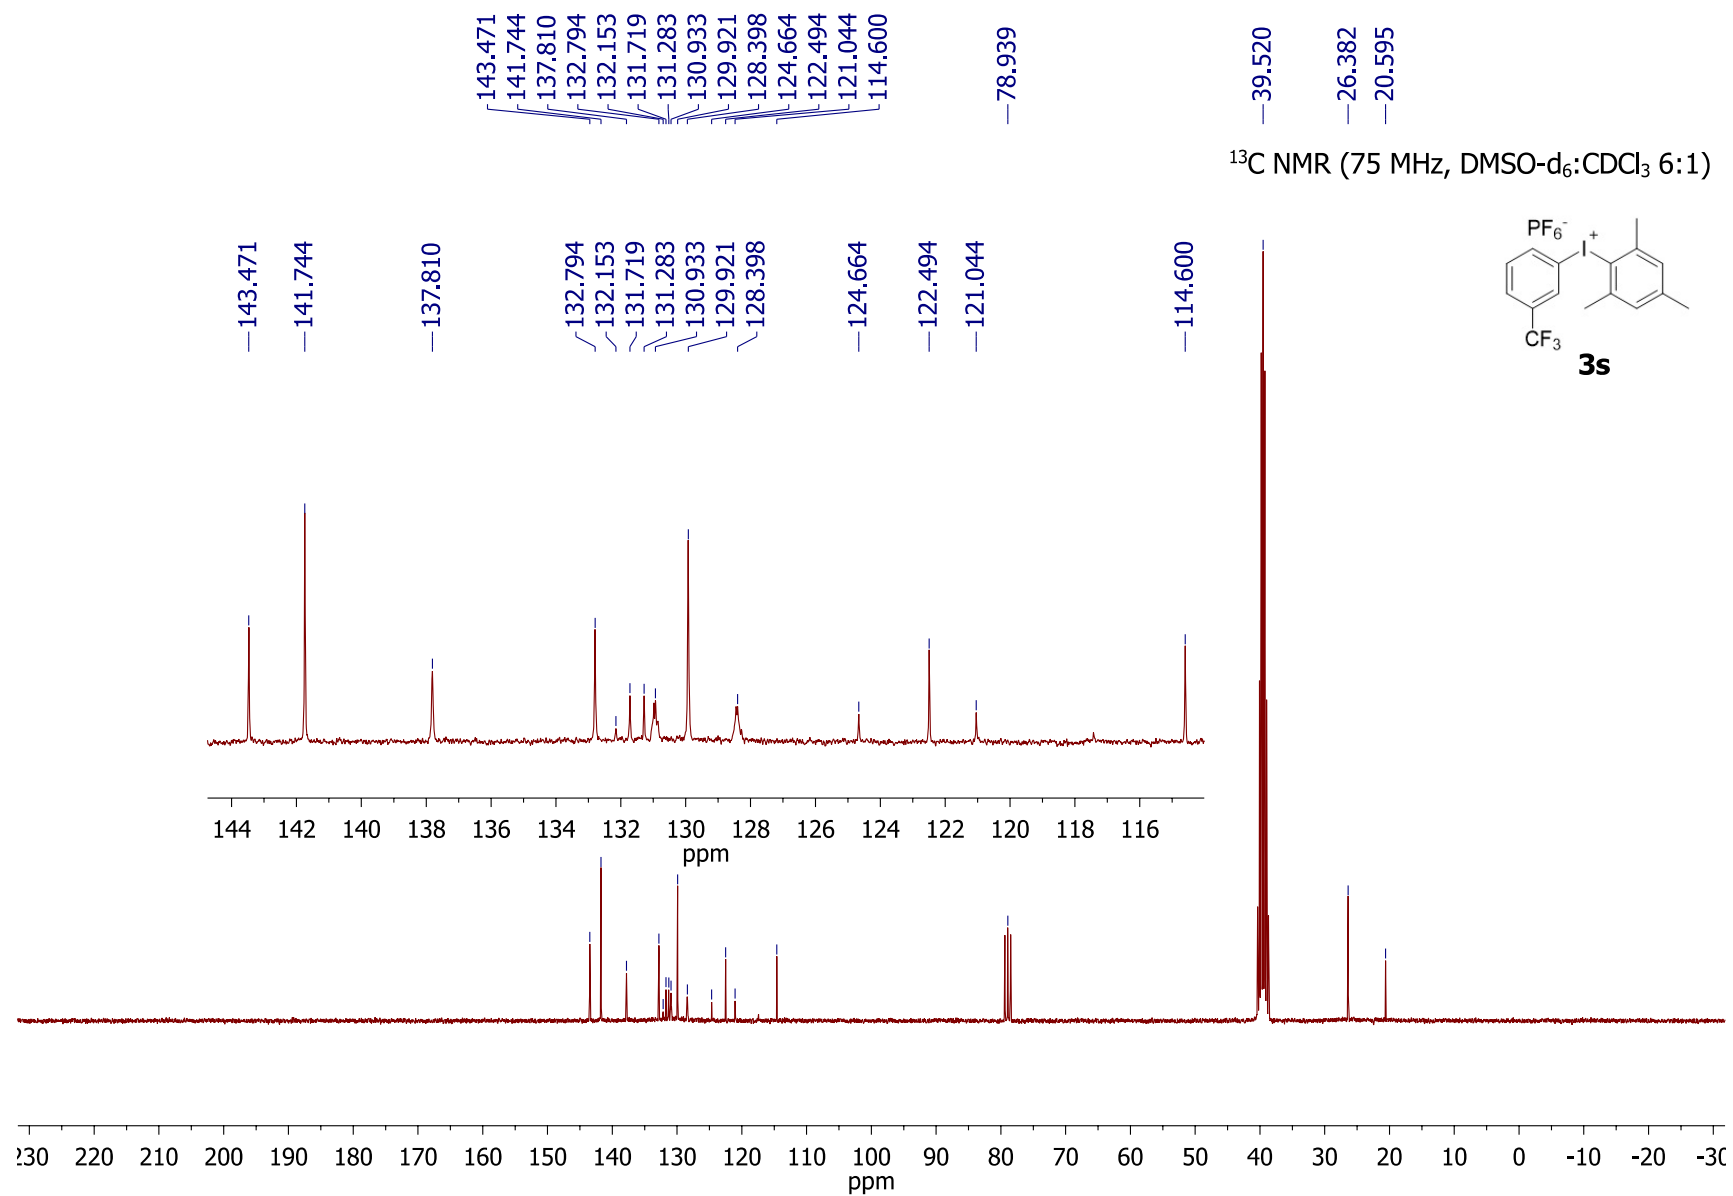

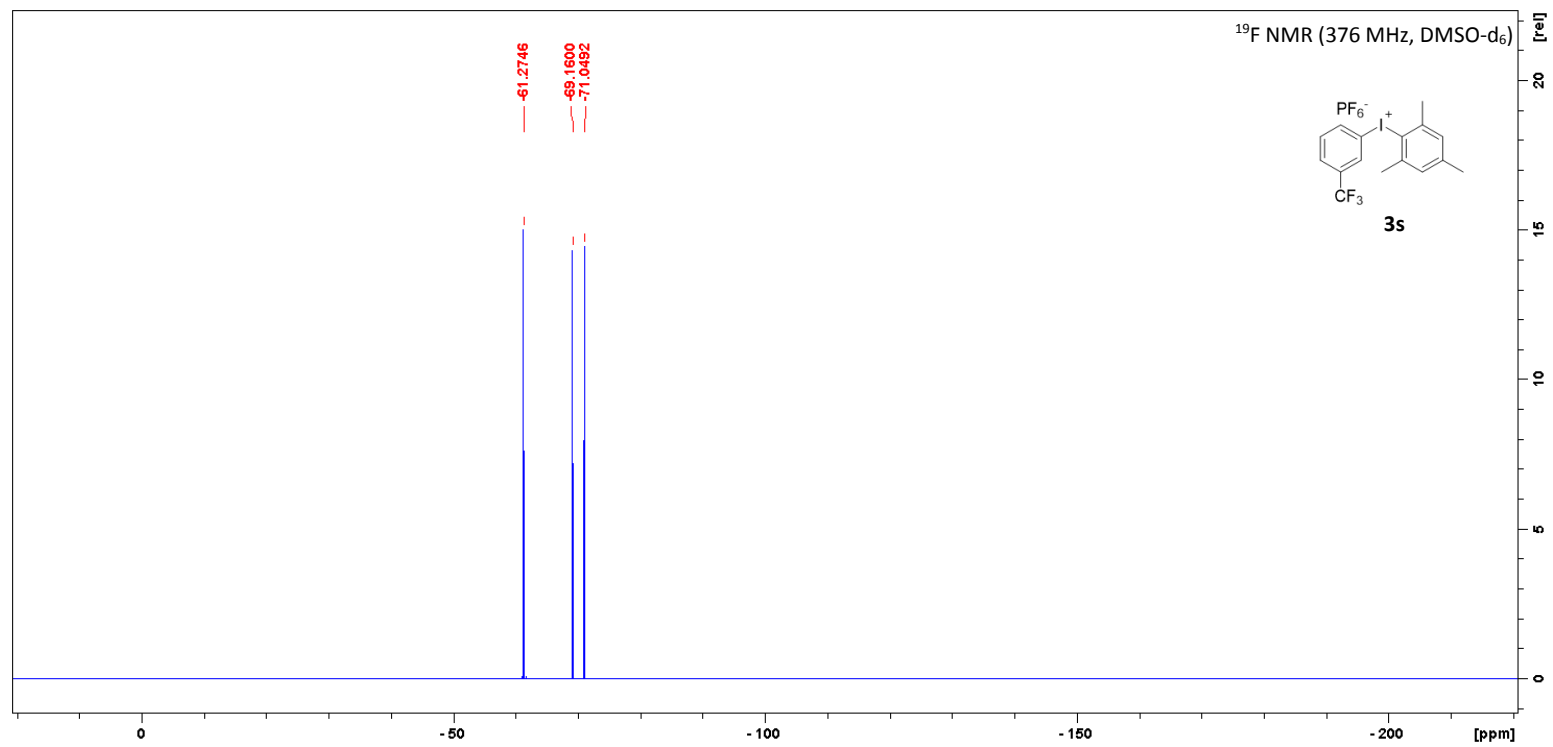

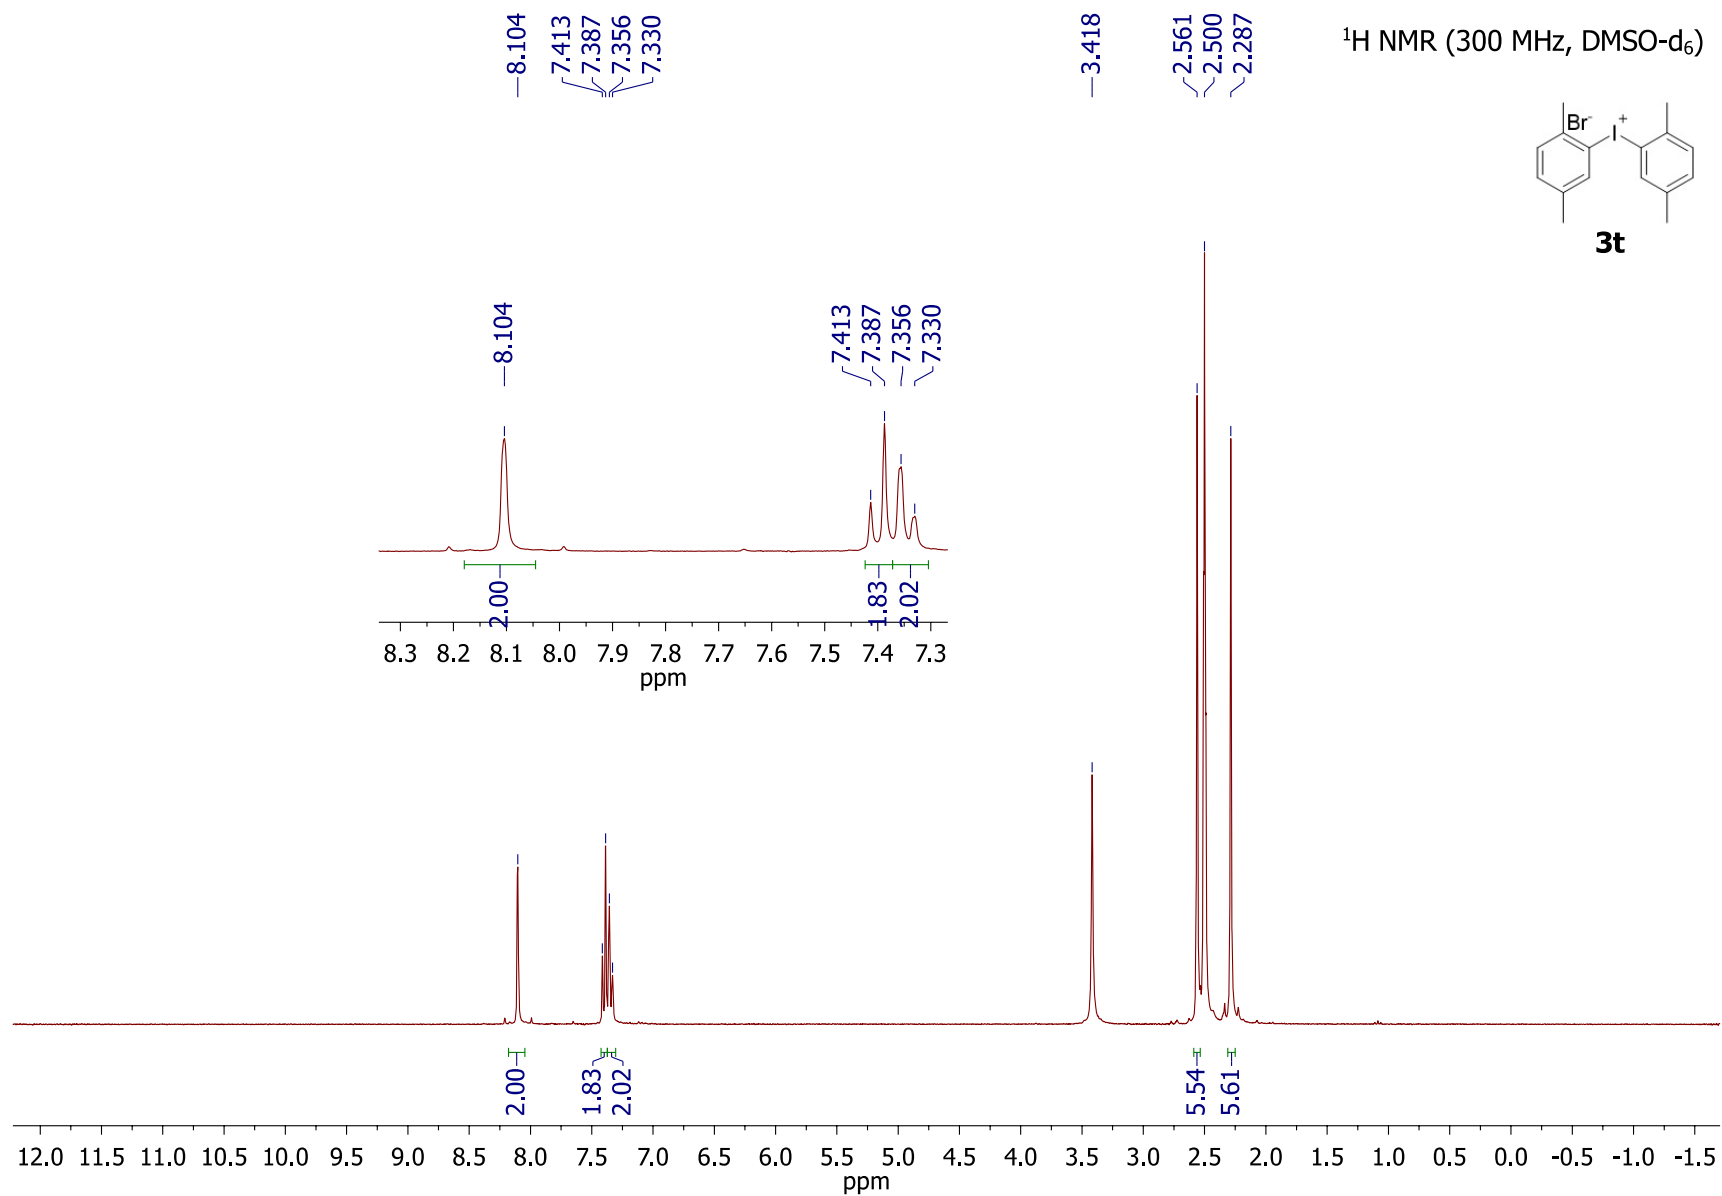

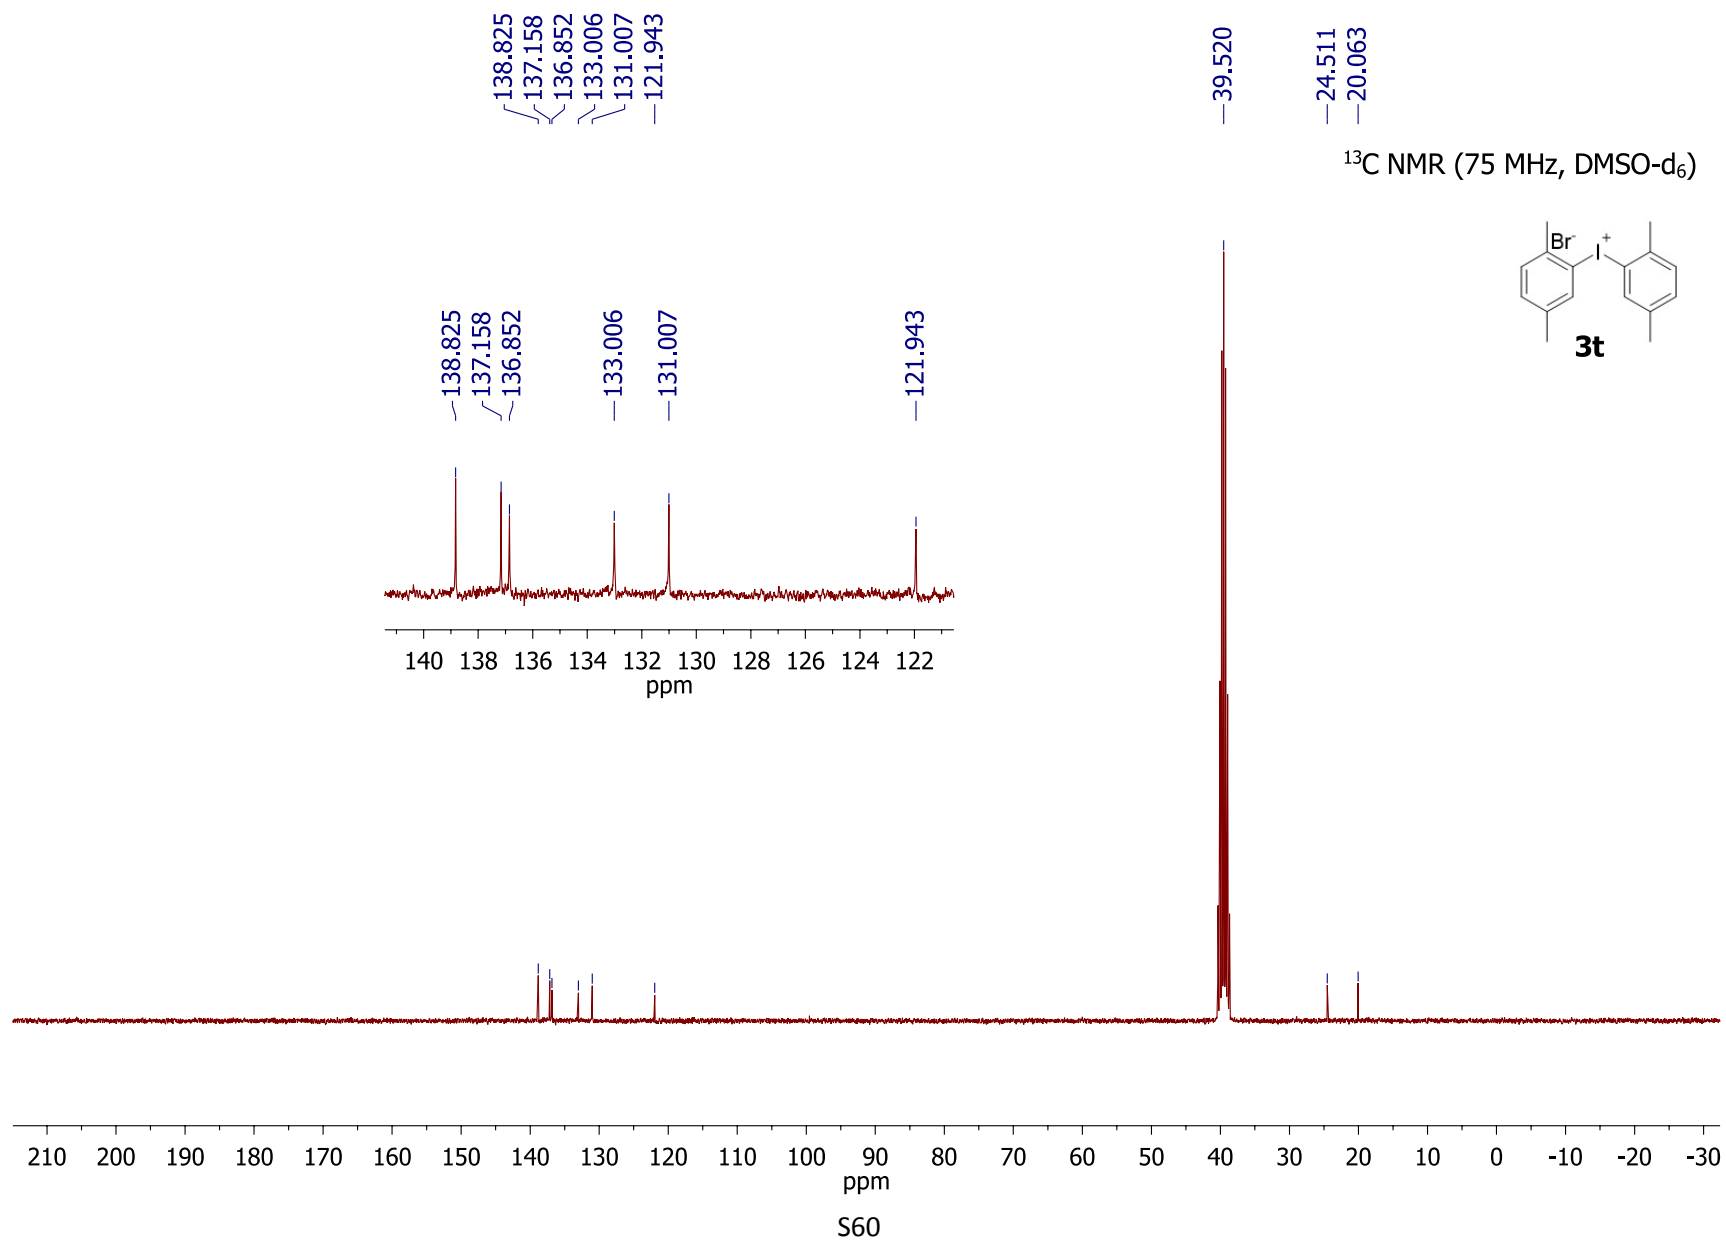

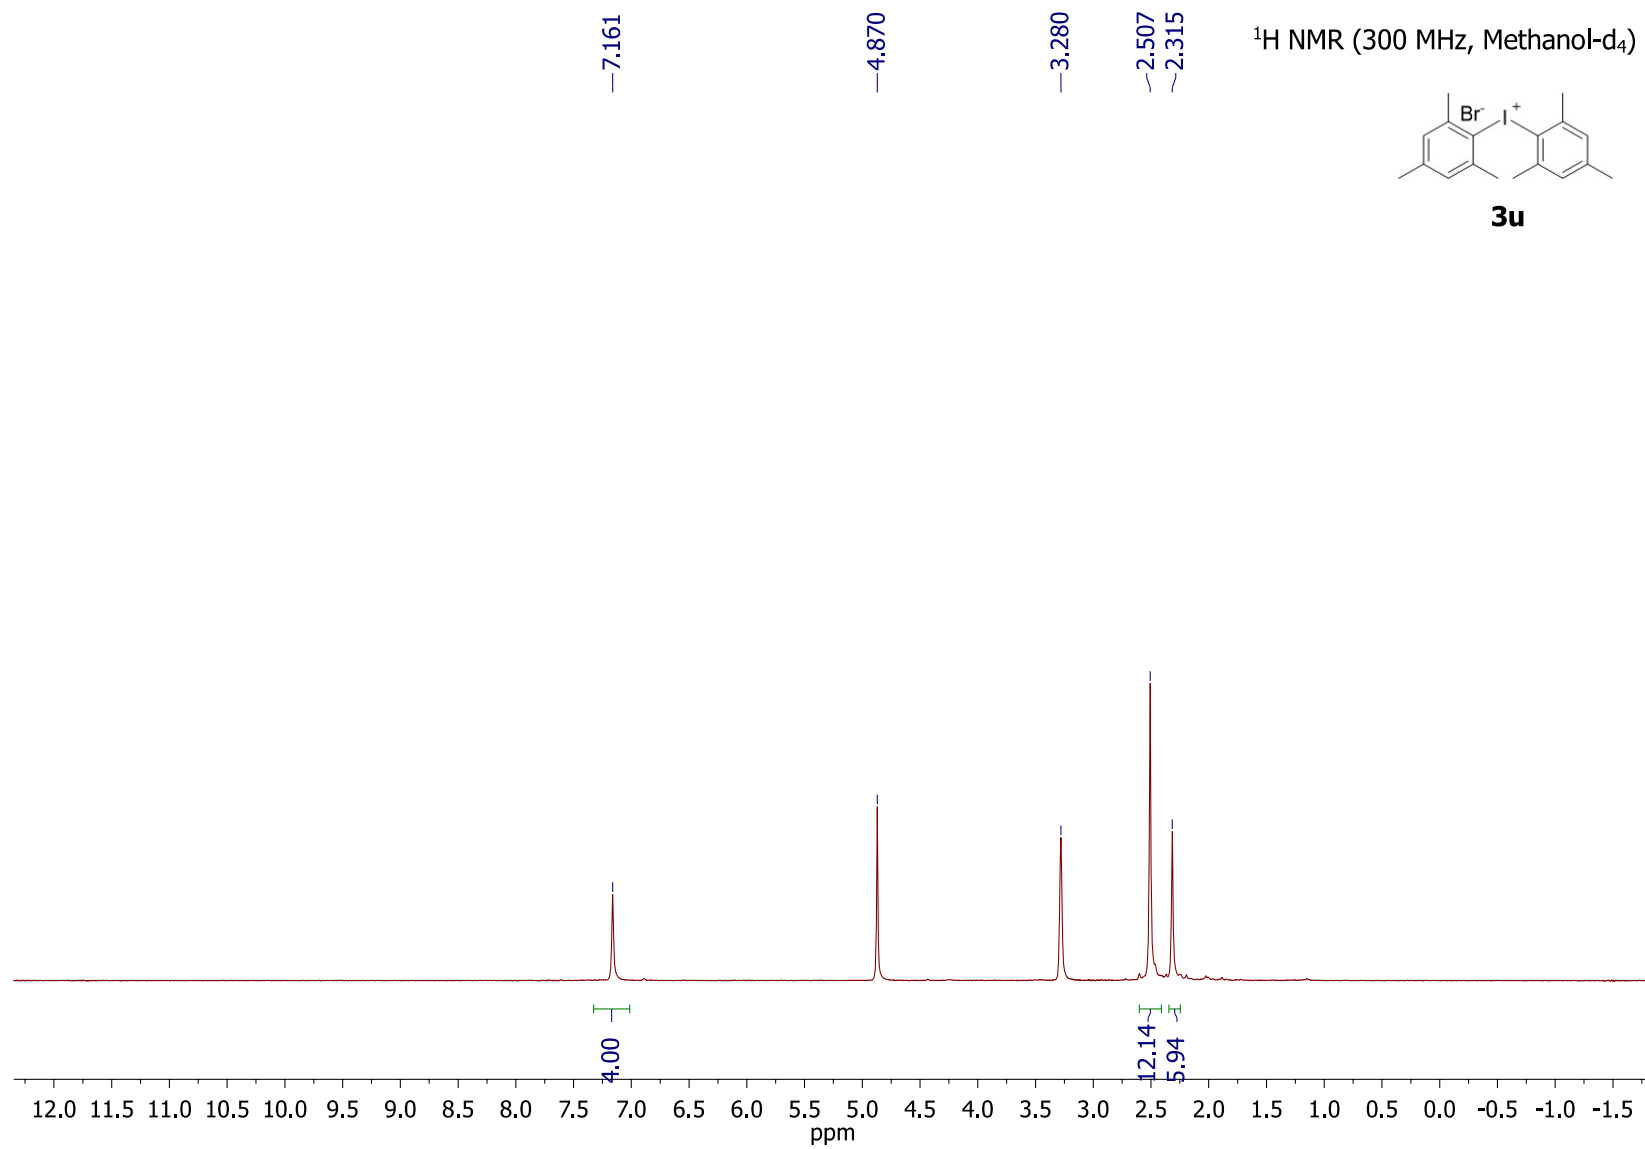

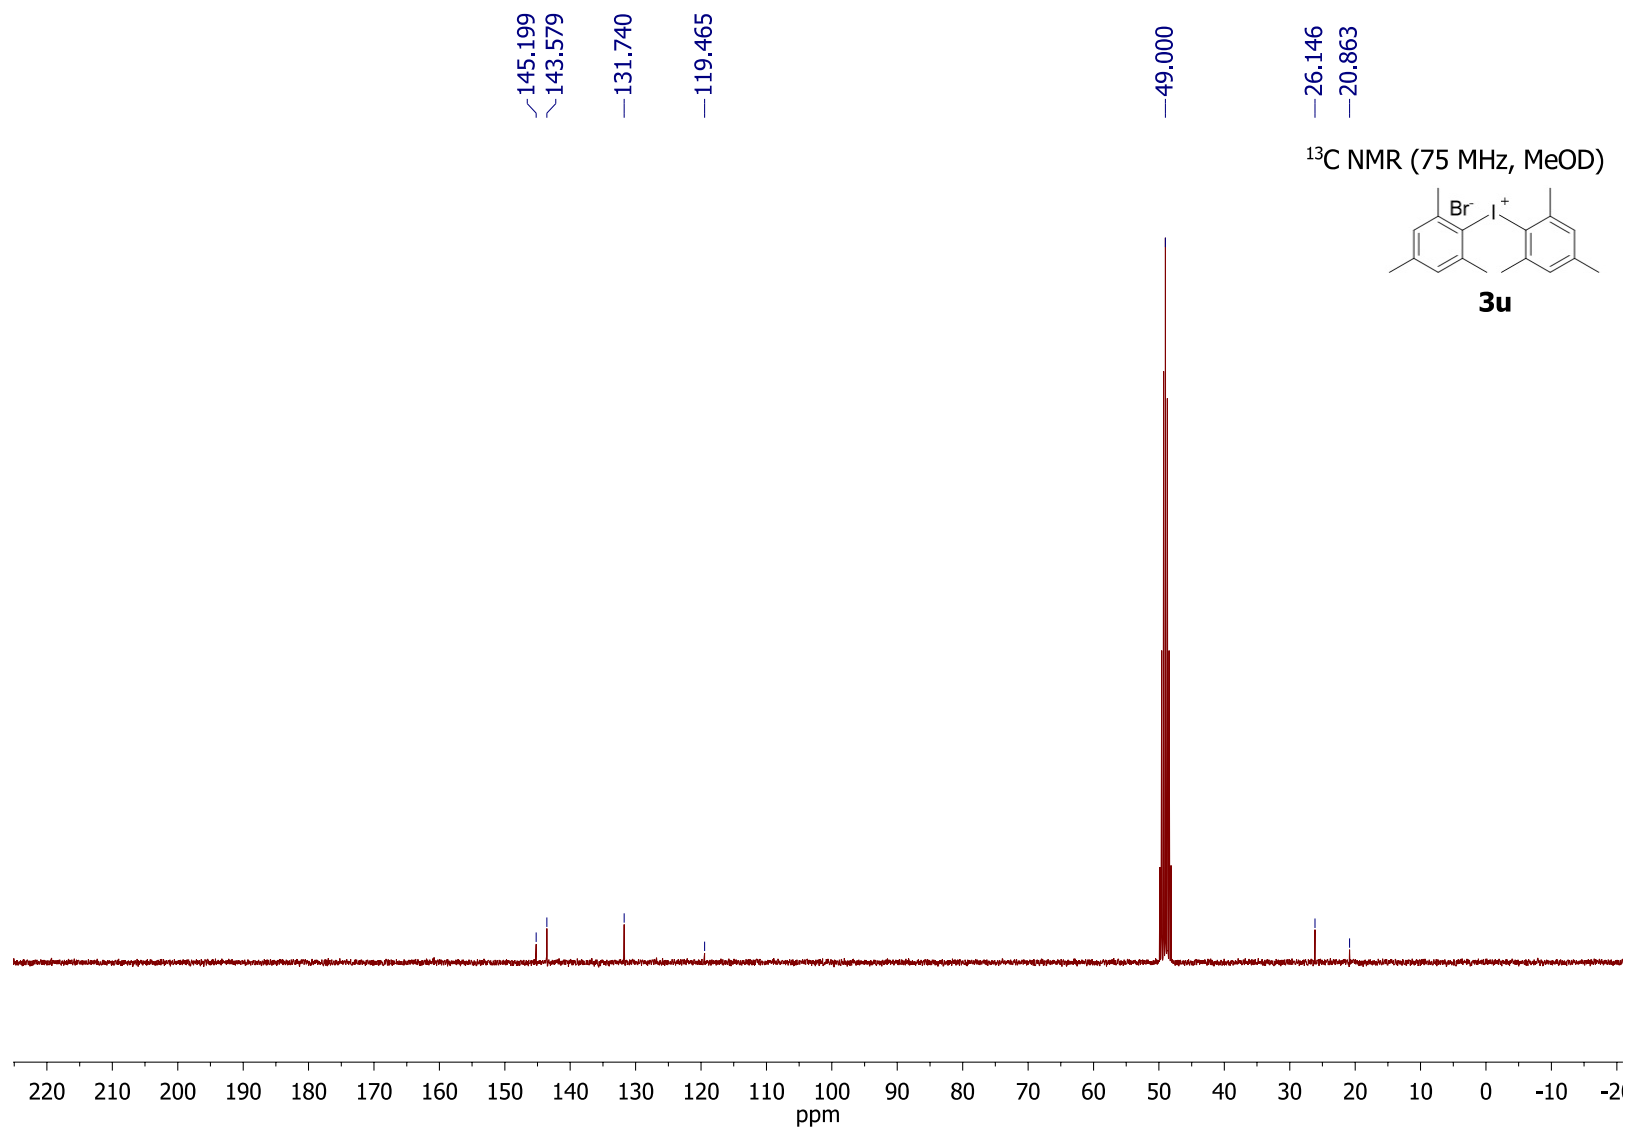

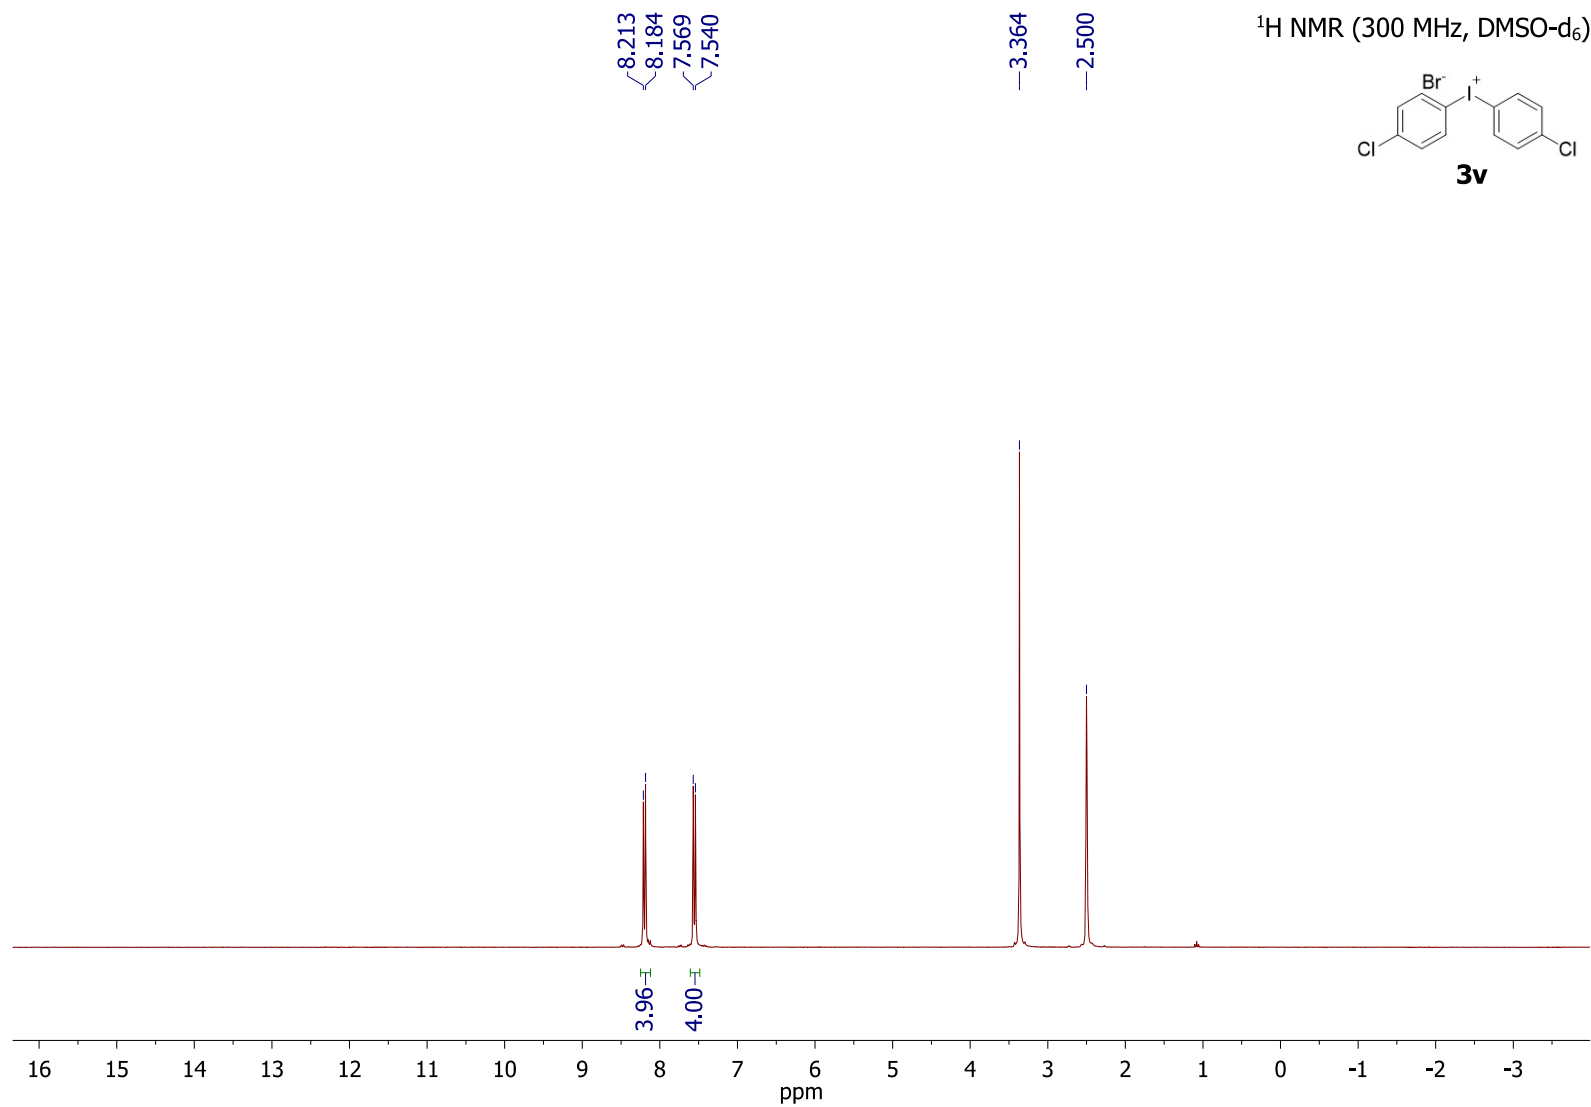

$^{13}\text{C}$  NMR (75 MHz, DMSO- $\text{d}_6$ )

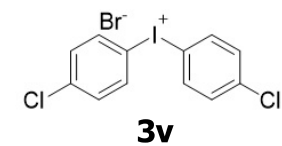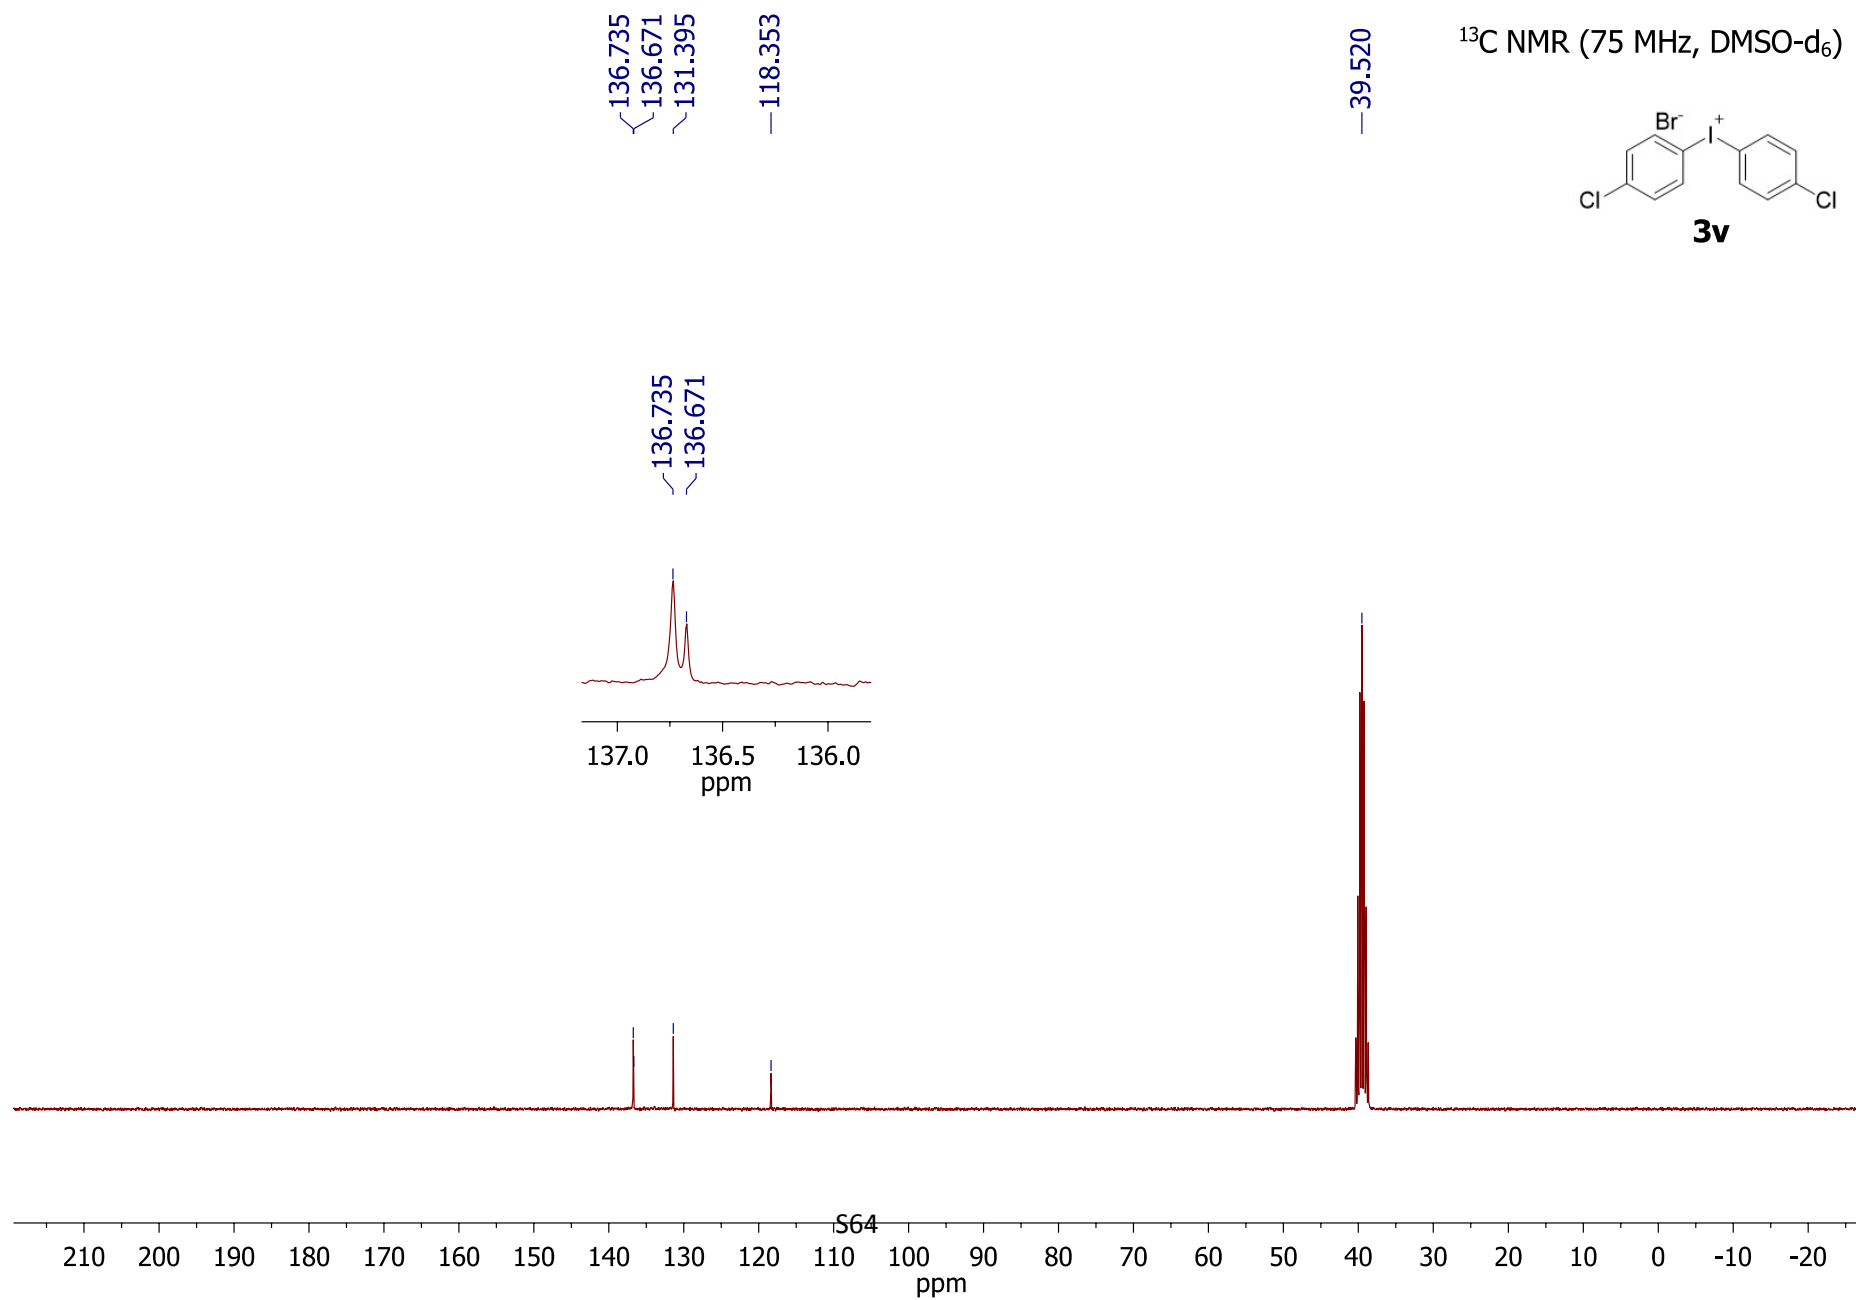

Supplement: Additional file 1 [file 1860-5397-14-70-S1.pdf]
